# Supplementary material for: Improving drug discovery using image-based multiparametric analysis of the epigenetic landscape
Source: eLife. 2019 Oct 22;8:e49683. doi: 10.7554/eLife.49683 (PMC6908434; doi:10.7554/eLife.49683)
Supplement: Source code 1. [file elife-49683-code1.script]

//////////////////////////////////////////////////////////////////////////////////////////////////////////////////////////////////////////////////////////////////////////
// "Standard Feature Output" version 0.17 March 2012																						
// Developed by Jarkko Ylanko at McMaster Biophotonics Facility 2009-2010
// Additional MBF procedures developed by Tony J Collins and Sean Cianflone at McMaster Biophotonics Facility 2008-2009		
// Report questions, bugs and concerns to info@macbiophotonics.ca
//////////////////////////////////////////////////////////////////////////////////////////////////////////////////////////////////////////////////////////////////////////

//////////////////////////////////////////////////////////////////////////////////////////////////////////////////////////////////////////////////////////////////////////
// 1. START
//////////////////////////////////////////////////////////////////////////////////////////////////////////////////////////////////////////////////////////////////////////
// 1.1 - USER INPUTS
input(IN_mode, "Segmentation adjustment", "MBF_FeatureExtraction mode selection", "s", "Select analysis mode. Optimize object detection in 'Segmentation adjustment', analyze image data in 'Feature extraction', or review classification results in 'Image gallery' (only available after image data analyzed in MBF_Classify). Possible values: Segmentation adjustment, Feature extraction, Image Display. Default: Segmentation adjustment.", 0.5)
input(IN_ImageONOFF, 0, "Show object reference images in Player Window", "y", "Show object borders from segmentation procedures in Player window during feature extraction. Default: off.", 4) // if one would like to see the object_detection procedure progress in the Player (note: this will display object borders as determined by nuclei_- and cytoplasm_detection prior to any object filtering coded below)
input(IN_fov, 0, "Select field of view for analysis", "i", "Field of view to analyze (1...total field count); if 0, all fields will be analyzed. Default: All Fields (0).", 5) // indicate field of interest
input(IN_Stencil, "All", "Select object masks for analysis", "s", "Object stencils to use for analysis below. Possible values: All, Nucleus and Cytoplasm, Nucleus, Cytoplasm, Cell. Default: All", 6)
input(IN_remove, "body", "Stencil for border object removal", "s", "For removal of cells not completely captured in image. Objects will be removed from further analysis if this stencil is touching the image border. Possible values: Body, Centers, Not used. Default: Body.", 6.1)
input(IN_Ch1, 0, "Reference channel for nuclei detection: Nuclei Detection", "i", "Indicate channel corresponding to object reference image according to slice order of multi-channel image file. When set to zero, the reference will be set to the channel presumed to contain far red signal in Opera Camera 3, if present, or else the first channel in the series. By convention, the reference channel will be reported as 'IM_1' (image) or 'Ch1' (channel) in the output data, and additional '#' channels as 'IM_#' or 'Ch#'. Default: 0.", 7) 
input(IN_RGBCh1, "Not used", "RGB reference channel: Nuclei Detection", "s", "Indicate RGB channel corresponding to object reference image. By convention, the reference channel will be reported as 'Image 1' or 'Channel 1' in the output below. Possible values: Red, Green, Blue, Not used. Default: Not used.",8) 
input(IN_cyto, 1, "Cytoplasm detection: Cytoplasm detection", "y", "Segmentation of cytoplasm. Detection parameter adjustments below. Default: on.", 9) // toggle for cyto detection
input(IN_CytoRef, 1, "Cytoplasm reference image: Cytoplasm detection", "i", "Indicate channel corresponding to cytoplasm reference image, relative to nuclear reference image specified by convention as 'IM_1' or 'Ch1' above. Value '#' selects the #th image in the multi-channel as cytoplasm reference. Default: 1, use nuclear reference image.", 9.1)
input(IN_Cont, 0, "Cell contrast filter: Cytoplasm detection", "i", "Use this to remove incorrectly segmented cells as defined by poor contrast. Higher values will lead to few cells while lower values will include more cells. Adjust by illustration. Default: 0 Keep al cells that are segmented", 9.2)
input(IN_multinuc, "0", "Multinuclei detection: Nuclei Detection 2", "y", "Perform second nucleus detection procedure within cell borders to identify cells with multiple nuclei. Segmentation performed on same reference image as above nucleus detection. Requires cytoplasm detection procedure to predefine whole cell borders. Detection parameters below are independent of parameters defined for initial nuclei detection procedure above, and vice versa. Adjust by illustration Nuclei2.", 9.3)
input(IN_spots, 0, "Small spot detection: Spot Detection", "y", "Segmentation of small (<30 pixel) and large (>30 pixel) foci of intensity. Default: off.",14) // toggle spot detection on/offinput(IN_ROIarea, 4, "Minimum area for ROI: ROI detection", "i", "Minimum area threshold for SCC detection. Default: 4.")
input(IN_ROI, 0, "ROI detection: Other Detection", "y", "Segmentation of large (>30 pixel) subcellular aggregates. Default: off.") // toggle spot detection on/off
input(IN_ROIarea, 4, "Minimum area for ROI: Other detection", "i", "Minimum area threshold for SCC detection. Default: 4.")
input(IN_ROIint, 1.5, "Minimum intensity for ROI: Other detection", "i", "Minimum intensity threshold adjustment factor for ROI detection, where threshold = (mean cell intensity in channel)*adjustment. Default: 1.")
input(IN_ROIround, 0, "Minimum roundness for ROI: Other Detection", "i", "Range 0..1. Adjustment for roundness threshold applied to segmenting ROI; values approaching 0 tolerate non-round (irregular) regions. Default: 0") // roundness threshold for ROI
input(IN_RefSEG, 0, "Include segmentation on reference image: Spot Detection", "y", "Attempt segmentation of sub-cellular structures using reference image. Default: off.",10) // toggle 1/2 for IM_1
input(IN_intensity, 0, "[INT] General intensity measurements: Features", "y", "Calculate intensity features on reference and signal channel(s). Default: off.", 15) // toggle intensity calculation suite on/off
input(IN_morph, 0, "[MOR] General morphology measurements: Features", "y", "Calculate area, perimeter, and compactness features on reference image. Default: off.",16) // toggle morphology calculation suite on/off
input(IN_Zone, 0, "Perinuclear zone segmentation: Other Detection", "y", "Define zone radiating out from nuclear border for intensity measurements. Only applies if intensity measurements are being calculated. Default: off.", 14.1) // define perinuclear space
input(IN_ZoneCount, 3, "Perinuclear zone width: Other Detection", "i", "Pixel width of perinuclear zone. Default: 3 pixels.",14.2) // tune size of perinuclear zone for intensity measurements
input(IN_Haralick, 0, "[TXT] Haralick texture features: Features", "y", "Haralick texture features.", 19) // toggle texture analysis on/off
input(IN_HarStepNum, 1, " ..Number of steps in Haralick calculation: Features", "i", "Number of steps to use in Haralick calculations. Default: 1.",20) // adjust number of Haralick steps
input(IN_TAS, 0, "[TXT] Threshold adjacency statistics: Features", "y", "Threshold adjacency statistics.", 21) // toggle texture analysis on/off
input(IN_TRangeMode, 1, " ..TAS range mode: Features", "i", "Threshold adjacency statistics calculation range mode. 1, nine range points; 2, four range points; 3, two range points. Default: 1", 22) // TAS calculation restriction
input(IN_TASmode, 1, " ..TAS output mode: Features", "i", "Threshold adjacency statistics calculation mode. 1, output all TAS steps; 2, every second step; 3, every third. Default: 1.", 23) // TAS feature output restriction
input(IN_RadMom, 0, "[TXT] Radial moments: Features", "y", "Calculates the kth radial moment (given by the integral of (r^k)*I(r) where I(r) is the intensity of the object based on object radius) of detected objects highlighting either the center or border as defined by the user.", 24) // toggle texture analysis on/off
input(IN_RefTXT, 0, "[TXT] Include texture analysis of reference image: Features", "y", "Measure texture features from reference image. Default: off.", 25) // toggle 2/2 for IM_1
input(IN_Pearsons, 0, "[CLC] Pearsons coefficient: Features", "y", "Calculates Pearson's coefficient, see Reference: Press, W.H., Flannery, B.P., Teukolsky, S.A. & Vetterling, W.T. (1988) Numerical Recipes in C. Cambridge University Press, Cambridge.", 26) // toggle colocalisation analysis on/off
input(IN_Manders, 0, "[CLC] Manders coefficient: Features", "y", "Calculates Manders colocalisation values. See Reference:Manders, EEM, Verbeek, FJ., and Aten, JA. (1993). Measurement of co-localisation of objects in dual-colour confocal images. Journal of Microscopy 169, 375-382.", 27) // toggle colocalisation analysis on/off
input(IN_ICQ, 0, "[CLC] ICQ coefficient: Features", "y", "Calculates ICQ colocalisation values. See Reference: Li, Qi, Lau, Anthony, Morris, Terence J., Guo, Lin, Fordyce, Christopher B., and Stanley, Elise F. (2004). A Syntaxin 1, G{alpha}o, and N-Type Calcium Channel Complex at a Presynaptic Nerve Terminal: Analysis by Quantitative Immunocolocalization. Journal of Neuroscience 24, 4070-4081.", 28) // toggle colocalisation analysis on/off
input(OP_data, 0, "Write data to file: Output", "y", "Write object-level data as .txt file.", 29) // specify whether or not to write data files, default = no, in order to avoid accidental redundancy in OP files
input(OP_stat, "Mean", "Statistic for well output: Output", "s", "Well-level feature output. Returns selected statistic for all features measured. Results will appear in Player window. If 'write data to file' is selected, results will also be written to file. Possible values: Mean, Median", 29.1)
input(OP_destination, "default", "Target directory: Output", "s", "Destination directory for data output. By default, a new directory named 'output' will be created in the same location as the image data selected for analysis.", 30) // default given by dir from MBF_getinfo3()
input(OP_treat, 0, "Save data by treatment: Output", "y", "Save object-level data in separate files according to treatment (defined below). Default: no separation, all data in single output file.", 31) // save data in multiple files according to multiple treatments
input(OP_treatID, "Wellindex", "Filename treatment: Output", "s", "Treatment name to be used in output data filenames, if applicable. Possible values: Treatment_Sum, Treatment01, Treatment02, Treatment03, Wellindex. Default: NA.", 32)
input(OP_imagecount, "5", "Number of object images to output (Mode 3): Output", "i", "Select the maximum number of object images per classification per field to be output. Used only if in Image Display mode. If set to 0, all object images will be generated. Default: 5.", 33)
input(OP_FieldResult, "Not used", "Output field image (Mode 3): Output", "s", "Optional: output classification results as stencils on field image. Used only in Image Display mode. Possible values: Not used, All fields, Informative fields. A Field is considered informative only if multiple classification events are present within its object population. Default: off.", 34)
input(OP_image2write, "Reference_image", "Signal image to output (Mode 3): Output", "s", "Select signal image to output in image gallery mode. Possible values: Reference_image, Signal_1, Signal_2, Signal_3, RGB", 35)
set(IN_cleanup=1) // toggle on/off (1/0) to remove clutter from Data Explorer window
set(IN_NAN=0) // toggle on/off (1/0) to remove NAN from output data
//////////////////////////////////////////////////////////////////////////////////////////////////////////////////////////////////////////////////////////////////////////
if(IN_mode=="Segmentation adjustment")
set(IN_adjust=1, IN_fx=0, IN_gallery=0)
end()
if(IN_mode=="Feature extraction")
set(IN_adjust=0, IN_fx=1, IN_gallery=0)
end()
if(IN_mode=="Image Display")
set(IN_adjust=0, IN_fx=0, IN_gallery=1)
end()
set(ModeSelect=IN_adjust+IN_fx+IN_gallery)
// 1.2 - OBLIGATE CODE
singlewell(compact=yes)
// 1.2.1 - EXPERIMENT INDEX (from MBF_GetInfo3 in MBF_ScriptBits.proc by Tony Collins)
set(platemap_tab="null")
if(length(wellIndex)==7)
	set(wellIndexLng="0"&wellIndex)
	else()
	set(wellIndexLng=wellIndex)
end()
// wellindex
set(row=substr(wellIndexLng, 1,3 )+0)
set(column=substr(wellIndexLng, 4,3 )+0)
eval(set(tmp=sourcedata.sublayout[0]))
if(errorcode>0)
	if(defined("sourcedata.field"))
		set(sourcedata.sublayout=sourcedata.field)
		else()
		foreach(1..sourcedata.rowcount, "rowcount")
		push(_sublayout, 1)
		end()
		//rowcount
		set(sourcedata.sublayout=_sublayout)
		delete(_sublayout, rowcount)
	end()
	// defined(sourcedata.field)
end()
// errorcode
if(defined("sourcedata.field"))
	TableFilter("Field==1", table=sourcedata)
	else()
	TableFilter("sublayout==1", table=sourcedata)
	set(Table.Field=Table.sublayout)
	delete(table.sublayout)
end()
// defined(sourcedata.field)
if(defined("sourcedata.Channel"))
	set(nCh=sourcedata.Channel.max)
	else()
	set(nCh=sourcedata.sourceimage.length)
end()
// defined(sourcedata.channel)
if(defined("sourcedata.field"))
	set(fov=sourcedata.Field.max)
	else()
	set(fov=sourcedata.sublayout.max)
end()
// defined(sourcedata.field)
set(nImages=sourcedata.@rowcount/fov)
if(__version__>=26 && length(wellIndex) == 9)
	set(WellIndex=substr(WellIndex, 1, 6))
End()
set (directoryStop=at(wellIndex, sourcedata.sourcefilename[0], -1))
set (dir=substr (sourcedata.sourcefilename[0], 0, directoryStop-1))
set(lastBackSlash=at("/",sourcedata.sourcefilename[0],-2))
set(exptFolder=substr(sourcedata.sourcefilename[0], 0, lastBackSlash))
set (firstSlash=at("/", sourcedata.sourcefilename[0], 1))
set (secondSlash=at("/", sourcedata.sourcefilename[0], 2))
if(defined("sourcedata.barcode"))
	set(barcode=sourcedata.Barcode[0])
	else()
	set(barcode="NoBarcode")
		foreach(1..sourcedata.rowcount, "rowcount")
		push(_barcode, barcode)
		end()
		//rowcount
		set(sourcedata.barcode=_barcode)
		delete(_barcode, rowcount)
end()
// defined(sourcedata.barcode)
set(skip=0)
eval(readfile(filename=dir&"\\platemap.txt"))	
if(warningcode!=2050)
	readtable(filename=dir&"\\platemap.txt", fileformat="ascii", columns="firstrow", separators="\t")
	tablefilter("wellindex=="&wellindex, table=table)
	if(table.@rowcount>0)
		foreach(0..table.@columncount-1, "c")
		output(table.[c][0], table.@columns[c])
	end()
		// c
	Insert_At(table, sourcedata.sourcefilename[0], "Path", 1)
	Insert_At(table, sourcedata.Barcode[0], "Barcode", 1)
	set(platemap_tab=table)	
else() // ie. if no "platemap.txt" is defined
	warning("Platemap is missing from image directory or "&wellindex&" is not accounted for!", confirm=no)
	set(skip=1)
	if(defined("table"))
		delete(table)
	end()
	create("table")
	insert_at(table, "temp", "temp")
	Insert_At(table, "Treatment03", "Treatment03", 1)
	Insert_At(table, "Treatment02", "Treatment02", 1)
	Insert_At(table, "Treatment01", "Treatment01", 1)
	Insert_At(table, "Treatment_Sum", "Treatment_Sum", 1)
	Insert_At(table, Column, "Column", 1)
	Insert_At(table, Row, "Row", 1)
	Insert_At(table, "Dye", "Dye", 1)
	Insert_At(table, "Cells", "Cells", 1)
	Insert_At(table, sourcedata.sourcefilename[0], "Path", 1)
	Insert_At(table, sourcedata.Barcode[0], "Barcode", 1)
	Insert_At(table, wellIndex, "WellIndex", 1)
	delete(table.temp, table.sourceimage, table.sourcefilename, table.frameindex, table.field)
	set(platemap_tab=table)	
end()
// table.@columncount>0
end()
//warningcode!2050
if(skip!=1)
delete(barcode,directoryStop,errorcode,errors,errors_xml,firstSlash,lastBackSlash,secondSlash,table,warningcode,wellIndexLng)
set(extensionpt=at(".", sourcedata.sourcefilename[0],-1))
set(exe=substr(sourcedata.sourcefilename[0],extensionpt+1))
if(exe!="flex")
	if(sourcedata.rowcount==1)
		if(IN_RGBCh1=="Not used")
			warning("Object reference channel for RGB image has not been assigned! Confirm channel assignment and try again.", confirm=yes)
			stop()
		else()
			if(IN_RGBCh1=="Blue")
				push(_RGB, "", "red", "green")
			end()
			// blue
			if(IN_RGBCh1=="Red")
				push(_RGB, "", "blue", "green")
			end()
			// red
			if(IN_RGBCh1=="Green")
				push(_RGB, "", "blue", "red")
			end()
			// green
		end()
		// not used
		set(image=sourcedata.sourceimage[0])
		RGBsplit(image)
		set(IM_1=_[&IN_RGBCh1])
		set(rc2=2)
		set(nCh=1)
		foreach(1..2, "rc")
			set(sigIM=_RGB[rc])
			set(IMtest=_[&sigIM])
			if(IMtest.max>0)
				set(_["IM_"&rc2]=_[&sigIM])
				set(rc2=rc2+1)
				set(nCh=nCh+1)
			end()
			// image.max>0
		end()
	// "rc"
		if(in_cleanup==1)
		delete(_RGB, rc, rc2,IMtest,sigIM)
		end()
	// cleanup
	end()
	// sourcedata.rowcount==1
end()
// image is RGB ie. non-flex
delete(exe, extensionpt)
//////////////////////////////////////////////////////////////////////////////////////////////////////////////////////////////////////////////////////////////////////////
// 1.3 - CREATE OUTPUT DIRECTORIES
if(!defined("dir"))
	set(dir="\\\mercury\operaimages\\"&OP_destination)
	else()
	set(date=__date__)
	set(datebreak1=at(".", date,1))
	set(datebreak2=at(".", date,2))
	set(dateyear=substr(date,datebreak2+1,4))
	set(datemonth=substr(date,datebreak1+1,datebreak2-datebreak1-1))
	set(dateday=substr(date,0,datebreak1))
	set(date=dateyear&"."&datemonth&"."&dateday)
	set(dir2=dir&"\\output\\"&date&"_output")
delete(datebreak1, datebreak2, dateyear, datemonth, dateday)
end()
// if defined dir
if(OP_data==1 AND IN_mode=="Feature extraction")
	MkDir(dir2)
end()
//if OP_data == 1
//////////////////////////////////////////////////////////////////////////////////////////////////////////////////////////////////////////////////////////////////////////
// 1.4a - IMAGE DISPLAY
if(IN_gallery==1)
eval(readfile(filename=dir&"\DirTemp.txt"))
//eval(readfile(filename=dirIM&"\ClassificationCoordinates.txt"))
if(warningcode!=2050)
readfile(filename=dir&"\DirTemp.txt")
set(content=substr(content,0,at("/",content,-1)))
set(dirIM=content&"/ImageGallery_"&date)
readtable(filename=dirIM&"\CoordinatesTemp.txt")
set(filter=WellIndex*1)
tablefilter("wellindex==filter", table=table)
set(CoordinateTable=table)
delete(table)
else()
getfiles()
set(dirIM=substr(files[0],0,at("/",files[0],-1)))
write(dirIM&"/", dir&"\DirTemp.txt", "ascii")
set(dirIM=dirIM&"/ImageGallery_"&date)
MkDir(dirIM)
foreach(0..files.length-1, "fl")
set(_["filename"&fl+1]=Files[fl])
set(IN_filename=Files[fl])
set(filetypebreak=at(".", IN_filename,-1))
set(filetype=substr(IN_filename,filetypebreak,4))
set(fileshortname=substr(IN_filename,0,filetypebreak))
if(filetype!=".dat")
	readtable(filename=IN_filename)
stop()
	//writetable(table, dirIM&"\CoordinatesTemp.txt")
	else()
	eval(readfile(filename=fileshorstname&".txt"))
		if(errorcode==0)
		readtable(filename=fileshortname&".txt")
		end()
		// 0
	ReadTable(filename=IN_filename, separators="\t")
	push(_columnheaders, "wellindex", "barcode", "dir", "platemap", "fov", "Xcoord", "Ycoord", "classification")
	foreach(1..table.rowcount-1, "t")
	//foreach(2..table.rowcount-1, "t")
		set(coord=table.A[t])
		foreach(0.._columnheaders.length-1, "s")
			set(header=_columnheaders[s])
			set(space=(8-s)*-1)
			set(headerspace=at(" ",coord,space))
				if(s==7)
					push(_["index_"&s],substr(coord, headerspace))
					//set(headervalue=1*substr(coord, headerspace))
					else()
					set(spacediff=at(" ", coord, space+1)-headerspace)
					push(_["index_"&s],substr(coord, headerspace, spacediff))
					//set(headervalue=1*substr(coord, headerspace, spacediff))
				end()
				// s==7
		end()
		// s
	end()
	// foreach t
	create("table")
	foreach(0.._columnheaders.length-1,"s")
		Insert_At(table, _["index_"&s],_columnheaders[s],table.length)
		delete(_["index_"&s])
	end()
	// s
	delete(_columnheaders)
	eval(readfile(filename=dirIM&"\CoordinatesTemp.txt"))
	if(errorcode==2050)
		writetable(table,dirIM&"\CoordinatesTemp.txt")
		else()
		write(table,dirIM&"\CoordinatesTemp.txt","ascii", append=yes)
		end()
		// 2050
end()
// if filetype!=.DAT
set(_["table"&(fl+1)]=table)
if(fl>0)
	appendtable(tableX, _["table"&(fl+1)])
	set(tableX=table)
	else()
	set(tableX=table)
end()
//n>1
set(filter=WellIndex*1)
tablefilter("wellindex==filter", table=tableX)
set(CoordinateTable=table)
delete(table)
end()
// "fl"
end()
// error2050
end()
// IN_gallery

//////////////////////////////////////////////////////////////////////////////////////////////////////////////////////////////////////////////////////////////////////////
// 1.4 - INPUT FIELD OF VIEW
if(!defined("fov"))
	set(fov=1)
end()
// if !defined fov
if(IN_fov>fov)
	set(IN_fov=fov)
end()
// IN_fov>fov
if(IN_fov>0) // analyze one field
	set(StartField = IN_fov)
	set(EndField = IN_fov)
	else()
	set(StartField=1)
	set(EndField=fov)
end()
	// if IN_fov==0
//////////////////////////////////////////////////////////////////////////////////////////////////////////////////////////////////////////////////////////////////////////
// 1.5 - DETERMINE NUCLEAR REFERENCE ASSIGNMENTS
if(IN_RGBCh1=="Not used")
push(ChannelSeries1, "", "0", "1", "2", "3")
push(ChannelSeries2, "", "0", "-1", "1", "2")
push(ChannelSeries3, "", "0", "-2", "-1", "1")
push(ChannelSeries4, "", "0", "-3", "-2", "-1")
if(IN_Ch1==0)
	if(nCh>1)
		foreach(1..nCh, "j") // "j" used for same nCh loop below
			set(cam=substr(SourceData.name[j-1], 8,1 )+0)
			set(cam3=no)
			if(cam==3)
				set(nuc_ch=(j-1)) // if reference channel=ch_1, then (j-1)=0; if 2, then (j-1)=1, etc.
				set(ChannelSeries=_["ChannelSeries"&j])
				delete("ChannelSeries1", "ChannelSeries2", "ChannelSeries3", "ChannelSeries4")
				set(cam3=yes)
			end()
			// if cam==3
			if(cam3==no)
				set(IN_Ch1=1)
			end()
			//cam3=no
			delete(cam3)
		end()
		//foreach 1..nCh
	end()
	//if nCh>1
	else()
	set(ChannelSeries=_["ChannelSeries"&IN_Ch1])
	set(nuc_ch=IN_Ch1-1)
end()
// if IN_Ch1==1
end()
// if IN_RGBCh1=="Not used"
//////////////////////////////////////////////////////////////////////////////////////////////////////////////////////////////////////////////////////////////////////////
// 1.6 MISCELLANEOUS INPUTS
if(IN_ImageONOFF==1)
	set(_imageview="yes")
	else()
	set(_imageview="no")
end()
// if imageonoff =1
push(_signal, "", "Ch1", "Ch2", "Ch3", "Ch4") // by convention, Ch1 = IM_1, ie nuclear reference
if(IN_cyto==0)
set(IN_Stencil="Nucleus")
end()
//if(IN_cyto==0)
if(IN_Stencil=="All")
push(_stencil, "", "Nucleus", "Cytoplasm", "Cell")
end()
// IN_Stencil
	if(IN_Stencil=="Nucleus and Cytoplasm")
	push(_stencil, "", "Nucleus", "Cytoplasm")
	end()
	// IN_Stencil
		if(IN_Stencil=="Nucleus")
		push(_stencil, "", "Nucleus")
		end()
		// IN_Stencil
			if(IN_Stencil=="Cytoplasm")
			push(_stencil, "", "Cytoplasm")
			end()
				// IN_Stencil
				if(IN_Stencil=="Cell")
				push(_stencil, "", "Cell")
				end()
				// IN_Stencil
set(fieldcount=0)
if(IN_multinuc==1)
set(IN_morph=1)
end()
// IN_multinuc==1

//////////////////////////////////////////////////////////////////////////////////////////////////////////////////////////////////////////////////////////////////////////
// 2. ANALYSIS
//////////////////////////////////////////////////////////////////////////////////////////////////////////////////////////////////////////////////////////////////////////
// 2.1 - SIGNAL CHANNEL ASSIGNMENTS
foreach(StartField..EndField, "i")
if(IN_RGBCh1=="Not Used")
	if(IN_Ch1==0)
		if(nCh>1)
			foreach(1..nCh, "j") // "j" used for same nCh loop below
			set(_["IM_"&j]=SourceData.SourceImage[(i-1)*nCh+nuc_ch+ChannelSeries[j]]) // specify as signal of interest in channel "j"
			end()
			// for each nCh
		else()
			set(IM_1=SourceData.SourceImage[i-1])
		end()
		// if nCh>1
		else()
		foreach(1..nCh, "j")
			set(_["IM_"&j]=SourceData.SourceImage[(i-1)*nCh+nuc_ch+ChannelSeries[j]]) // specify as signal of interest in channel "j"
		end()
		// j
	end()
	// if IN_Ch1==0
end()
// if IN_RGBCh1=="Not used"
//////////////////////////////////////////////////////////////////////////////////////////////////////////////////////////////////////////////////////////////////////////
// 2.2 - IMAGE QUALITY CHECKPOINT - OPTIONAL
if(IN_gallery==1)
	set(IN_adjust=1)
end()
// IN_gallery
if(IN_adjust==1)
nuclei_detection_select(IM_1, yes)
CalcIntensity(Image=IM_1, CalcStdDev=yes,objects=Nuclei)// Code by Santosh 11/13/2013
Set(Nuclei=Objects)
if(IN_cyto==0)
	cytoplasm_detection_a(IM_1, no)
	else()
	if(IN_CytoRef!=1 AND IN_CytoRef<(nCh+1))
	set(CytoRef=_["IM_"&IN_CytoRef])
	else()
	set(CytoRef=IM_1)
	end()
	// IN_CytoRef==1
	cytoplasm_detection_a(CytoRef, yes)
	delete(CytoRef)
end()
//IN_cyto
CalcIntensity(Cytoplasm, IM_1, objects=Wholecells, CalcStdDev=yes)	// Code by Santosh 11/13/2013
SetAttr("int_cont", nuclei.intensity/Objects.Cytoplasm_intensity, objects=objects)
SetAttr("dev_cont", nuclei.intensity_stddev/Objects.Cytoplasm_intensity_stddev, objects=objects)
Set(Wholecells=Objects)
objectfilter(area>0, objects=wholecells) 
// MULTINUCLEUS DETECTION // adapted from multinucleation script courtesy Hind Azegrouz @ CNIC, Spain
set(wholecells=objects)
if(IN_multinuc==1)
	set(Nuclei1=Nuclei)
	calcerosion(-1, border, NumberOfSteps=3, objects=WholeCells, RestrictiveStencil=WholeCells.body)
	set(limit=objects.border_eroded.mask.image)
	Inverse(image=limit)
	set(limit=image-254)
	set(IM_nuc2=IM_1*limit)
	Nuclei_Detection_Select_2(IM_nuc2, yes)
	CalcStat("max", AttrName="belongtocell", Image=WholeCells.index, objects=Nuclei) // determine to which cell each nucleus belongs
	calcattr("belongtocell", "belongtocell-1") // correction for 0..n vs 1..n indexing (required?)
	CalcMassCentre()
	set(Nuclei2=objects) 
	calcstat("sum", Image=Nuclei2.MassCentre.mask.image, objects=WholeCells, AttrName="multinucleicount")
	set(WholeCells=objects)
	set(Nuclei=Nuclei1)
	delete(Nuclei1, limit, image)
end()
//IN_multinuc
set(objects=wholecells)
If(objects.count>0)
ObjectFilter((int_cont>IN_cont) OR (dev_cont>In_cont))
	if(IN_Cont!=0)
	ImageView(Objects.border, "Cells after contrast filter", image=IM_1)
	end()
End()

if(objects.count>0)
CalcMassCentre(objects=objects)
SetAttr("aaFieldofView", filledvec(objects.@count, i))
SetAttr("aaYcoord", objects.MassCentre.y.target)
SetAttr("aaXcoord", objects.MassCentre.x.target)
set(fieldcount=fieldcount+1)
calcattr(centers_area, nuclei.area[objectindex], objects=objects)
calcattr(centers_contrast, nuclei.contrast[objectindex], objects=objects)
calcattr(centers_intensity, nuclei.intensity[objectindex], objects=objects)
set(_["obj_"&i]=objects)
if(defined("all_cells"))
	addobjects(objects, DeleteGeometry=yes, objects=all_cells)
	set(all_cells=objects)
	else()
	set(all_cells=objects)
end()
//if defined all_count
	set(IM_blue=(255*IM_1/IM_1.max))
		if(nCh>1)
		set(IM_green=(255*IM_2/IM_2.max))
			if(nCh>2)
			set(IM_red=(255*IM_3/IM_3.max))
			RgbJoin(red=IM_red, blue=IM_blue, green=IM_green)
			set(_["RGB_"&i]=image)
			delete("IM_red")
			else()
			RgbJoin(blue=IM_blue, green=IM_green)
			set(_["RGB_"&i]=image)
			end()
			// (nCh>2)
			delete("IM_green")
		else()
		RgbJoin(blue=IM_1)
		set(_["RGB_"&i]=image)
		end()
		// (nCh>1)
	delete("IM_blue")
end()
//object.count>0
//////////////////////////////////////////////////////////////////////////////////////////////////////////////////////////////////////////////////////////////////////////
// 2.2b - IMAGE DISPLAY CONT.
if(objects.count>0)
if(IN_gallery==1)
set(dir3=dir2&"\\ImageGallery")

if(OP_image2write=="Reference_image")
set(IM_Category=IM_1)
end()
	if(OP_image2write=="Signal_1")
	set(IM_Category=IM_2)
	end()
		if(OP_image2write=="Signal_2")
		set(IM_Category=IM_3)
		end()
			if(OP_image2write=="Signal_3")
			set(IM_Category=IM_4)
			end()
				if(OP_image2write=="RGB")
				set(IM_Category=_["RGB_"&i])
				//set(text="white")
				end()

tablefilter("fov*1==i", table=CoordinateTable)
if(table.@rowcount!=0)
set(table.Xcoord=table.Xcoord*1)
set(table.Ycoord=table.Ycoord*1)
set(CoordinateTableX=table)
set(Categories=CoordinateTableX.classification*1)
set(CategoriesCount=Categories.max)
set(IN_FieldGallery=1) // bug patch 16 May 2012 - JY
	if(categories.max>3)	
	warning("Classification results not drawn on whole field image -- too many categories present for optimal viewing (maximum 3 categories supported by Field Gallery Output module).")
	set(IN_FieldGallery=0)
	end()
	// categories.max>3
set(objects=_["obj_"&i])
foreach(0..objects.count-1, "oc")
tablefilter(Xcoord==objects.aaXcoord[oc] AND Ycoord==objects.aaYcoord[oc], table=CoordinateTableX)
if(table.@rowcount!=1)
	if(table.@rowcount>1)
		warning("Error in classified data set: multiple objects at same X and Y coordinate. Inspect input data set.", confirm=yes)
		stop()
	end()
	// multiple objects at a given X and Y
	if(table.@rowcount==0)
		push(_vecClass, 0)
//		warning("Error in classified data set: at least one object is missing an X and Y coordinate. Confirm segmentation parameters and try again.", confirm=yes)
//		stop()
	end()
	// no objects with the same X and Y
else()
push(_vecClass, table.classification[0])
end()
// catch for multiple or no objects at input X and Y
end()
// oc
calcattr(Category, _vecClass[objectindex], objects=_["obj_"&i])
delete(_vecClass)
calcerosion(-1, cytoplasm_border, objects=objects)
set(objects_all=objects)
// FIELD OUTPUT
if(OP_FieldResult!="Not used")
set(OP_Field=0)
if(OP_FieldResult=="Informative fields" AND categories.max>categories.min)
set(OP_Field=1)
else()
if(OP_FieldResult=="All fields")
set(OP_Field=1)
end()
// all fields
end()
// informative fields
if(IN_FieldGallery!=1)
set(OP_Field=0)
end()
//if(IN_FieldGallery!=0) ie if too many categories present for drawing results on field image

if(OP_Field==1)
MkDir(dirIM&"\FieldCollection\\"&OP_image2write)
	//set(IM_category=IM_2*255/(IM_2.mean)+3*(IM_2.stddev))
	//set(IM_category=IM_2*255/IM_2.mean)
	//set(IM_category=_["RGB_"&i])	
	//set(IM_category=IM_2)
//split(5000,image=IM_2)

Mask(4095, image=IM_Category)
set(IM_correct1=mask*IM_Category)
set(IM_correct2=mask*4095)
set(IM_temp=IM_Category-IM_correct1)
set(IM_new=IM_temp+IM_correct2)
rangemap(old_end=4095, new_end=255, fillrange=no, image=IM_new)
set(IM_category=image)
delete(IM_temp, IM_correct1, IM_correct2, IM_new)
	//gamma(image=image)
	//set(IM_category=image)
	push(_colour, "", "rgb(255,255,0)", "rgb(255,0,0)", "rgb(238,130,238)")
	foreach(1..Categories.max, "c")
		if(c<4)
		set(colour=_colour[c])
		objectfilter(Category==c, objects=objects_all)
		if(objects.count>0)
			set(_["objects_category_"&c]=objects)
			//carrypixels(objects.Cytoplasm_border_eroded,200, image=IM_category)	
			//carrypixels(objects.Cytoplasm_border_eroded, colour, image=image)
			carrypixels(objects.Cytoplasm_border, IM_category.max, image=IM_category)	
			carrypixels(objects.Cytoplasm_border, colour, image=image)
		set(IM_category=image)
		end()
		// objects.count>0
		end()
		// c<4
	end()
	// c 
	//ImageView(IM_category, "Signal image showing classification results for Field "&i, image=IM_category)
	ImageView(IM_category, OP_image2write&" image showing classification results for Field "&i, image=IM_category)
//set(IM_temporary=IM_category)
	eval(readfile(dirIM&"\FieldCollection\\"&OP_image2write&"\\"&wellindex&"_F"&i))
	if(warningcode==2050)
		if(OP_data==1)
			writeimage(dirIM&"\FieldCollection\\"&OP_image2write&"\\"&wellindex&"_F"&i&".jpg", image=IM_category, imageformat="jpg")
		end()
		// OP_data
	end()
	// warning code
	delete(_colour, colour)
	end()
// OP_field==1
end()
// OP_field result != not used
// OBJECT-LEVEL IMAGE OUTPUT
set(imagecount=OP_imagecount)
//set(IM_category=IM_2*255/IM_2.max)
//split(5000,image=IM_2)
if(OP_image2write!="RGB")
split(5000,image=IM_Category)
delete(bright_image)
gamma(image=image)
set(IM_category=image)
end()

// if singlechannel image OP
foreach(1..Categories.max, "c")
	//if(c<4)
	objectfilter(Category==c, objects=objects_all)
	if(objects.count>0)
	set(_["objects_category_"&c]=objects)
	set(objectstmp=_["objects_category_"&c])
	if(OP_data==1)
		set(dir4=dirIM&"\\class_"&c&"\\"&OP_image2write)
		MkDir(dir4)
	end()
	// OP_data==1
	if(objectstmp.count>imagecount)
		set(ObjectStart=floor((objectstmp.count-1)/2)-floor(imagecount/2))
		set(ObjectEnd=floor((objectstmp.count-1)/2)+floor(imagecount/2))
		else()
		set(ObjectStart=0)
		set(ObjectEnd=objectstmp.count-1)
	end()
	// ObjectLoop definition
		foreach(ObjectStart..ObjectEnd, "d")
			set(X=objectstmp.aaXcoord[d])
			set(Y=objectstmp.aaYcoord[d])
			objectfilter(aaXcoord==X AND aaYcoord==Y, objects=objectstmp)
				if(OP_image2write=="RGB")
				Mask2Stencil(objects.Cytoplasm_border.mask, "One large object")
				Palette_Gradual(middlecolor="white", startcolor="white", endcolor="white")	
				ApplyPalette()
				CarryPixels(stencil, image, image=IM_Category)
				else()
				carrypixels(objects.Cytoplasm_border, IM_category.max, image=IM_category)
				carrypixels(objects.Cytoplasm_border, "white", image=image)
				end()
				// if RGB
				//carrypixels(objects.Cytoplasm_border, IM_category.max, image=IM_category)
				//carrypixels(objects.Cytoplasm_border, "white", image=image)
				set(FieldImage=image)
				crop(X-50, Y-50,X+50, Y+50, image=image)
				set(CropImage=image)
				//convelems(image, size=1)
				if(OP_data==1)
					//writeimage(dir4&"\\"&wellindex&"_F"&i&"_x"&X&"_y"&Y&".jpg", image=result, imageformat="jpg")
					writeimage(dir4&"\\"&wellindex&"_F"&i&"_x"&X&"_y"&Y&".jpg", image=image, imageformat="jpg")
				end()
				// OP_data
		end()
		// d
	end()
	//objects.count>0
	//end()
	//// c<4
end()
// c
delete(image,IM_category,CategoriesCount,CoordinateTableX,objects,objects_all,objectstmp)
//delete(image,IM_category,Categories,CategoriesCount,CoordinateTableX,objects,objects_all,objects_category_1,objects_category_2,objectstmp)
//if(c==3)
//delete(objects_category_3)
//end()
////c==3
foreach(1..Categories.max, "c")
delete("objects_category_"&c)
end()
// c
delete(c, objectstart, objectend,Categories)
end()
// present well is in the coordinate table
end()
// IN_gallery
end()
// objects.count>0 (line407)

else() // do all the work below
//////////////////////////////////////////////////////////////////////////////////////////////////////////////////////////////////////////////////////////////////////////
// 2.3 - OBJECT SEGMENTATION AND INITIAL MEASUREMENTS
// 2.3.1 - NUCLEI DETECTION
//if(isFlex==1)
//	Set(IN_ROI =1)
//End()
nuclei_detection_select(IM_1, no)
calcattr(roundness, objects=nuclei)
renameattr(compact=roundness)
calcarea(border, objects=objects)
CalcWidthLength()
CalcIntensity(Image=IM_1, CalcStdDev=yes,objects=Objects)
set(Nuclei=objects)
// 2.3.2 - CYTOPLASM DETECTION
if(IN_cyto==0)
	cytoplasm_detection_a(IM_1, no)
	else()
	if(IN_CytoRef!=1 AND IN_CytoRef<(nCh+1))
	set(CytoRef=_["IM_"&IN_CytoRef])
	else()
	set(CytoRef=IM_1)
	end()
	// IN_CytoRef==1
	cytoplasm_detection_a(CytoRef, no)
	delete(CytoRef)
end()
CalcIntensity(Cytoplasm, IM_1, objects=Wholecells, CalcStdDev=yes)	// Code by Santosh 11/13/2013
SetAttr("int_cont", nuclei.intensity/Objects.Cytoplasm_intensity, objects=objects)
SetAttr("dev_cont", nuclei.intensity_stddev/Objects.Cytoplasm_intensity_stddev, objects=objects)
Set(Wholecells=Objects)
//IN_cyto
objectfilter(area>0, objects=wholecells)
deleteattr(area)

if(IN_remove!="Not used")
	removeborderobjects(3, stencil=_["objects."&IN_remove], objects=objects)
end()
//IN_remove
set(WholeCells=objects)

// 2.3.2.1 - MULTINUCLEUS DETECTION // adapted from multinucleation script courtesy Hind Azegrouz @ CNIC, Spain
if(IN_multinuc==1)
set(Nuclei1=Nuclei)
calcerosion(-1, border, NumberOfSteps=3, objects=WholeCells, RestrictiveStencil=WholeCells.body)
set(limit=objects.border_eroded.mask.image)
Inverse(image=limit)
set(limit=(image-254)*WholeCells.body.mask.image)
set(IM_nuc2=IM_1*limit)
Nuclei_Detection_Select_2(IM_nuc2, no)
CalcStat("max", AttrName="belongtocell", Image=WholeCells.index, objects=Nuclei) // determine to which cell each nucleus belongs
calcattr("belongtocell", "belongtocell-1") // correction for 0..n vs 1..n indexing (required?)
CalcMassCentre()
set(Nuclei2=objects) 
calcstat("sum", Image=Nuclei2.MassCentre.mask.image, objects=WholeCells, AttrName="multinucleicount")
set(WholeCells=objects)
set(Nuclei=Nuclei1)
delete(limit, IM_nuc2, Nuclei1)
	if(_imageview=="no")
	delete(Nuclei2)
	end()
	//_imageview
end()
//IN_multinuc

set(objects=WholeCells)
If(objects.count>0)
	
	ObjectFilter((int_cont>_.IN_cont) OR (dev_cont>_.IN_Cont))
	if((IN_imageONOFF==1) AND (IN_Cont!=0))
		ImageView(Objects.border, "Cells after contrast filter", image=IM_1)
	End()
	DeleteAttr(int_cont,dev_cont, cytoplasm_intensity, cytoplasm_intensity_stddev)
End()

if(objects.count>0)
set(fieldcount=fieldcount+1)
CalcMassCentre(objects=objects)
SetAttr("aaFieldofView", filledvec(objects.@count, i))
SetAttr("aaYcoord", objects.MassCentre.y.target)
SetAttr("aaXcoord", objects.MassCentre.x.target)
//if(IN_ROI==0) 
//Set(ROIdone=1)
//End()
//If(!defined("ROIdone"))
//	Set(IN_ROI=1)
//End()
// ^ comment out by Jarkko  2014/07/14
if(IN_ROI==1)
CalcMassCentre(centers, Weights=IM_1) // 20120330 - for ROI features
SetAttr("aaYDNAcoord", objects.centers_MassCentre.y.target) // 20120330 - for ROI features
SetAttr("aaXDNAcoord", objects.centers_MassCentre.x.target) // 20120330 - for ROI features
deleteattr("NumberOfNuclei", objects=objects)
end()
//
set(wholecells=objects)

//if(IN_RefSEG==1)
//	set(ChStart=1)
//	set(ChEnd=nCh)
//	else()
//	set(ChStart=2)
//	set(ChEnd=nCh)
//end()
//// IN_RefSEG==1
if(IN_RefSEG!=1)
	if(nCh>1)
	set(ChStart=2)
	set(ChEnd=nCh)
//set(ChEnd=2) // REMOVE THIS -- 20110323
	else()
	set(ChStart=1)
	set(ChEnd=nCh)
	end()
	// nCh>1
else()
set(ChStart=1)
set(ChEnd=nCh)
end()
// IN_RefSEG!=1


if(_imageview=="yes")
gamma(image=IM_1)
set(gammaIM_1=image)
//gamma(image=IM_nuc2)
//set(gammaIM_nuc2=image)

	imageview(WholeCells.centers_border, "Nuclei", image=gammaIM_1, title="Nuclei for feature extraction")
	imageview(WholeCells.border, "WholeCells", image=gammaIM_1, title="Cells for feature extraction")
	if(IN_multinuc==1)
		paint(WholeCells.border, image=gammaIM_1)
		imageview(Nuclei2.border, "Nuclei2", image=image, title="Nuclei from second detection procedure")
		delete(Nuclei2, image)
	end()
	//IM_multinuc
delete(gammaIM_1, image)
end()
//imageview

// 2.3.3 - SPOT DETECTION
if(IN_spots==1 OR IN_ROI==1)
set(wholecellstemp=wholecells)
set(stencilcount=1)
	if(IN_Stencil=="Nucleus and Cytoplasm" OR IN_Stencil=="All")
	Stencil2Objects(wholecells.centers)
	calcarea()
	set(WholeCells_1=objects)
	Stencil2Objects(wholecells.cytoplasm)
	calcarea()
	set(WholeCells_2=objects)
	set(stencilcount=2)
	end()
	// IN_Stencil = "Nucleus and Cytoplasm"
		if(IN_Stencil=="Nucleus")
		Stencil2Objects(wholecells.centers)
		calcarea()
		set(WholeCells_1=objects)
		end()
		// IN_Stencil = "Nucleus"
			if(IN_Stencil=="Cytoplasm")
			Stencil2Objects(wholecells.cytoplasm)
			calcarea()
			set(WholeCells_1=objects)
			end()
			// IN_Stencil = "Cytoplasm"
				if(IN_Stencil=="Cell")
				Stencil2Objects(wholecells.body)
				calcarea()
				set(WholeCells_1=objects)
				end()
				// IN_Stencil = "Cell"
foreach(ChStart..ChEnd, "j")
set(signal=_signal[j])
set(FieldImage=_["IM_"&j])
foreach(1..stencilcount, "e")

//if(stencilcount==2)
	//set(stencilx=_stencil[e+1])
	//else()
	set(stencilx=_stencil[e])
//end()
////stencilcount
set(objects_stenciltemp=_["WholeCells_"&e])
//if(defined("ROIdone")) // comment out by Jarkko  2014/07/14
//set(IN_ROI=0)
//end()
//

if(e==1)

if(IN_ROI==1)
	calcintensity(image=FieldImage, objects=wholecellstemp)
	CalcMassCentre(Weights=FieldImage) // 20120330 - for ROI features
	renameattr(MassCentre_weighted=MassCentre) // 20120330 - for ROI features
	SetAttr("fluorYweighted", objects.MassCentre_weighted.y.target) // 20120330 - for ROI features
	SetAttr("fluorXweighted", objects.MassCentre_weighted.x.target) // 20120330 - for ROI features
	CalcErosion(-4, border, RestrictiveStencil=body)
	else()
	calcintensity(image=FieldImage, objects=objects_stenciltemp)
end()
// ROI==1
//calcintensity(image=FieldImage, objects=objects_temp)
calcarea()
set(objects_temp=objects)

// 2.3.3.2 - LARGE SPOTS // adapted from MBFACA001 made for Sandra Nelson in March 2010 // modified for ROI features March 2012
if(IN_ROI==1)
foreach(0..objects_temp.count-1, "c") // detect "large spots" one object at a time; c = cell counter
	set(body=objects_temp[c].body) // 
	Mask2Stencil(body) // convert mask of object #c to stencil..
	Stencil2Objects(Stencil) // .. and stencil to objectlist
	calcarea() // calculating area for the cell mask
	calcintensity(image=FieldImage, Total=no) // calculating intensity for the cell mask
	set(singleobject_temp=objects)
	set(singleimage=FieldImage*body.image) // define image to include signal found within current cell mask
	set(ROIthreshold=IN_ROIint*singleobject_temp.intensity.mean)
	// Modification Introduced By Santosh 11/6/2013
	//cluster(IN_ROIarea, ROIthreshold, singleimage) // identify bright regions above given threshold, ie ROI
	Mask(threshold=ROIthreshold, image=singleimage)	// Santosh 11/6/2013
	Mask2Stencil()
	Stencil2Objects()
	CalcArea()
	CalcFillStencil()
	RenameAttr(unfilled=body)
	RenameAttr(body=filled)
	calcattr(roundness)
	if(IN_ROIarea>0)
		objectfilter(area>IN_ROIarea) // Area filter
	end()
	if(IN_ROIround>0)
		objectfilter(roundness>IN_ROIround) // roundness filter
	end()
	set(ROI=objects)
if(ROI.count>0)
	
	//objectfilter(area<objects_temp[c].area) // area filter
	
	calcattr("wholecell_index", &c) // assign index for corresponding cell mask
	calcattr("wholecell_X", &objects_temp.fluorXweighted[c])
	calcattr("wholecell_Y", &objects_temp.fluorYweighted[c])
	calcattr("nuclei_X", &wholecellstemp.aaXDNAcoord[c])
	calcattr("nuclei_Y", &wholecellstemp.aaYDNAcoord[c])
	calcintensity(Stencil=unfilled,image=singleimage, total=no) // ROI intensity
	renameattr(ROIintensity=unfilled_intensity)
	CalcArea(Stencil=unfilled)
	calcattr("ROItransparency", unfilled_area/objects_temp.area[c])
	
	 // ROI roundness -- may be used for filter below if only the roundest objects are of interest
	calcarea(border) // ROI perimeter
	renameattr(perimeter=border_area)
	CalcMassCentre(Weights=FieldImage) // as calculated for X and Y in v0_16
	SetAttr("clusterYcoord", objects.MassCentre.y.target)
	SetAttr("clusterXcoord", objects.MassCentre.x.target)
	calcattr("COFdistance", sqrt((clusterXcoord-wholecell_X)^2+(clusterYcoord-wholecell_Y)^2))
	calcattr("COFdistance_nuclei", sqrt((clusterXcoord-nuclei_X)^2+(clusterYcoord-nuclei_Y)^2))
	
	set(ROI=objects)
	// Compute Overlap with Cell Border, Perinuclear Border & Nuclear Area	
	And(mask=ROI.unfilled.mask,image=objects_temp[c].border_eroded)// Membrane Overlap	
	CalcIntensity(Stencil = unfilled,image = image, objects=Objects,Total=yes)
	RenameAttr(edgeoverlap = unfilled_intensity)	
	
	
	And(mask=Objects.unfilled.mask,image=objects_temp[c].centers)//Nuclear Overlap
	CalcIntensity(Stencil = unfilled,image = image, objects=Objects,Total=yes)
	RenameAttr(nucoverlap = unfilled_intensity)
	set(ROI=objects)
	
	//End Compute Overlap Code

	mask(ROIthreshold, image=singleimage)
	inverse(image=mask, dynamic=yes)
	
	set(eulert=image*ROI.body.mask.image)
	//set(eulert=image*ROI.Filled.mask.image)
	cluster(1, 1, eulert)
	set(eulerT=objects)
	minimums(2, Mask=ROI.body, Image=singleimage, StrictMinimums=yes)
	set(eulerM=singleimage*minimums.mask.image)
	calcintensity(Image=minimums.mask.image, objects=ROI, Total=yes)
	renameattr(eulerM_count=intensity)
	calcintensity(Image=eulerM, Total=yes)	
	renameattr(eulerM_totalintensity=intensity)
	set(ROI=objects)
		foreach(0..ROI.count-1, "em")
			if(ROI.eulerM_count[em]>0)
				push(_eulerMint, ROI.eulerM_totalintensity[em]/ROI.eulerM_count[em])
				else()
				push(_eulerMint, 0)
			end()
			//if(SCC.eulerM_count[em]>0)
	// Fit ellipse to Objects Based on second moments - "Fitting an ellipse to an arbitrary shape: implications for strain analysis"  Journal of Structural Geology 26 (2004) 143–153. Developed By Santosh 4/26/2012
			CompAny(" (ROI[em].body.x - ROI[em].clusterXcoord)^2")
			//Set(diff_sq_Xtemp_sum = (ROI[em].body.x - ROI[em].clusterXcoord)^2)
			Set(diff_sq_Xtemp_sum=(result.sum)/ROI[em].area)
			//Set(diff_sq_Ytemp_sum = (ROI[em].body.y - ROI[em].clusterYcoord)^2)
			CompAny(" (ROI[em].body.y - ROI[em].clusterYcoord)^2")
			Set(diff_sq_Ytemp_sum=(result.sum)/ROI[em].area)
			Mul((ROI[em].body.y - ROI[em].clusterYcoord),(ROI[em].body.x - ROI[em].clusterXcoord))
			Set(diff_sq_XYtemp_sum = result.sum/ROI[em].area)
				
			Set(com  = sqrt((diff_sq_Xtemp_sum-diff_sq_Ytemp_sum)^2+(4*diff_sq_XYtemp_sum^2)) )
			Set(MajorAxisTmp = sqrt(2*(diff_sq_Xtemp_sum+diff_sq_Ytemp_sum+com)/(ROI[em].area)))
			Set(MinorAxisTmp = sqrt(2*(diff_sq_Xtemp_sum+diff_sq_Ytemp_sum-com)/(ROI[em].area)))
			Set(eccentricityTmp = sqrt(MajorAxisTmp^2-MinorAxisTmp^2)/ MajorAxisTmp)
							
			Push(_majorAxis,MajorAxisTmp)
			Push(_minoraxis,MinorAxisTmp)
			Push(_eccentricity,eccentricityTmp)		
		end()
		SetAttr("eccentricity", _eccentricity, objects=ROI)
		Set(ROI = Objects)
		Delete(_eccentricity,_minoraxis,_majorAxis)
		//foreach(0..SCC.count-1, "em")
end()
// ROI.count>0
	if(ROI.count>0) // collect ROI attributes into vectors
		push(_ROIcount, ROI.count)
		push(_ROIarea, ROI.area.mean)
		push(_ROIareasum, ROI.area.sum)
		push(_ROIMemoverlap, ROI.edgeoverlap.sum/ROI.area.sum)
		push(_ROINucoverlap, ROI.nucoverlap.sum/ROI.area.sum)
		push(_ROIintensity, ROI.ROIintensity.mean)
		push(_ROIperimeter, ROI.perimeter.mean)
		push(_ROIroundness, ROI.roundness.mean)
		push(_ROIcof, ROI.COFdistance.mean)
		push(_ROIcof_nuclei, ROI.COFdistance_nuclei.mean)
		push(_ROIeulerT, ROI.count-eulerT.count)
		push(_ROIeulerM, ROI.count-ROI.eulerM_count.sum)
		push(_ROItransparency, ROI.ROItransparency.mean)
		Push(_ROIeccentricity,ROI.eccentricity.mean)
		if(ROI.count>1) // more than one ROI detected
			push(_ROIareavar, ROI.area.stddev^2)
			push(_ROIarearatio, (ROI.area.max/ROI.area.min))
			push(_ROIcofvar, ROI.COFdistance.stddev^2)
			push(_ROIcofvar_nuclei, ROI.COFdistance_nuclei.stddev^2)
			If(ROI.COFdistance.min == 0)
				push(_ROIcofratio, 0)
			Else()
				push(_ROIcofratio, (ROI.COFdistance.max/ROI.COFdistance.min))
			End()
			If(ROI.COFdistance_nuclei.min==0)
				push(_ROIcofratio_nuclei, 0)
			Else()
				push(_ROIcofratio_nuclei, (ROI.COFdistance_nuclei.max/ROI.COFdistance_nuclei.min))
			End()
			else()
			push(_ROIareavar, 0)
			push(_ROIarearatio, 0)
			push(_ROIcofvar, 0)
			push(_ROIcofratio, 0)
			push(_ROIcofvar_nuclei, 0)
			push(_ROIcofratio_nuclei, 0)
		end()
		// if(objects.count>1)
		if(defined("ROITemp"))
			addobjects(ROI, CheckOverlap=no, DeleteGeometry=no, objects=ROItemp) // collect ROI attributes into objectlist
			set(ROITemp=objects)
		else()
			set(ROITemp=ROI)
		end()
		// if defined ROI
	else() // ie no ROI scored
		push(_ROIcount, 0)
		push(_ROIarea, 0)
		push(_ROIareasum, 0)
		push(_ROIMemoverlap, 0)
		push(_ROINucoverlap,0)
		push(_ROIareavar, 0)
		push(_ROIarearatio, 0)
		push(_ROIintensity, 0)
		push(_ROIperimeter, 0)
		push(_ROIroundness, 0)
		push(_ROIcof, 0)
		push(_ROIcofvar, 0)
		push(_ROIcofratio, 0)
		push(_ROIcof_nuclei, 0)
		push(_ROIcofvar_nuclei, 0)
		push(_ROIcofratio_nuclei, 0)
		push(_ROIeulerT, 0)
		push(_ROIeulerM, 0)
		push(_ROItransparency, 0)
		Push(_ROIeccentricity,0)
	end()
	//if objects.count>0
end()
// foreach c
if(IN_ImageONOFF==1)
	ImageView(FieldImage, signal)
	If(ROITemp.count>0)
		ImageView(ROITemp.body, "ROI Ch"&j, image=FieldImage)
	end()
end()

set(stencilx2="cell") // for clarity - 20120402
set(_["wholecellstemp."&signal&"_MOR_"&stencilx2&"_ROI_Count"]=_ROIcount)
set(_["wholecellstemp."&signal&"_MOR_"&stencilx2&"_ROI_AvgArea"]=_ROIarea)
set(_["wholecellstemp."&signal&"_MOR_"&stencilx2&"_ROI_SumArea"]=_ROIareasum)
set(_["wholecellstemp."&signal&"_MOR_"&stencilx2&"_ROI_MemOverlap"]=_ROIMemoverlap)
set(_["wholecellstemp."&signal&"_MOR_"&stencilx2&"_ROI_NucOverlap"]=_ROINucoverlap)
set(_["wholecellstemp."&signal&"_MOR_"&stencilx2&"_ROI_AvgPerimeter"]=_ROIperimeter)
set(_["wholecellstemp."&signal&"_MOR_"&stencilx2&"_ROI_AvgRoundness"]=_ROIroundness)
set(_["wholecellstemp."&signal&"_MOR_"&stencilx2&"_ROI_AvgIntensity"]=_ROIintensity)
set(_["wholecellstemp."&signal&"_MOR_"&stencilx2&"_ROI_COFcell"]=_ROIcof)
set(_["wholecellstemp."&signal&"_MOR_"&stencilx2&"_ROI_COFnuclei"]=_ROIcof_nuclei)
set(_["wholecellstemp."&signal&"_MOR_"&stencilx2&"_ROI_EulerT"]=_ROIeulerT)
set(_["wholecellstemp."&signal&"_MOR_"&stencilx2&"_ROI_EulerM"]=_ROIeulerM)
set(_["wholecellstemp."&signal&"_MOR_"&stencilx2&"_ROI_AreaVariance"]=_ROIareavar)
set(_["wholecellstemp."&signal&"_MOR_"&stencilx2&"_ROI_AreaRatio"]=_ROIarearatio)
set(_["wholecellstemp."&signal&"_MOR_"&stencilx2&"_ROI_COFcellVariance"]=_ROIcofvar)
set(_["wholecellstemp."&signal&"_MOR_"&stencilx2&"_ROI_COFnucleiVariance"]=_ROIcofvar_nuclei)
set(_["wholecellstemp."&signal&"_MOR_"&stencilx2&"_ROI_COFcellRatio"]=_ROIcofratio)
set(_["wholecellstemp."&signal&"_MOR_"&stencilx2&"_ROI_COFnucleiRatio"]=_ROIcofratio_nuclei)
set(_["wholecellstemp."&signal&"_MOR_"&stencilx2&"_ROI_Transparency"]=_ROItransparency)
set(_["wholecellstemp."&signal&"_MOR_"&stencilx2&"_ROI_Transparency"]=_ROIeccentricity)
Delete(_ROICount,_ROIarea,_ROIareasum,_ROIMemoverlap,_ROINucoverlap,_ROIperimeter,_ROIroundness,_ROIintensity,_ROIcof,_ROIcof_nuclei,_ROIeulerT,_ROIeulerM,_ROIareavar,_ROIarearatio,_ROIcofvar,_ROIcofvar_nuclei,_ROIcofratio,_ROIcofratio_nuclei,_ROItransparency,_ROIeccentricity,)
if(defined("ROITemp"))
	set(_["ROI_"&stencilx2]=ROITemp)
end()
//ROITemp
//set(ROIdone=1) // comment out by Jarkko  2014/07/14

end()
// if IN_ROI == 1

end()
//e==1

// 2.3.3.1 - SMALL SPOTS
if(IN_spots==1)
spot_detection_a(FieldImage, "body", no, ShowOutputParameters=no, WholeCells=objects_stenciltemp)
if(defined("ROITemp"))
Inverse(image=ROITemp.body.mask.image) // adjust small spot count from Spot_Detection procedure above to remove overlap with ROI
set(image=image-254)
set(SpotCorrection=WholeCells.SpotCenters.mask.image*image)
Mask(image=SpotCorrection)
Mask2Stencil()
Stencil2Objects()
CalcMassCentre()
set(SpotCorrection=objects.MassCentre.mask.image)
calcintensity(body, SpotCorrection, objects=WholeCells, Total=yes)
RenameAttr(SmallSpotCount=intensity)
RenameAttr(SmallSpotAverageIntensity=SpotAverageCenterIntensity)
DeleteAttr(SpotsArea)	// adjust NumberOfSpots to include Large Spots but not Small Spots that coincide with the Large Spot masks
//calcattr(NumberOfSpots, LargeSpots.count+SmallSpotCount) // adjust NumberOfSpots to include Large Spots but not Small Spots that coincide with the Large Spot masks
set(WholeCellsSpotCorrected=objects) // WholeCell objectlist including spot data (but not all spot stencils)
else()
RenameAttr(SmallSpotCount=NumberOfSpots, objects=wholecells)
RenameAttr(SmallSpotAverageIntensity=SpotAverageCenterIntensity)
end()
// defined ROITemp
set(SmallSpots=spots)
delete(integratedspotsignalperarea)
set(_["SmallSpots_"&stencilx]=SmallSpots)

if(IN_ImageONOFF==1)
//foreach(ChStart..ChEnd, "j2")
	gamma(image=FieldImage)
	ImageView(image, signal)
	if(defined("SmallSpots"))
		set(spotstemp1=_["SmallSpots_"&stencilx])
		convert(2, image=spotstemp1.border.mask.image) // output image of small spots into Acapella Player window
		set(IM_SpotMask=image)
		gamma(image=FieldImage)
		set(IM_Jadjusted=image)
		paint(IM_SpotMask, image=IM_Jadjusted)
		set(_["IM_view_small"&j]=image)
		imageview(_["IM_view_small"&j], "SmallSpots_"&stencilx&"_Ch"&j, delay@s=1)
		delete(spotstemp1)
	end()
	// defined smallspots
//	if(defined("ROITemp"))
//		set(spotstemp2=_["ROI_"&stencilx2])
//		convert(2, image=spotstemp2.border.mask.image) // output image of large spots into Acapella Player window
//		gamma(image=_["IM_"&j2])
//		set(IM_Jadjusted=image)
//		paint(image, image=IM_Jadjusted)
//		set(_["IM_view_large"&j2]=image)
//		imageview(_["IM_view_large"&j2], "ROI_"&stencilx&"_Ch"&j2, delay@s=1)
//		delete(_["IM_view_large"&j2], image, spotstemp2)
//	end()
//	// defined ROITemp
		delete(image, _["IM_view_small"&j], IM_SpotMask, IM_Jadjusted, SpotCorrection)
//end()
//// j2
//delete(j2)
end()
// if(IN_ImageONOFF==1)

end()
// IN_spots==1


// 2.3.3.3 - ADD SPOT DATA TO WHOLECELL OBJECT LISTS

// 2.3.3.3.3 - RENAMING OF ATTRIBUTES
//calcattr(spots_countestimate, objects.Spots_small_count[objectindex]+objects.Spots_large_count[objectindex])
if(IN_spots==1)
	set(_["wholecellstemp."&signal&"_MOR_"&stencilx&"_Spots_Small_Count"]=objects.SmallSpotCount)	
	set(_["wholecellstemp."&signal&"_INT_"&stencilx&"_Spots_Small_AvgIntensity"]=objects.SmallSpotAverageIntensity)
	//foreach(0..objects.count-1, "c")	
	//	//push(_totalspot, objects.SmallSpotCount[c]+_LScount[c])
	//	push(_totalspot, objects.SmallSpotCount[c])
	//end()
	//// c
	//delete(c)
	//set(_["wholecellstemp."&signal&"_MOR_"&stencilx&"_Spots_Total_Count"]=_totalspot)
	//delete(_totalspot)
//	end()
//	// IN_Spots==1
//	else()
	//set(_["wholecellstemp."&signal&"_MOR_"&stencilx&"_Spots_Small_Count"]=wholecells.NumberOfSpots)	
	//set(_["wholecellstemp."&signal&"_INT_"&stencilx&"_Spots_Small_AvgIntensity"]=wholecells.SpotAverageCenterIntensity)
end()
// IN_spots==1
//delete(_LSarea, _LScount, _LSintensity, _LSperimeter, _LSroundness, _totalspot)


// PER FIELD OUTPUTS //

if(defined("ROITemp"))
delete(ROITemp)
end()
// defined ROITemp
if(defined("SmallSpots"))
delete(SmallSpots)
end()
// defined SmallSpots
end()
// foreach stencil "e"

delete(FieldImage, e)
end()
// foreach ch
delete(j, stencilcount)

//deleteattr(aaXDNAcoord, objects=objects_temp)
//deleteattr(aaYDNAcoord)
//set(objects_temp=objects)

//deleteattr(aaXDNAcoord, objects=wholecellstemp)
//deleteattr(aaYDNAcoord)
//set(wholecellstemp=objects)

//deleteattr(aaXDNAcoord, objects=wholecells)
//deleteattr(aaYDNAcoord)
//set(WholeCells=objects)

set(WholeCells=wholecellstemp)
// 2.3.3.3.4 - EXPLORER CLEANUP
if(IN_cleanup==1)
Delete(image, body, objects, objects_temp, objects_stenciltemp, wholecellstemp, WholeCells_1, WholeCells_2, WholeCells_3, Stencil, SpotCorrection, mask, SpotCandidates, Spots, NumberOfSpotCandidates, NumberOfSpots,SpotsPerArea,SpotsPerObject,Spots_large_counter,Spots_small_counter,spots_large_area,spots_small_area, integratedspotssignalperarea, integratedspotsignalperarea_backgroundsubtracted, integratedspotsignalpercellularsignal, integratedspotsignalpercellularsignal_backgroundsubtracted, distance_vector, thld, ItemCount)
if(IN_Spots==1)
delete(WholeCellsSpotCorrected)
end()
//IN_Spots==1
end()
// cleanup
//Delete(ROIdone) // comment out by Jarkko  2014/07/14
end()
// IN_spots
//////////////////////////////////////////////////////////////////////////////////////////////////////////////////////////////////////////////////////////////////////////
// 2.4 - INTENSITY MEASUREMENTS
// 2.4.1 - INTENSITY BY COMPARTMENT
if(IN_intensity==1)
foreach(1..nCh, "j") // foreach channel
	set(signal=_signal[j])
	set(image=_["IM_"&j])
	if(IN_Stencil == "All" OR IN_Stencil == "Cell")
		calcintensity(body, image, CalcStdDev=yes, objects=WholeCells)
		set(_["wholecells."&signal&"_INT_Cell_intensity"]=objects.intensity)
		set(_["wholecells."&signal&"_INT_Cell_intensity_stddev"]=objects.intensity_stddev)
		deleteattr(intensity_stddev, objects=objects)
	end()
	// IN_Stencil = All or Cell
	if(IN_Stencil == "All" OR IN_Stencil == "Nucleus and Cytoplasm" OR IN_Stencil == "Nucleus")
		calcintensity(centers, image, CalcStdDev=yes, objects=WholeCells)
		set(_["wholecells."&signal&"_INT_Nucleus_intensity"]=objects.centers_intensity)
		set(_["wholecells."&signal&"_INT_Nucleus_intensity_stddev"]=objects.centers_intensity_stddev)
	end()
		// IN_Stencil = All, Nucleus & Cytoplasm, or Nucleus
	if(IN_Stencil == "All" OR IN_Stencil == "Nucleus and Cytoplasm" OR IN_Stencil == "Cytoplasm")
		calcintensity(Cytoplasm, image, CalcStdDev=yes, objects=WholeCells)
		set(_["wholecells."&signal&"_INT_Cytoplasm_intensity"]=objects.cytoplasm_intensity)
		set(_["wholecells."&signal&"_INT_Cytoplasm_intensity_stddev"]=objects.cytoplasm_intensity_stddev)
	end()

				// IN_Stencil = All, Nucleus & Cytoplasm, or Cytoplasm
	set(objects=wholecells)
	foreach(1..9, "u")
		set(quant=u/10)
		if(IN_Stencil == "All" OR IN_Stencil == "Cell")
		CalcStat("quantile", quant, body, Image=image)
		set(_["wholecells."&signal&"_INT_Cell_quantile"&(u*10)]=_["objects.quantile"])
		end()
			if(IN_Stencil == "All" OR IN_Stencil == "Nucleus and Cytoplasm" OR IN_Stencil == "Nucleus")
			CalcStat("quantile", quant, centers, Image=image)
			set(_["wholecells."&signal&"_INT_Nucleus_quantile"&(u*10)]=_["objects.quantile"])
			end()
				if(IN_Stencil == "All" OR IN_Stencil == "Nucleus and Cytoplasm" OR IN_Stencil == "Cytoplasm")
				CalcStat("quantile", quant, cytoplasm, Image=image)
				set(_["wholecells."&signal&"_INT_Cytoplasm_quantile"&(u*10)]=_["objects.quantile"])
				end()
	end()
	//foreach u
	if(IN_Zone==1) // create perinuclear zone
		Stencil2Objects(wholecells.centers)
		calczone(IN_ZoneCount, objects=objects, ZoneType="standard")
		zonemask(filt_low=-1, filt_high=-3)
		renameattr(Nucleus_outerzone=zonemask)
		set(WholeCells_CentersZone=objects)
		calcintensity(nucleus_outerzone, image, CalcStdDev=yes, objects=WholeCells_CentersZone)
		set(_["wholecells."&signal&"_INT_PerinuclearZone_intensity"]=objects.nucleus_outerzone_intensity)
		set(_["wholecells."&signal&"_INT_PerinuclearZone_intensity_stddev"]=objects.nucleus_outerzone_intensity_stddev)
		if(IN_cleanup==1)
			delete(WholeCells_CentersZone)
		end()
		// cleanup
	end()
	// if IN_Zone=1
end()
// intensities of each channel

end()
// if(IN_intensity==1)
//////////////////////////////////////////////////////////////////////////////////////////////////////////////////////////////////////////////////////////////////////////
// 2.5 - MORPHOLOGY MEASUREMENTS
if(IN_morph==1)
set(objects=wholecells)
// 2.5.1 - COMPACTNESS 
if(IN_Stencil == "All" OR IN_Stencil == "Cell")
calcattr(roundness, objects=objects)
renameattr(Ch1_MOR_Cell_compact=roundness)
end()
// IN_Stencil == "All" OR IN_Stencil == "Cell")
if(IN_Stencil == "All" OR IN_Stencil == "Nucleus and Cytoplasm" OR IN_Stencil == "Nucleus")
calcattr(Ch1_MOR_Nucleus_compact, nuclei.compact[objectindex])
end()
// IN_Stencil = All, or Nucleus & Cytoplasm, or Nucleus
// 2.5.2 - AREA AND PERIMETER
if(IN_Stencil == "All" OR IN_Stencil == "Cell")
calcarea(border)
renameattr(Ch1_MOR_Cell_area=area, Ch1_MOR_Cell_perimeter=border_area)
calcattr(Ch1_MOR_Cell_perim2area, objects.Ch1_MOR_Cell_perimeter[objectindex]/objects.Ch1_MOR_Cell_area[objectindex])
end()
// IN_Stencil == All, Cell
	if(IN_Stencil == "All" OR IN_Stencil == "Nucleus and Cytoplasm" OR IN_Stencil == "Nucleus")
	calcattr(Ch1_MOR_Nucleus_perimeter, nuclei.border_area[objectindex])
	calcarea(centers)
	renameattr(Ch1_MOR_Nucleus_area=centers_area)
	calcattr(Ch1_MOR_Nucleus_perim2area, objects.Ch1_MOR_Nucleus_perimeter[objectindex]/objects.Ch1_MOR_Nucleus_area[objectindex])
	end()
	// IN_Stencil = All, Nuc & Cyto, Nucleus
		if(IN_Stencil == "All" OR IN_Stencil == "Nucleus and Cytoplasm" OR IN_Stencil == "Cytoplasm")
		calcarea(cytoplasm)
		renameattr(Ch1_MOR_cytoplasm_area=cytoplasm_area)
		calcarea(cytoplasm_border)
		renameattr(Ch1_MOR_cytoplasm_perimeter=cytoplasm_border_area)
		calcattr(Ch1_MOR_cytoplasm_perim2area, objects.Ch1_MOR_cytoplasm_perimeter[objectindex]/objects.Ch1_MOR_cytoplasm_area[objectindex])
		end()
		// IN_Stencil = all, nuc & cyto, cytoplasm
// 2.5.3 - WIDTH AND LENGTH
if(IN_Stencil == "All" OR IN_Stencil == "Cell")
CalcWidthLength()
renameattr(Ch1_MOR_Cell_fulllength=full_length, Ch1_MOR_Cell_halfwidth=half_width)
end()
// if(IN_Stencil == "All" OR IN_Stencil == "Cell")
if(IN_Stencil == "All" OR IN_Stencil == "Nucleus and Cytoplasm" OR IN_Stencil == "Nucleus")
calcattr(Ch1_MOR_Nucleus_fulllength, nuclei.full_length[objectindex])
calcattr(Ch1_MOR_Nucleus_halfwidth, nuclei.half_width[objectindex])
end()
// if(IN_Stencil == "All" OR IN_Stencil == "Nucleus and Cytoplasm" OR IN_Stencil == "Nucleus")
if(IN_multinuc==1)
renameattr(Ch1_MOR_Nucleus_multinucleicount=multinucleicount)
end()
//IN_multinuc
set(wholecells=objects)
end()
// if(IN_morph==1)
//////////////////////////////////////////////////////////////////////////////////////////////////////////////////////////////////////////////////////////////////////////
// 2.6 - TEXTURE FEATURE MEASUREMENTS
if(IN_RefTXT==1)
	set(ChStart=1)
	set(ChEnd=nCh)
	else()
	set(ChStart=2)
	set(ChEnd=nCh)
end()
// IN_RefTXT==1
// 2.6.1 - STENCIL ASSIGNMENTS
if(IN_Haralick==1 OR IN_TAS==1 OR IN_RadMom==1)
if(IN_Stencil=="All")
Stencil2Objects(wholecells.centers)
calcarea()
set(WholeCells_1=objects)
Stencil2Objects(wholecells.cytoplasm)
calcarea()
set(WholeCells_2=objects)
Stencil2Objects(wholecells.body)
calcarea()
set(WholeCells_3=objects)
end()
// IN_Stencil = all
	if(IN_Stencil=="Nucleus and Cytoplasm")
	Stencil2Objects(wholecells.centers)
	calcarea()
	set(WholeCells_1=objects)
	Stencil2Objects(wholecells.cytoplasm)
	calcarea()
	set(WholeCells_2=objects)
	end()
	// IN_Stencil = "Nucleus and Cytoplasm"
		if(IN_Stencil=="Nucleus")
		Stencil2Objects(wholecells.centers)
		calcarea()
		set(WholeCells_1=objects)
		end()
		// IN_Stencil = "Nucleus"
			if(IN_Stencil=="Cytoplasm")
			Stencil2Objects(wholecells.cytoplasm)
			calcarea()
			set(WholeCells_1=objects)
			end()
			// IN_Stencil = "Cytoplasm"
				if(IN_Stencil=="Cell")
				Stencil2Objects(wholecells.body)
				calcarea()
				set(WholeCells_1=objects)
				end()
				// IN_Stencil = "Cell"
foreach(ChStart..ChEnd, "j") // foreach channel
set(signal=_signal[j])
set(image00=_["IM_"&j])
foreach(1.._stencil.size-1, "e")
set(stencilx=_stencil[e])
set(objects00=_["WholeCells_"&e])
set(signal=_signal[j])
// 2.6.2 - MOMENTS
if(IN_RadMom==1)
foreach(2..5, "v")
	CalcMoment(v, Image=image00, objects=objects00)
	set(_["wholecells."&signal&"_TXT_"&stencilx&"_moment"&v]=_["objects.moment"&v])
end()
//foreach v
// Radial Moments -- Created by Sean Cianflone, DWA lab, June 11, 2008; adapted from MBF_texture_suite.proc lines #495-553 by Jarkko Ylanko, MBF, December 9, 2010
foreach(1..2, "i3")
	if(i3==1)
		set(type="center")
		else()
		set(type="border")
	end()
	// if i3
set(original=image00)
set(ROI_obj=objects00)
set(k=2)
calcstat("sum", stencil=ROI_obj.body, image=original)
rename(ROI_obj_sum=objects)
calczone(objects=ROI_obj, Stencil=body, ZoneType="standard")
	zoneimage(objects=objects)
	set(radial=zoneimage)	
CalcStat("max", Image=radial, objects=ROI_obj)
	set(ROI_obj=objects)
blank(original.width, original.height, 1)
convelems(image, "float", nonnumeric=0)
carryobjects(ROI_obj.body, ROI_obj.max, image=result)
rename(maxzone=image)
set(stdradial=radial/maxzone)
set(stdborderrad=((-1)*stdradial)+1)
set(direction="C")
if(type=="border")
	set(direction="B")
	set(radimage=stdborderrad)
			else()
			if(type=="center")
				set(radimage=stdradial)
			end()
end()
// type definition
set(baseimage=radimage)
foreach(1..k, "i2")
	set(_["mult"&0]=1)
	set(_["mult"&i2]=baseimage*_["mult"&(i2-1)])
end()
//i2 - set
set(image=_["mult"&k])
foreach(1..k, "i2")
	delete(_["mult"&i2])
end()
//i2 - delete
delete(_["mult"&0], i2)
set(expedimage=image)
calcintensity(Image=expedimage*original, Total=yes, objects=ROI_obj)
blank(original.width, original.height, 0)
convelems(image, "float", nonnumeric=0)
carryobjects(ROI_obj.body, objects.intensity, image=result)
set(radmoment=image)
setAttr("Radial"&direction&k, objects.intensity/ROI_obj_sum.sum, objects=ROI_obj)
rename(radialmom_obj=objects)
DeleteAttr(max, objects=radialmom_obj)
delete(appliedshift,baseimage,direction,expedimage,k,maxzone,non_numerics_count,original,radial,radialmom_obj,radimage,radmoment,result,ROI_obj,ROI_obj_sum,stdborderrad,stdradial,v,ZoneImage)
	if(i3==1)
		set(_["WholeCells."&signal&"_TXT_"&stencilx&"_RadialC2"]=_["objects.RadialC2"])
		else()
		set(_["WholeCells."&signal&"_TXT_"&stencilx&"_RadialB2"]=_["objects.RadialB2"])
	end()
	// if i3==1
end()
// i3
delete(v,i3, type)
end()
// if IN_RadMom = 1
// 2.6.3 - HARALICK FEATURES
if(IN_Haralick==1)
foreach(1..IN_HarStepNum, "r")
// Haralick Features - Created by Tony Collins, MBF, 2008; adapted from MBF_texture_suite.proc lines #1-146 by Jarkko Ylanko, MBF, December 13, 2010
	set(objects_in=objects00)
	set(in_image=image00)
	set(im_ref=image00)
	set(step=r)
	set(orientation="east") 
		if(orientation=="north")
			set(xstep=0)
			set(ystep=-step)
		end()
		// north
			if(orientation=="east")
				set(xstep=step)
				set(ystep=0)
			end()
			// east
				if(orientation=="south")
					set(xstep=0)
					set(ystep=step)
				end()
				// south
					if(orientation=="west")
						set(xstep=-step)
						set(ystep=0)
					end()
					// west
	if(im_ref.elemtype==5) // if unsigned char 
		set(signalHARALICK=im_ref)
		set(signalHARALICK.factor=1)
		else()
		convelems(im_ref, size=1, shiftnegative=yes, clipoutofrange=no, neginfinity=0, nonnumeric=0, allowfactorchange=1 )
		set(signalHARALICK=result)
		set(signalHARALICK.factor=1)
	end()
	// elemtype==5
	set(maxshift=iif(abs(xstep)>abs(ystep), abs(xstep), abs(ystep)))
	if(maxshift>1)
		blank(im_ref.width,im_ref.height,1)
		rectmask((abs(xstep)-xstep)/2, (abs(ystep)-ystep)/2, im_ref.width-(abs(xstep)+xstep)/2, im_ref.height-(abs(ystep)+ystep)/2,image=image)
		and(image=objects_in.body.image,mask=mask.image)
		Stencil2Objects(image)
		set(objects_corrected=objects_in)
		else()
		set(objects_corrected=objects_in) 
	end()
	// maxshift>1
	set(kernelwidth=iif(abs(xstep)>abs(ystep), 2*abs(xstep)+1, 2*abs(ystep)+1))
	blank(kernelwidth,kernelwidth)
	set(image[(kernelwidth-1)/2+xstep,(kernelwidth-1)/2+ystep]=1)
	set(image.type="mask")
	set(kernel1=image.vector)
	convolution(image=signalHARALICK,convolutionkernel=kernel1)
	set(IM_neighbour=image) 
	mul(signalHARALICK, 256,result_type="unsigned,short")
	plus(result,IM_neighbour,result_type="unsigned,short")
	and(image=result,mask=objects_corrected.body.mask.image)
	set(result=image)
	set(result.type="stencil")
	stencil2objects(result) 
	calcarea()
	objectfilter(area>0) 
	calcstat("max", attrname="I_pixel",stencil=body, image=signalHARALICK) 
	calcstat("max", attrname="I_neighbour",stencil=body, image=IM_neighbour) 
	set(IM_IntensityPairs=objects.body.image) // hold on - from line 82 of RC57, aka line 85 from RC117	
	deleteattr(area,body,border,index)  
	set(OL_IntensityPairs=objects) 
	Foreach(0..objects_corrected.count-1,"i2") 
		objectfilter(objectindex==i2,objects=objects_corrected)
		set(ObjectArea=objects.area.sum)
		and(image= IM_IntensityPairs,mask=objects.body.mask.image)
		setattr(single_object,image.vector,objects=OL_IntensityPairs)
		calcarea(single_object)
		deleteattr(single_object)
		objectfilter(single_object_area) 
		calcattr(f,1.0*single_object_area/ObjectArea)
		calcattr(asm,f*f)
		calcattr(contrast, f*(i_pixel-I_neighbour)*(i_pixel-I_neighbour))
		calcattr(IDM, f/(1+(i_pixel-I_neighbour)*(i_pixel-I_neighbour)))
		calcattr(entropy,-f*ln(f))
		push(asm_vec, 1.0*objects.asm.sum)
		push(contrast_vec, 1.0*objects.contrast.sum)
		push(IDM_vec, 1.0*objects.IDM.sum)
		push(entropy_vec, 1.0*objects.entropy.sum)
		push(sum_vec, 1.0*objects.f.sum)
	end()
	set(Haralick_table=tbl("Haralick_ASM_"& step=asm_vec, "Haralick_contrast_" & step=contrast_vec, "Haralick_IDM_"&step=IDM_vec, "Haralick_entropy_"&step=entropy_vec, "Haralick_sum_"&step=sum_vec))
	set(_["WholeCells."&signal&"_TXT_"&stencilx&"_ASM_"&r]=_["haralick_table.Haralick_ASM_"&r])
	set(_["WholeCells."&signal&"_TXT_"&stencilx&"_contrast_"&r]=_["haralick_table.Haralick_contrast_"&r])
	set(_["WholeCells."&signal&"_TXT_"&stencilx&"_entropy_"&r]=_["haralick_table.Haralick_entropy_"&r])
	set(_["WholeCells."&signal&"_TXT_"&stencilx&"_IDM_"&r]=_["haralick_table.Haralick_IDM_"&r])
	delete("haralick_table",appliedshift,asm_vec,contrast_vec,entropy_vec,i2,IDM_vec,IM_IntensityPairs,IM_neighbour,im_ref,in_image,kernel1,kernelwidth,maxshift,non_numerics_count,ObjectArea,objects_corrected,objects_in,OL_Intensity,Pairs,orientation,result,step,sum_vec,xstep,ystep, signalHARALICK,OL_IntensityPairs)
end()
// foreach haralick step value r
delete(r)
end()
// if IN_Haralick=1
// 2.6.4 - TEXTURE ADJACENCY STATISTICS
//Timer(continue=true)
if(IN_TAS==1)
	if(IN_TRangeMode==3)
	push(_TRange, "", "0.2", "0.4") // percentage of starting point pixels with neighbours of 0/1 = 1
	end()
	// TRangeMode 1
	if(IN_TRangeMode==2)
	push(_TRange, "", "0.2", "0.4", "0.6", "0.8") // percentage of starting point pixels with neighbours of 0/1 = 1
	end()
	// TRangeMode 2
	if(IN_TRangeMode==1)
	push(_TRange, "", "0.1", "0.2", "0.3", "0.4", "0.5", "0.6", "0.7", "0.8", "0.9") // percentage of starting point pixels with neighbours of 0/1 = 1
	end()
	// TRangeMode 3
		if(IN_TASmode==1)
		push(_TASmode,"",1,2,3,4,5,6,7,8,9,10,11,12,13,14,15,16,17,18,19,20,21,22,23,24,25,26,27,28,29,30,31,32,33,34,35,36) // keep each TAS statistic
		end()
		//mode 1
		if(IN_TASmode==2)
		push(_TASmode,"",2,4,6,8,10,12,14,16,18,20,22,24,26,28,30,32,34,36) // keep every other statistic
		end()
		//mode 2
		if(IN_TASmode==3)
		push(_TASmode,"",3,6,9,12,15,18,21,24,27,30,33,36) // keep every third stat
		end()
		//mode 3
set(in_objects=objects00)
set(in_image=image00)
set(ratio_method="mean")
blank(3,3,1)
Set(image[1,1] = 10) // Use modified kernel instead of all 1
rename(kernel=image)
//set(removeNAN="false")
calcStat(ratio_method, Stencil=body, Image=in_image, objects=in_objects)
blank(in_image.width, in_image.height)
convelems(image, sign = "signed")
if(ratio_method=="mean")
	carryobjects(in_objects.body, objects.mean, image=result)
	else()
	carryobjects(in_objects.body, objects.median, image=result)
end()
// ratio_method=mean
set(img_avg=image)
div(in_image, image, result_type="float", infinity=0,uncertainty=0)
mask("inf", image=result)
mul(not(mask), result, result_type= "float")
set(ratio_image=result)
foreach(1.._TRange.size-1, "s")
	set(TRange=_TRange[s])
	set(TNum=100*TRange)
// Texture Adjacency Statistic - Created by Tony Collins, MBF, 2008; adapted from MBF_texture_suite.proc lines #239-355 by Jarkko Ylanko, MBF, December 13, 2010

set(range=TRange)
create("table")
// Get different Ranges - Santosh 8/1/2014
foreach(0..3, "i3")
	if(i3==0) 
		set(range_min=range)
		set(range_max=range)
			mask(1-range_min, image=ratio_image)
			set(mask1=mask)
			mask(1+range_max, image=ratio_image)
			set(mask2=mask)
			
	end()
	if(i3==1)
		set(range_min=range)
		set(range_max=ratio_image.max)
			mask(1-range_min, image=ratio_image)
			set(mask1=mask)
			mask(1+range_max, image=ratio_image)
			set(mask2=mask)
	end()
	if(i3==2)
		set(range_min=range)
		set(range_max=ratio_image.max)	
			mask(1+range_min, image=ratio_image)
			set(mask1=mask)
			mask(1+range_max, image=ratio_image)
			set(mask2=mask)
	end()
	if(i3==3)
		set(range_min=0)
		set(range_max=ratio_image.max)	
			mask(1-range_min, image=ratio_image)
			set(mask1=mask)
			mask(1+range_max, image=ratio_image)
			set(mask2=mask)
	end()
	minus(mask1, mask2)
	rename(mask_all=result)	
	// Convolute Images
	convolution(image=mask_all, ConvolutionKernel=kernel, Faster=yes, ConvolutionKernelFactor=1)
	Set(adj_img=image)
	calcstat("sum", AttrName="tas_mTotal", Stencil=body, Image=mask_all, objects=objects)
	mul(adj_img, mask_all)
	Set(adj_img = result)
	// All values from 10-18 mapped to 0-8 neighbours
	foreach(1..9, "p")
		//mask(p, image=_["adj_mask"&i3]) //OC
		//mask(p, image=_["adj_mask"&i3])
		//Set(rt = p+9)
		Set(mask = (adj_img== (p+9)))
		//set(mask3=mask)
		//mask(p+1, image=_["adj_mask"&i3])
		//rename(mask4=mask)
		//minus(mask3, mask4, neg_method="zero")
		//set(_["m"& p]=result)
		//set(_["m"& p]=mask)
		if((i3*9)+p<10) 
			set(pad="0")
			else()
			set(pad="")
		end()		
		calcstat("sum", AttrName="tas", Stencil=body, Image=mask, objects=objects)
		Set(cl_nan=Objects.tas/Objects.tas_mTotal)
		MakeNanMap(cl_nan)
		ApplyNanMap(cl_nan, neginfinity=0, posinfinity=0)
		//SetAttr("tas"& pad & (i3*9)+p, result, objects=Objects)
		SetAttr("tas"& pad & (i3*9)+p&"_"&(range*100), result, objects=Objects)
	end()
//p
	set(_["objects.tas_mTotal"&i3+1]=objects.tas_mTotal)
end()
// i3
// Redundant code - Santosh 
//foreach(1..36, "t")
	//if(t<10) 
		//set(pad="0")
		//else()
		//set(pad="")
	//end()
	// t<19
	//Insert_At(table, _["objects.TAS"& pad & t], "TAS"&pad & t & "_" & (range*100), table.columncount)
//end()
// t
// M total is never used do not in output - Santosh Aug 1 2014
//foreach(1..3, "m")
	//Insert_At(table, _["objects.tas_mTotal"&m], "tas_mTotal"&m , table.columncount)
//end()	
// m
set(TAS_table=table)
	foreach(1.._TASmode.size-1, "m2")
		set(TASmode=_TASmode[m2])
		if(TASmode<10)	
			//set(_["WholeCells."&signal&"_TXT_"&stencilx&"_TAS_0"&TASmode&"_"&TNum]=_["TAS_table.TAS0"&TASmode&"_"&TNum])
			set(_["WholeCells."&signal&"_TXT_"&stencilx&"_TAS_0"&TASmode&"_"&TNum]=_["Objects.TAS0"&TASmode&"_"&TNum])
			else()
			if(TASmode<28)
				//set(_["WholeCells."&signal&"_TXT_"&stencilx&"_TAS_"&TASmode&"_"&TNum]=_["TAS_table.TAS"&TASmode&"_"&TNum])
				set(_["WholeCells."&signal&"_TXT_"&stencilx&"_TAS_"&TASmode&"_"&TNum]=_["Objects.TAS"&TASmode&"_"&TNum])
				else()
				//set(_["WholeCells."&signal&"_TXT_"&stencilx&"_TAS_"&TASmode]=_["TAS_table.TAS"&TASmode&"_"&TNum])
				set(_["WholeCells."&signal&"_TXT_"&stencilx&"_TAS_"&TASmode]=_["Objects.TAS"&TASmode&"_"&TNum])
				
			end()
		end()
		//if m2<10
	end()
	// foreach TAS#, ie m2

	//delete("TAS_table")
end()
// foreach TAS range value s
delete(s, m2, TNum, TRange, _TRange, _TASmode, TASmode, _TRangeMode)
end()
//Timer(continue=false)
//Set(RR=duration)
// if(IN_TAS==1)
end()
//foreach 1..3 e
end()
//foreach 1..nCh j
delete(adj_img,adj_mask0,adj_mask1,adj_mask2,appliedshift,i3,in_image,in_objects,kernel,m,m1,m2,m3,m4,m5,m6,m7,m8,m9,mask1,mask2,mask3,mask4,mask_all,non_numerics_count,p,pad,range,range_max,range_min,ratio_image,ratio_method,removeNAN,result,t,table,img_avg,image00,objects00)
end()
// if IN_textfeat=1

// 2.6.5 - CLEANUP
if(IN_cleanup==1)
delete(e,stencilx)
delete(WholeCells_1,WholeCells_2,WholeCells_3)
end()
// cleanup
//////////////////////////////////////////////////////////////////////////////////////////////////////////////////////////////////////////////////////////////////////////
// 2.7 - SIGNAL COLOCALIZATION MEASUREMENTS
if(IN_Pearsons==1 OR IN_Manders==1 OR IN_ICQ==1)
/////////////////////////////////////
// 2.7.1 - TWO SIGNAL ANALYSIS	
// Rollingball background correction: Created by Tony Collins, MBF, 25 Sept 2006; adapted from MBF_BG_Correction.proc by Jarkko Ylanko, MBF, 14 December 2010
foreach(1..nCh, "cc0")
	set(im_cur=_["IM_"&cc0])
	set(resizefactor=4)
	set(ballradius=15)
	resize(1/resizefactor, image=im_cur, yfactor=1/resizefactor)
	eros(edge=ballradius)
	resize(resizefactor, image=image, yfactor=resizefactor)
	set(backval = image.mean)
	set(xslip = (im_cur.width - image.width)/2)
	set(yslip = (im_cur.height - image.height)/2)
	redimension(im_cur.width, im_cur.height, xslip, yslip, backval, image=image, BackgroundMethod="mirror")
	set(BGimage = image)
	minus(im_cur, BGimage, neg_method="zero")
	set(BGCimage=result)
	set(_["IM_"&cc0&"bgc"]=BGCimage)
end()
// cc0
delete(cc0, im_cur, resizefactor, ballradius, backval, xslip, yslip, BGimage, BGCimage, result)

foreach(1..nCh, "cc1")
foreach(1..nCh, "cc2")
if(cc1!=cc2 AND cc2>cc1)
set(Ch1=_["IM_"&cc1&"bgc"])
set(Ch2=_["IM_"&cc2&"bgc"])
if(IN_Pearsons==1)
// Pearsons Coefficient: created by Tony Collins, MBF, 25 Sept 2006; adapted from MBF_ColocalisationCoefficients b03.proc lines #1-128 by Jarkko Ylanko, MBF, 14 December 2010
	set(ROI_obj=WholeCells)
	CalcIntensity(Image=Ch1, objects=ROI_obj, CalcStdDev=yes)
	rename(ROI_obj = objects)
	blank(Ch1.width, Ch1.height)
	convelems(image, sign = "signed")
	carryobjects(ROI_obj.body, ROI_obj.intensity, image=result)
	rename(Ch1m = image)
	minus(Ch1, Ch1m, result_type="long, signed")
	rename(Ch1subCh1m = result)
	CalcIntensity(Image=Ch2, objects=ROI_obj, CalcStdDev=yes)
	rename(Ch2_obj = objects)
	blank(Ch1.width, Ch1.height)
	convelems(image, sign = "signed")
	carryobjects(ROI_obj.body, Ch2_obj.intensity, image=result)
	rename(Ch2m = image)
	minus(Ch2, Ch2m, result_type = "long, signed")
	rename(Ch2subCh2m = result)
	mul(Ch2subCh2m, Ch1subCh1m, result_type = "long, signed")
	rename(PDM = result)
	blank(Ch1.width, Ch1.height)
	convelems(image, "floating", sign="unsigned")
	minus(PDM, 0, neg_method = "zero", result_type="float")
	set(PDM_pos_image = result)
	calcIntensity(Image = result, objects = ROI_obj, Total=yes)
	carryObjects(ROI_obj.body, objects.intensity, image = result)
	set(positive_PDM=image)
	mul(PDM, -1, result_type = "long")
	set(PDM_neg_image = result)
	minus(result, 0, neg_method = "zero", result_type="float")
	calcIntensity(Image = result, objects = ROI_obj, Total=yes)
	carryObjects(ROI_obj.body, objects.intensity, image = result)
	set(negative_PDM=image)
	minus(positive_PDM, negative_PDM, result_type = "float, signed")
	set(Pnumerator=result)
	mul(Ch1subCh1m, Ch1subCh1m, result_type = "float, signed")
	rename(Ch1subCh1mSqrd = result)
	calcIntensity(body, Ch1subCh1mSqrd,objects = ROI_obj, total=yes)
	rename( Ch1subCh1mSqrd_obj =objects)
	mul(Ch2subCh2m, Ch2subCh2m, result_type = "float, signed")
	rename(Ch2subCh2mSqrd = result)
	calcIntensity(body, Ch2subCh2mSqrd,objects = ROI_obj, total=yes)
	rename( Ch2subCh2mSqrd_obj =objects)
	blank(Ch1.width, Ch1.height)
	convelems(image, "floating", sign="signed")
	carryObjects(ROI_obj.body, Ch1subCh1mSqrd_obj.intensity, image = result)
	rename(sumCh1subCh1mSqrd = image)
	blank(Ch1.width, Ch1.height)
	convelems(image, "floating", sign= "signed")
	carryObjects(ROI_obj.body, Ch2subCh2mSqrd_obj.intensity, image = result)
	rename(sumCh2subCh2mSqrd = image)
	mul(sumCh2subCh2mSqrd, sumCh1subCh1mSqrd, result_type = "float, signed")
	CompAny("sqrt(result)") 
	rename(Pdenominator = result)
	div(Pnumerator, Pdenominator, result_type="float")
	rename(Pearsons =result)
	calcIntensity(body,Pearsons, objects = ROI_obj)
	renameattr(PearsonsR=intensity, objects=objects)
	delete(appliedshift,Ch1m,Ch1subCh1m,Ch1subCh1mSqrd,Ch1subCh1mSqrd_obj,Ch2m,Ch2subCh2m,Ch2subCh2mSqrd,Ch2subCh2mSqrd_obj,Ch2_obj,negative_PDM,non_numerics_count,Pdenominator,PDM,PDM_neg_image,PDM_pos_image,Pearsons,Pnumerator,positive_PDM,ROI_obj,sumCh1subCh1mSqrd,sumCh2subCh2mSqrd)
	set(_["WholeCells.Ch"&cc1&"_CLC_Ch"&cc2&"_PearsonsR"]=objects.PearsonsR)
	end()
	// IN_Pearsons==1
if(IN_Manders==1)
	// Mander's Coefficients: created by Tony Collins, MBF, 25 Sept 2006; adapted from MBF_ColocalisationCoefficients b03.proc lines #206-325 by Jarkko Ylanko, MBF, 14 December 2010
	set(ROI_obj=WholeCells)
	calcIntensity(body,Ch1, objects = ROI_obj, total=yes)
	rename(Ch1sum_obj = objects)
	calcIntensity(body,Ch2, objects = ROI_obj, total=yes)
	rename(Ch2sum_obj = objects)
	blank(Ch1.width, Ch1.height)
	convelems(image, "floating", sign="signed")
	carryObjects(ROI_obj.body, Ch1sum_obj.intensity, image = result)
	rename(Ch1sum=image)
	blank(Ch1.width, Ch1.height)
	convelems(image, "floating", sign="signed")
	carryObjects(ROI_obj.body, Ch2sum_obj.intensity, image = result)
	rename(Ch2sum=image)
	set(maskthresh=1)
	mask(image=Ch1, threshold=maskThresh, userealvalues=yes)
	rename(Ch1mask=mask)
	mask(image=Ch2, threshold=maskThresh, userealvalues=yes)
	rename(Ch2mask=mask)
	mul(Ch1, Ch2mask)
	rename(Ch1coloc = result)
	mul(Ch2, Ch1mask)
	rename(Ch2coloc = result)
	calcIntensity(body,Ch1coloc, objects = ROI_obj, total=yes)
	rename(Ch1coloc_obj = objects)
	calcIntensity(body,Ch2coloc, objects = ROI_obj, total=yes)
	rename(Ch2coloc_obj = objects)
	blank(Ch1.width, Ch1.height)
	convelems(image, "floating", sign="signed")
	carryObjects(ROI_obj.body,Ch1coloc_obj.intensity, image = result)
	rename(Ch1colocsum=image)
	blank(Ch1.width, Ch1.height)
	convelems(image, "floating", sign="signed")
	carryObjects(ROI_obj.body, Ch2coloc_obj.intensity, image = result)
	rename(Ch2colocsum=image)
	div(Ch1colocsum, Ch1sum, result_type="float")
	rename(M1=result)
	calcIntensity(body, M1, objects = ROI_obj)
	rename(M1_obj=objects)
	div(Ch2colocsum, Ch2sum, result_type="float")
	rename(M2=result)
	calcIntensity(body,M2, objects = ROI_obj)
	rename(M2_obj=objects)
	mul(Ch1, Ch2)
	rename(Ch1Ch2=result)
	calcIntensity(body, Ch1Ch2, objects=ROI_obj, Total=yes)
	rename(Ch1Ch2_obj=objects)
	blank(Ch1.width, Ch1.height)
	convelems(image, "floating", sign="signed")
	carryObjects(ROI_obj.body,Ch1Ch2_obj.intensity, image = result)
	rename(Rnumerator=image)
	mul(Ch1,Ch1)
	rename(Ch1sqrd=result)
	calcIntensity(body, Ch1sqrd, objects=ROI_obj, Total=yes)
	rename(Ch1sqrd_obj=objects)
	blank(Ch1.width, Ch1.height)
	convelems(image, "floating", sign="signed")
	carryObjects(ROI_obj.body,Ch1sqrd_obj.intensity, image = result)
	rename(Ch1sqrdsum=image)
	mul(Ch2,Ch2)
	rename(Ch2sqrd=result)
	calcIntensity(body, Ch2sqrd, objects=ROI_obj, Total=yes)
	rename(Ch2sqrd_obj=objects)
	blank(Ch1.width, Ch1.height)
	convelems(image, "floating", sign="signed")
	carryObjects(ROI_obj.body,Ch2sqrd_obj.intensity, image = result)
	rename(Ch2sqrdsum=image)
	mul(Ch2sqrdsum,Ch1sqrdsum, result_type = "float, signed")
	CompAny("sqrt(result)") 
	rename(Rdenominator = result)
	div(Rnumerator, Rdenominator,result_type="float")
	rename(MandersR =result)
	calcIntensity(body,MandersR, objects = ROI_obj)
	rename(MandersR_obj = objects)
	setAttr("M1", M1_obj.intensity, objects=ROI_obj)
	setAttr("M2", M2_obj.intensity, objects=objects)
	setAttr("MandersR", MandersR_obj.intensity, objects=objects)
	delete(appliedshift,Ch1Ch2,Ch1Ch2_obj,Ch1coloc,Ch1colocsum,Ch1coloc_obj,Ch1mask,Ch1sqrd,Ch1sqrdsum,Ch1sqrd_obj,Ch1sum,Ch1sum_obj,Ch2coloc,Ch2colocsum,Ch2coloc_obj,Ch2mask,Ch2sqrd,Ch2sqrdsum,Ch2sqrd_obj,Ch2sum,Ch2sum_obj,M1,M1_obj,M2,M2_obj,MandersR,MandersR_obj,maskthresh,non_numerics_count,Rdenominator,Rnumerator,ROI_obj)
	set(_["WholeCells.Ch"&cc1&"_CLC_Ch"&cc2&"_MandersR"]=objects.MandersR)
	set(_["WholeCells.Ch"&cc1&"_CLC_Ch"&cc2&"_M1"]=objects.M1)
	set(_["WholeCells.Ch"&cc1&"_CLC_Ch"&cc2&"_M2"]=objects.M2)
end()
// IN_Manders==1
if(IN_ICQ==1)
//131-203
// Quantitative Immunocolocalization (ICQ): created by Tony Collins, MBF, 25 Sept 2006; adapted from MBF_ColocalisationCoefficients b03.proc lines #131-203 by Jarkko Ylanko, MBF, 15 December 2010
	set(ROI_obj=WholeCells)
	CalcIntensity(Image=Ch1, objects=ROI_obj, CalcStdDev=no)
	rename(ROI_obj = objects)
	blank(Ch1.width, Ch1.height)
	convert(4,image=image)
	convelems(image, sign = "signed")
	carryobjects(ROI_obj.body, ROI_obj.intensity, image=result)
	rename(Ch1m = image)
	minus(Ch1, Ch1m, result_type="long, signed")
	rename(Ch1subCh1m = result)
	CalcIntensity(Image=Ch2, objects=ROI_obj, CalcStdDev=no)
	rename(Ch2_obj = objects)
	blank(Ch1.width, Ch1.height)
	convelems(image, "floating", sign = "signed")
	carryobjects(ROI_obj.body, Ch2_obj.intensity, image=result)
	rename(Ch2m = image)
	minus(Ch2, Ch2m, result_type = "long, signed")
	rename(Ch2subCh2m = result)
	mul(Ch2subCh2m, Ch1subCh1m, result_type = "long, signed")
	rename(PDM = result)
	minus( PDM, 0, result_type="automatic", neg_method="zero")
	rename(positive_images = result)
	mask(0.5, image=positive_images, userealvalues=yes)
	rename(positivePixels= mask)
	calcIntensity(body, positivePixels, objects=ROI_obj, Total=yes)
	rename(positive_obj = objects)
	blank(Ch1.width, Ch1.height)
	convelems(image, sign = "signed")
	carryObjects(ROI_obj.body, positive_obj.intensity, image = result)
	rename(ICQnumerator = image)
	blank(Ch1.width, Ch1.height)
	convelems(image, sign = "signed")
	calcAttr("area", objects=ROI_obj)
	carryObjects(ROI_obj.body, objects.area, image = result)
	rename(ICQdenominator = image)
	div(ICQnumerator, ICQdenominator, result_type="float")
	rename(ICQ = result)
	calcIntensity(body, ICQ, objects = ROI_obj)
	renameattr(ICQ=intensity, objects=objects)
	set(_["WholeCells.Ch"&cc1&"_CLC_Ch"&cc2&"_ICQ"]=objects.ICQ)
	delete(appliedshift,Ch2m,Ch2subCh2m,Ch2_obj,foreach_index,ICQ,ICQdenominator,ICQnumerator,non_numerics_count,PDM,positivePixels,positive_images,positive_obj,ROI_obj,Ch1m,Ch1subCh1m)
end()
// IN_ICQ==1
delete(Ch1,Ch2)
end()
// cc1!=cc2 AND cc2>cc1
end()
// cc2
end()
// cc1
foreach(1..nCh, "cc0")
delete(_["IM_"&cc0&"bgc"])
end()
// cc0
delete(cc0,cc1,cc2)
/////////////////////////////////////
end()
// if IN_Pearsons==1 OR IN_Manders==1 OR IN_ICQ==1
//////////////////////////////////////////////////////////////////////////////////////////////////////////////////////////////////////////////////////////////////////////
// 2.8 - DATA ACCUMULATION
if(defined("all_cells"))
	addobjects(wholecells, CheckOverlap=no, DeleteGeometry=yes, objects=all_cells)
	set(All_Cells=objects)
	else()
	set(All_Cells=wholecells)
end()
// if defined all_cells
end()
//if objects.count>0
end()
// IN_adjust
end()
// start..endfield
//////////////////////////////////////////////////////////////////////////////////////////////////////////////////////////////////////////////////////////////////////////
// 3. DATA OUTPUT
//////////////////////////////////////////////////////////////////////////////////////////////////////////////////////////////////////////////////////////////////////////
// 3.1 - OUTPUT IF NO ANALYSIS PERFORMED
if(defined("all_count"))
	output(all_count.count, "Preliminary object count")
end()
// 3.2 - OUTPUT IF ANALYSIS PERFORMED
if(defined("all_cells"))
if(defined("all_cells.NumberOfNuclei"))
DeleteAttr(NumberOfNuclei, objects=all_cells)
set(all_cells=objects)
end()
//numberofnuclei
//CreateScalarAttrTable(all_cells)
CreateAttrTableWithStat(Objects=all_cells)
Set(ScaAttr =AttrTable )
If(OP_stat=="mean")
TableFilter(rowindex==0, table=AttrTable)	
Else()
TableFilter(rowindex==1, table=AttrTable)
End()
Delete(table.ObjectNo,ScaAttr)
set(tablestat=table)
CreateScalarAttrTable(all_cells)
// Commented by Santosh Aug 1 2014 - Used 
//create("table")
//foreach(0..AttrTable.@columncount-1,"sop")
//insert_at(table, _["AttrTable."&AttrTable.@columns[sop]&"."&OP_stat], AttrTable.@columns[sop],table.@columncount)
//end()
//Foreach sop
//delete(sop)

set(table=attrtable)
insert_At(table, filledvec(table.@rowcount, __date__), "DateOfAnalysis", 3)
insert_At(table, table.aaFieldofView, "FieldofView", 0)
insert_At(table, table.aaXcoord, "Xcoord", 1)
insert_At(table, table.aaYcoord, "Ycoord", 2)
delete(table.aaFieldofView,table.aaXcoord,table.aaYcoord)
set(attrtable=table)
	set(table=tablestat)
	insert_At(table, All_Cells.@count, "ObjectCount", 3)
	insert_At(table, __date__, "DateOfAnalysis", 3)
	insert_At(table, attrtable.FieldofView.max, "FieldofView", 0)
	insert_At(table, "na", "Xcoord", 1)
	insert_At(table, "na", "Ycoord", 2)
	delete(table.aaFieldofView,table.aaXcoord,table.aaYcoord)
	set(tablestat=table)

// 3.2.1 - INCLUSION OF PLATE INFORMATION
if(defined("platemap_tab"))
	set(table_1=platemap_tab)
	set(table_2=attrTable)
	set(table_3=tablestat)
	if(table_1.@columncount==0)
		set(table=table_2)
		return()
	end()
	// empty table
foreach(2..3, "op")
if(op==3)
set(table_1=platemap_tab)
end()
//op==3
set(tabletemp=_["table_"&op])
	//if(table_1.@rowcount<tabletemp.@rowcount)
		create("table")
		//set(table_1_new=table)
		Set(table_1_new = tabletemp)
		foreach(table_1.@columncount-1..0, "tf")
			set(newVecName = table_1.columns[tf])
			set(newVec  =_["table_1."&newVecName])
			set(newFilledVec = filledvec(tabletemp.@rowcount, newvec[0]))
			Insert_At(table_1_new, newfilledvec, newVecName, 0)
			set(table_1_new=table)
		end()
		// tf
		set(table_1=table_1_new)
	//end()
	// row count check
	//foreach(0..tabletemp.@columncount-1, "ts")
		//set(newVecName = tabletemp.columns[ts])
		//set(newVec  =_["tabletemp."&newVecName])
		//Insert_At(table_1, newvec, newVecName, table_1.@columncount)
		//set(table_1=table)
	//end()
	// ts
	if(op==2)
	set(OPtable=table)
	else()
	set(tablestat=table)
	end()
	//if op==2
end()
//op
	delete(tf, ts, table_1, table_2, table_3, tabletemp, newVecName, newVec, newFilledVec, table_1_new, op)
	else() // ie no platemap
	set(wellindex=1*wellindex)
	set(table.aaWellIndex=filledvec(attrTable.rowcount, wellindex))
	if(op==2)
	set(OPtable=table)
	else()
	set(tablestat=table)
	end()
	// op==2
end()
// if defined platemap_tab

// 3.2.2 - WRITE TO FILE DATA OUTPUT
if(IN_gallery==1 OR IN_adjust==1)
set(OP_data=0)
end()
// pre-empt output of non-image data
if(OP_data==1)
	if(OP_treat==1)
		if(OP_treatID!=Wellindex)
			set(_OPtreatID=_["OPtable."&OP_treatID])
			set(_OPtreatID=_OPtreatID[0])
			else()
			set(_OPtreatID=wellindex)
		end()
		// if OP_treatID defined
		set(fileOut=dir2&"\\_"&_OPtreatID&"_output.txt")
		else()
		set(fileOut=dir2&"\\_output.txt")
	end()
	// save by OP_treat = 1
	set(filename=fileOut)
	set(wellfilename=dir2&"\\_Well"&OP_stat&"s.txt")
	set(h1="")
	set(h2="")
	set(keys=OPtable.columns)
	set(keys2=tablestat.columns)
////// for object level
	eval(readfile(filename))
	if(warningcode==2050)
		foreach(keys, "k") 
			typeinfo(OPtable[k])
			if(typeinfo.elemclass == "memblock")
				delete(OPtable[k])
				else()
				set(h1=h1 & unquote|text(k,"name") & "\t")
			end()
			// if memblock
		end()
		// foreach k
			set(h1 = h1 & "\n")
	end()
	// warningcode=2050
	write(OPtable, "<h1", "ascii", append=yes)
	write(h1,filename,"ascii", append=yes)
///// for well level
	eval(readfile(wellfilename))
	if(warningcode==2050)
		foreach(keys2, "k2") 
			typeinfo(tablestat[k2])
			if(typeinfo.elemclass == "memblock")
				delete(tablestat[k2])
				else()
				set(h2=h2 & unquote|text(k2,"name") & "\t")
			end()
			// if memblock
		end()
		// foreach k2
			set(h2 = h2 & "\n")
	end()
	// warningcode=2050	
	write(tablestat, "<h2", "ascii", append=yes)
	write(h2,wellfilename,"ascii", append=yes)
delete(h1, h2, k, k2, keys, keys2)
end()
//if OP_data = yes
// 3.2.3 - PLAYER WINDOW DATA OUTPUT
//if(IN_fx==1)
//set(OPtable=table) /////////////////////////////////////////////////////////////////////////////// STOPPED HERE JULY 17
set(stat=OP_stat)
foreach(1..OPtable.@columncount-1, "s")
if(s==15)
	if(IN_fov==0)
		output(fov, "Number of fields selected")
		output(fov-fieldcount, "Number of fields skipped")
		else()
		output(1, "Number of fields selected")
	end()
	// IN_fov
	output(OPtable.@rowcount,"Object count")
	end()
	//s=15
	if(s<11 OR s>13)
	set(elem=_["OPtable." & OPtable.@columns[s] & ".elemtype"])
	if(elem==13)	
		set(value = OPtable.[s][0])
		output(value,OPtable.@columns[s])
		else()
		output(_["OPtable."& OPtable.@columns[s]&"."& stat],OPtable.@columns[s])	
	end()
	// elem=13
	end()
	// ignore X, Y, fov
end()
// s
delete(OP_stat, value, elem, s)	
//end()
//// IN_fx==1
set(All_Data=table)	
end()
// if defined all_cells
// 3.2.4 - FIELD INFORMATION

//////////////////////////////////////////////////////////////////////////////////////////////////////////////////////////////////////////////////////////////////////////
// 4. EXPLORER CLEANUP
//////////////////////////////////////////////////////////////////////////////////////////////////////////////////////////////////////////////////////////////////////////
if(IN_cleanup==1)
if(IN_gallery==1)
delete(coordinatetable, cropimage, d, dir3, dir4, dirIM, appliedshift, errorcode, errors, errors_xml, fieldimage, filter, imagecount, non_numerics_count, oc, OP_Field, result, warningcode, X, Y)
end()
//in_gallery==1
	//set(_["Field_"&i&"_Nuclei"]=Nuclei)
	//set(_["Field_"&i&"_WholeCells"]=WholeCells)
	//set(_["Field_"&i&"_Ch1"]=IM_1)
	//if(defined("IM_2"))
	//	set(_["Field_"&i&"_Ch2"]=IM_2)
		delete(IM_2)
	//end()
	//// if defined IM_2
	//if(defined("IM_3"))
	//	set(_["Field_"&i&"_Ch3"]=IM_3)
		delete(IM_3)
	//end()
	//// if defined IM_3
	delete(Nuclei,WholeCells,IM_1)
	delete(AttrTable,platemap_tab,blue,green,red,image,objects,_signal,_stencil)
	delete(IN_Ch1,IN_ChDefault,IN_colocal,IN_fov,IN_ImageONOFF,IN_RGB,IN_adjust,IN_spots,IN_textfeat,_imageview,signal,TotalCellArea,StartField,EndField,quant,OP_data,OP_destination,foreach_index,fieldcount,exptFolder,distance_vector,dir2,dir,u,nCh,nImages,i,j,IN_Haralick,IN_HarStepNum,IN_ICQ,IN_intensity,IN_LSpotThresh,IN_Manders,IN_morph,IN_Pearsons,IN_RadMom,IN_TAS,IN_TASmode,IN_Zone,IN_ZoneCount,c)
	delete(cam, content, IN_cyto, IN_LSpotRound, IN_ROI, IN_NAN, IN_RefSEG, IN_RefTXT, IN_Stencil, IN_TRangeMode, nuc_ch)
	delete(IN_cleanup, fov, IN_cytoRef, IN_fx, IN_gallery, IN_RGBCh1, OP_FieldResult, OP_imagecount, row,column, table, date, ChEnd, ChStart)
	delete(ChannelSeries)
	delete(OP_treat, OP_treatID, _OPtreatID)
end()
// cleanup
end()
// skip!=1


//*************************************************************************
//  File Name:			objectfilter_WLE.proc
//  Product Version:	$Id: ObjectFilter_wle.proc 18310 2007-11-09 17:49:23Z ollikaon $						
//
//  Authors:			Olavi Ollikainen
//  e-mail: 			Olavi.Ollikainen@perkinelmer.com
//  Copyright:			(c) 2007 PerkinElmer Cellular Technologies
//
//  Purpose:  			Procedures for objectfilter WLE spell
//
//  Licences:			Translocation Bundle
//*************************************************************************

proc ObjectFilter_wle_Control_outputNames( container _ inout) [hidden]
{
	if(defined("HtmlViewSession"))
		
		if(defined("_spell.in.OutputObjectsName"))
			set(OutName_X=_spell.in.OutputObjectsName.value)
			if(OutName_X!="")
				eval("set(" & OutName_X & "=1)")
				if(errorcode>0)
					error("<fmterrs><b>Error in the input name <i>OutputObjectsName</i>. Spaces are not allowed. Correct the name and click to run. To return to the automatic naming mode enter an empty string.</fmterrs></b>")
				end()
				eval("delete(" & OutName_X & ")")
			end()
		end()
	end()
}

proc CreateAttrTableWithStat( 
	objectlist objects in "Input object list", 
	table AttrTable out "Table with scalar attributes", 
	vector AttrVectors out "Vector with vector attribute names", 
	vector AttrVectorsVector out) [hidden]
{
	comment(
	set(AttrNames=objects.keys)
	if(objects.count>0)
		foreach(AttrNames)
			eval("set(a1=1.0*objects." & i &")")
			if(a1.class=="vector" and a1.class!="intervalvector" and a1.class!="indexvector" and i!="ObjectNO" and a1.elemtype<8)
				eval("calcattr(" & i & ",iif(inf==" & i & " or " & i & "!=" & i & ",0," & i & "))")
			end()
		end()
	end()
	)
	create("table")
	
	if(objects.count>0)
		append(vec,0..objects.count-1)
		printfopen("<str")
		printf("ObjectNO\nstring\nmean\nmedian\nstddev\nmax\nmin\n")
		printfloop("%d\n",vec)
		printfopen()
		readtable(t,"<str")

		set(vec_start=t.ObjectNO)
		delete(t, str)
	else()
		push(vec_start, "mean", "median", "stddev", "max", "min")
	end()

	set(table.ObjectNO=vec_start)
	set(AttrVectors=vec(""))
	pop(AttrVectors,"")
	set(AttrVectorsVector=vec(""))
	pop(AttrVectorsVector,"")

	set(AttrNames=objects.keys)
	foreach(AttrNames)
		eval("set(a1=1.0*objects." & i &")")
		if(a1.class=="vector" and a1.class!="intervalvector" and a1.class!="indexvector" and i!="ObjectNO" and a1.elemtype<8)
			if(objects.count>0)
				set(a2=vec(a1.mean,a1.median,a1.stddev, a1.max, a1.min))
				append(a2,a1)
			else()
				//set(a2=vec(0,0,0,0,0))
				set(a2=vec(nan,nan,nan,nan,nan))
			end()
			
			eval("set(table." & i & "=a2)")	
			push(AttrVectors,i)
			push(AttrVectorsVector, a1)
		end()
	end()
	set(AttrTable=table)	
}


proc CreateAttrTableTech( 
	objectlist objects in "Input object list", 
	double HtmlViewFactor in,
	table AttrTableTech out "Table with scalar attributes"
	) [hidden]
{
	create("table")
	if(!defined("objects.ObjectsNo"))
		calcattr(ObjectNo, 1*cellindex)
	end()
	set(obj1=objects)
	fillobjects()
	width_length_upto100(objects)
	
	calcattr(xcoord, 1.0*HtmlViewFactor*center_spot.x[0],DefaultValue=0)
	calcattr(ycoord, 1.0*HtmlViewFactor*center_spot.y[0],DefaultValue=0)
	calcattr(radius, HtmlViewFactor*(full_Length/2+2*(Half_Width+1))/3)
	set(table.ObjectNo=objects.ObjectNo)
	set(table.X=objects.xcoord, table.Y=objects.ycoord, table.R=objects.radius)	

	set(objects=obj1)
	set(AttrNames=objects.keys)
	foreach(AttrNames)
		set(a1=objects[i])
		//if(a1.class=="vector" and a1.class!="intervalvector" and a1.class!="indexvector" and a1.elemtype<8 )
		if(a1.class=="vector" and a1.class!="intervalvector" and a1.class!="indexvector") 
			set(table[i]=a1)	
		end()
	end()
	set(AttrTableTech=table)	
}


proc CreateFilterSet( objectlist objects in "Input object list", container FilterSet out "Container with filter set data") [hidden]
{
	create("container")
	set(FilterSet=container)
	
	set(AttrNames=objects.keys)
	foreach(AttrNames)
		eval("set(a1=objects." & i &")")
		if(a1.class=="vector" and a1.class!="intervalvector" and a1.class!="indexvector" and i!="ObjectNO" and a1.elemtype<8)
			if(a1.length>0)
				set(a1min=a1.min, a1max=a1.max)
			else()
				set(a1min=0, a1max=0)
			end()
			set(a1minabs=0.00000001*abs(a1min), a1maxabs=0.00000001*abs(a1max))
			eval("set(FilterSet." & i & "=container)")
			eval("set(FilterSet." & i & ".ONOFF=FALSE)")
			eval("set(FilterSet." & i & ".MIN=a1min)")
			eval("set(FilterSet." & i & ".MAX=a1max)")	
			eval("set(FilterSet." & i & ".FMIN=a1min-a1minabs)")
			eval("set(FilterSet." & i & ".FMAX=a1max+a1maxabs)")			
		end()
	end()
}


proc CreateAttrTableWithFilt( 
	objectlist objects in "Input object list without class attributes",
	objectlist cl_class_attr in "Input object list with class attributes, attribute names should correspond to FilterSet container",
	container filterset in "Input container, which defines the filters", 
	table AttrTable out "Output tabel with scalar attributes and filter settings", 
	vector AttrVectors out "Vector with vector attribute names", 
	vector AttrVectorsVector out) [hidden]
{
	set(NumberOfObjects=objects.count)
	create("table")
	
	if(NumberOfObjects>0)
		append(vec,0..objects.count-1)
		printfopen("<str")
		printf("ObjectNO\nstring\nmean\nmedian\nstddev\nmax\nmin\nFilterONOFF\nFilterMIN\nFilterMAX\nObjectsBefore\nObjectsAfter\n")
		printfloop("%d\n",vec)
		printfopen()
		readtable(t,"<str")

		set(vec_start=t.ObjectNO)
		delete(t, str)
	else()
		push(vec_start, "mean", "median", "stddev", "max", "min", "FilterONOFF", "FilterMIN", "FilterMAX", "NumberOfObjectsBefore", "NumberOfObjectsAfter")
	end()

	set(table.ObjectNO=vec_start)

	set(AttrVectors=vec(""))
	pop(AttrVectors,"")
	set(AttrVectorsVector=vec(""))
	pop(AttrVectorsVector,"")

	set(AttrNames=objects.keys)
	foreach(AttrNames)
		eval("set(a1=1.0*objects." & i & ")")
		if(a1.class=="vector" and a1.class!="intervalvector" and a1.class!="indexvector" and i!="ObjectNO" and a1.elemtype<8)
			if(NumberOfObjects>0)	
				set(a2=vec(a1.mean,a1.median,a1.stddev, a1.max, a1.min))
			else()
				set(a2=vec(nan,nan,nan,nan,nan))
			end()
			
			eval("set(fs1=filterset." & i & ".ONOFF , fs2=filterset." & i & ".FMIN, fs3=filterset." & i & ".FMAX)")
			if(errorcode==0)
				if(fs1=="ON")	
					push(a2,1,fs2,fs3, NumberOfObjects)
					eval("set(fs4=cl_class_attr.filter_" & i & ".sum)")
					if(errorcode==0)
						push(a2,fs4)
					else()
						push(a2,NumberOfObjects)
					end()
				else() 
					push(a2,0, fs2, fs3, NumberOfObjects, NumberOfObjects)
				end()
			else() 
				push(a2,nan,nan,nan, NumberOfObjects , NumberOfObjects)
				
			end()
			
			if(NumberOfObjects>0)	
				append(a2,a1)
			end()
			eval("set(table." & i & "=a2)")	
			push(AttrVectors,i)
			push(AttrVectorsVector, a1)
		end()
	end()
	set(AttrTable=table)	
}


proc ObjectFilter_WLE_control(container _ inout) [hidden]
{
	if(!defined("Objects"))	
		set(errors="<fmterrs><b> Input <i>Objects</i> is missing. Evaluation is stopped. Select the input <i>Objects</i> and click to run.</b></fmterrs>")
		set(errorcode=6504007) 
		error()
	end()
	
	if( defined("HtmlViewSession"))
	
		set(lista=_spell.in)
		set(OutputName2=lista.objects.value)
		set(startpos=at(".", OutputName2,2))
		set(OutputObjectsName2=substr(lista.objects.value,startpos+1, OutputName2.length-startpos) & "_Filtered")

		if(!defined("OutputObjectsName"))
			set(list=_spell.in)
			set(cont_temp=cnt(value=OutputObjectsName2,type="scalar", title="Name of output object list. By default to input list name is added  suffix Filtered. If the input list is changed the name of output one is updated automatically during the first run. After the output name is changed manually the atomatic name update switches off. To return to the automatic mode enter empty string."))
			WizardInsertListElement("OutputObjectsName", "NumberOfDefinitions", cont_temp)
			set(_spell.in=list)
			set(_spell.my1=OutputObjectsName2, _spell.my2=OutputObjectsName2)
			delete(lista,list,OutputName2, startpos )
		else()
			if(OutputObjectsName!=OutputObjectsName2)
				
				if(OutputObjectsName==_spell.my2 or OutputObjectsName=="")
					set(list=_spell.in)
					set(_spell.in.OutputObjectsName.value=OutputObjectsName2)
					//WizardDeleteListElement("OutputObjectsName")
					//WizardPushVar("OutputObjectsName","scalar", OutputObjectsName2, title="Name of output object list. By default to input list name is added  suffix Filtered. If the input list is changed the name of output one is updated automatically during the first run. After the output name is changed manually the atomatic name update switches off. To return to the automatic mode enter empty string."))
					//set(_spell.in=list)
					set(_spell.my1=OutputObjectsName2, _spell.my2=OutputObjectsName2)
					set(OutputObjectsName=OutputObjectsName2)
					delete(list)
				else()
					set(_spell.my2=OutputObjectsName2)
					set(_spell.my1=OutputObjectsName)
					set(OutputObjectsName2=OutputObjectsName)
				end()
			end()
		else()
			set(OutputObjectsName2=OutputObjectsName)
		end()
	else()
		set(OutputObjectsName2=OutputObjectsName)
	end()
}


proc ObjectFilter_wle4( container _ inout ) [hidden]
{
	

	if( defined("HtmlViewSession"))
		set(list=_spell.in)
		set(_next=list.OutputObjectsName._next)
	
		while(_next!="_last")
			set(elem=list[_next])
			push(atest,_next)
			WizardDeleteListElement(_next)
			set(_next=elem._next)	
		end()
	end()
	set(ObjectsBeforeFilters=objects.count)
	CreateFilterSet(objects) // Creates a filterSet container for all numeric attributes in object list
	
	set(AttrNames=filterset.keys)
	set(text_title1=". ON-Filter is on; OFF- filter is off.")
	set(text_title2="Minimum limit. Default value is equal to the minimum attribute value.")//  i.e. all objects have attribute value higher than default one.")
	set(text_title3="Maximum limit. Default value is equal to the maximum attribute value.")//  i.e. all objects have attribute value smaller than default one.")
			


	foreach(AttrNames)
		if( defined("" & i)) // if filter is defined
			eval("set(minelem=filterset." & i & ".FMIN, maxelem=filterset." & i & ".FMAX)") 
			eval("set(ivalue=" & i & ", iminvalue=" & i & "_FMIN, imaxvalue=" & i & "_FMAX)")
			
			eval("set(filterset." & i & ".ONOFF=" & i &")")
			eval("set(filterset." & i & ".FMIN=" & iminvalue & ")")
			eval("set(filterset." & i & ".FMAX=" & imaxvalue & ")")
			set(text_title0="Filter, attribute " & i)
			
			if( defined("HtmlViewSession"))
				if(ivalue=="ON")
					WizardPushVar(i ,"scalar", vec("ON","OFF"), text_title0 & text_title1 )
				else()
					WizardPushVar(i ,"scalar", vec("OFF","ON"), text_title0 & text_title1 )
				end()
				WizardPushVar(i & "_FMIN","scalar",iminvalue, text_title2)
				WizardPushVar(i & "_FMAX","scalar",imaxvalue, text_title3)
			end()

		else()
			if(defined ("objects." & i ) )
				eval("set(a1=objects." & i & ")")
				if ( a1.class=="vector" and a1.class!="intervalvector")  
					set(text_title0="Filter, attribute " & i )
					if( defined("HtmlViewSession"))
						WizardPushVar(i,"scalar", vec("OFF","ON"), text_title0 & text_title1)
					end()
					eval("set(a1min=filterset." & i & ".FMIN)") 
					eval("set(a1max=filterset." & i & ".FMAX)") 

					set(i1=i & "_FMIN", i2=i & "_FMAX")
					if( defined("HtmlViewSession"))
						WizardPushVar(i1,"scalar", a1min, text_title2)
						WizardPushVar(i2,"scalar", a1max, text_title3)
					end()
				end()
			end()
		end()
	end()

	
	if(defined("VisualImage"))
		set(visualImage.factor=1.0)
		gamma(2.6, image=visualImage)
		carrypixels(image=image, mask=objects.border, data=image.max)
	else()
		blank(objects.body.image.width, objects.body.image.height)
		carrypixels(image=image, mask=objects.border, data=255)
	end()
	if( defined("HtmlViewSession"))
		
		set(_spell.in=list)
		if(Operation!="none")
			if(Operation=="DefaultsToMinMax")
				SetDefaultsToMinMax()
			else()
				if(Operation=="AllFiltersOFF")
					SetAllFiltersOFF()
				else()
					SetAllFiltersON()
				end()
			end()
			set(_spell.in.Operation.value="none")
		end()
		set(list=_spell.in)
	end()
	
	ApplyFilterSet2()
	
	CreateAttrTableWithFilt() //objects, cl_class_attr, 
	set(AttributeTableBeforeFilters=AttrTable)
	set(HtmlViewFactor=1.0)
	CreateAttrTableTech(cl_class_attr_text, HtmlViewFactor)
	CreateAttrTableWithStat() 
	set(AttributeTableAfterFilters=AttrTable)

	set(objects=cl_filtered)
	set(ObjectsAfterFilters=objects.count)
	if(objects.count>0)
		carryobjects(image=image, stencil=objects.border, shuffle=yes,data="rainbow")
	end()
	
	set(FilterImage_hidden=image)
	if(!defined("HtmlViewSession")) //Output illustration for dewizardized script
		if(!defined("ShowIllustrations"))
			set(ShowIllustrations=NO)
		end()
		if(!defined("SpellNameSuffixDewizard"))
			set(SpellNameSuffixDewizard="")
		end()
		if(ShowIllustrations)
			imageview(FilterImage_hidden,"ObjectFilter" & SpellNameSuffixDewizard,image=FilterImage_hidden, title="Object filters. White: discarded objects. Objects before: " & ObjectsBeforeFilters & ", after: " & ObjectsAfterFilters)
		end()
	end()
	//set(OutputName2=list.objects.value)
	//set(startpos=at(".", OutputName2,2))
	//set(OutputName=substr(list.objects.value,startpos+1, OutputName2.length-startpos))
	eval("set(" & OutputObjectsName2 & "=Objects)")
	
	
	//CreateAttrTableWithStat(objects)
	//set(FilterImage="<html> <body> <center> Objects after filters. With white are marked discarded objects <table border=1> <tr> <td> <img src=" & HTMLView_URL & "/image/png/_results." & _spell.name & ".FilterImage></table> </html>")  
	if( defined("HtmlViewSession"))
		set(_spell.in=list)	
		delete(list)	
	end()	
	delete(list)
}


proc ApplyFilterSet( objectlist objects inout "Input object list", container FilterSet in "Container with filter set data") [hidden]
{	
	set(AttrNames=filterset.keys)
	
	foreach(AttrNames)
		eval("set(a1=FilterSet." & i &")")
			
		if(a1.ONOFF)
			eval("cellfilter(a1.FMIN<= " & i  & " and "&  i & " <=a1.FMAX)")
		end()
	end()	
}

proc ApplyFilterSet2( objectlist objects in "Input object list", 
container FilterSet in "Container with filter set data",
objectlist cl_class_attr out "Object list with all objects and with calculated class attributes",
objectlist cl_class_attr_text out "Object list with all objects and with calculated class attributes in text form",
objectlist cl_filtered out "Object List of filtered objects"
) [hidden]
{	
	set(AttrNames=filterset.keys)

	set(cl_filtered=objects, cl_class_attr=objects, cl_class_attr_text=objects)
	foreach(AttrNames)
		eval("set(a1=FilterSet." & i & ")")
			
		if(a1.ONOFF)
			set(tx1="Filter_" & i)
			
			//eval("set(tx1=tx1 & i & ")")
			eval("calcattr(" & tx1 & ", a1.FMIN<=" & i  & " and " &  i & " <=a1.FMAX, objects=cl_class_attr)")
			
			set(cl_class_attr=objects)

			eval("calcattr(temporal,iif(" & tx1 & "==1, \"TRUE\",\"FALSE\"))")
			eval("setattr(" & tx1 & ",objects.temporal, objects=cl_class_attr_text)")
			set(cl_class_attr_text=objects)

			eval("cellfilter(a1.FMIN<= " & i  & " and " &  i & " <=a1.FMAX, objects=cl_filtered)")
			set(cl_filtered=objects)
		end()
	end()
	
}


proc SetDefaultsToMinMax( 
container _spell inout "Spell container",
container FilterSet inout "Input-output FilterSet container",
objectlist objects in "Object list with attributes"
) [hidden]
{	
	set(AttrNames=filterset.keys)
	if(objects.count>0)
		foreach(AttrNames)
			set(FilterSet[i]["FMIN"]=objects[i].min )	
			set(FilterSet[i]["FMAX"]=objects[i].max )	
			eval("set(_spell.in." & i & "_FMIN.value=FilterSet[i][\"FMIN\"])")
			eval("set(_spell.in." & i & "_FMAX.value=FilterSet[i][\"FMAX\"])")
			//set(_spell.in.[i & "_FMAX"]["value"]=FilterSet[i]["FMAX"])
		end()
	end()
	
}

proc SetAllFiltersOFF( 
container _spell inout "Spell container",
container FilterSet inout "Input-output FilterSet container",
objectlist objects in "Object list with attributes"
) [hidden]
{	
	set(AttrNames=filterset.keys)
	//if(objects.count>0)
		foreach(AttrNames)
			set(FilterSet[i]["ONOFF"]=0)
			eval("set(_spell.in." & i & ".value=\"OFF\")")
		end()
	//end()
	
}

proc SetAllFiltersON( 
container _spell inout "Spell container",
container FilterSet inout "Input-output FilterSet container",
objectlist objects in "Object list with attributes"
) [hidden]
{	
	set(AttrNames=filterset.keys)
	//if(objects.count>0)
		foreach(AttrNames)
			set(FilterSet[i]["ONOFF"]=1)
			//eval("set(_spell.in." & i & ".value=\"ON\")")
			set(_spell.in[i]["value"]="ON")	
			

		end()
	//end()
	
}


proc ObjectFilter_WLE_CreatePrivatINPHP (string privateinphp out) [hidden]
{
	set(privateinphp="""{
	
		$_inputs_struct_start=&$GLOBALS[$_spell]['inputs_struct_start'];
		$_inputs_struct_start_hidden=&$GLOBALS[$_spell]['inputs_struct_start_hidden'];
		echo "<table border=1 class=collapsed id=\"$_spell.inputs\" ";
		if($_ishidden) 	echo " style=\"display:none\" ";
		echo ">\n";
		if($_thisin != "_last") {
			echo "<tbody><tr><th colspan=10>INPUTS\n";
			while($_thisin != "_last"){
				if(isset($_inputs_struct_start[$_thisin])){
					echo "</tbody>";
					hiddenpar("$_spell.inputs_struct_start_hidden.$_thisin",$_inputs_struct_start_hidden[$_thisin]);

					echo "<tr><td nowrap valign=top colspan=10><table class=packer><tr><td><div class=dropdown onClick=\"showhiderec('$_spell.inpstruct.$_thisin','$_spell.inputs_struct_start_hidden.$_thisin')\"></div>\n";

					echo "<th align=left> &nbsp <i>$_inputs_struct_start[$_thisin]\n</i></table>";
					echo "<tbody id=$_spell.inpstruct.$_thisin";
					if($_inputs_struct_start_hidden[$_thisin]) echo " style=\"display:none\"";
					echo ">";
				}
				$_this=$_inputs[$_thisin];
				$_type="$_this[type]";
				$_value="$_this[value]";
				$_title="$_this[title]";
				showinputvar($_thisin,$_type,$_value,$_spell,$_title,$_this['vlist']);
				$_thisin=$_inputs[$_thisin]['_next'];
			}
			echo "</tbody>";
		} else {
			echo "<tr><td nowrap>no inputs for this spell\n";
		}
		
		$_comments=$GLOBALS[$_spell]['comments'];
		echo "<tr><th colspan=10> <br>Comments\n";
		echo "<tr><td align=center colspan=10> <textarea rows=10 name=\"$_spell.comments\">$_comments</textarea>";
		echo "</table>\n";
	
	}")
}

proc ObjectFilter_WLE_Create_inputs_struct_start(container SpellContainer inout) [hidden]
{
	set(epsilon=0.00001)
	create("container")
	set(SpellContainer2=SpellContainer)
	
	set(SpellContainer.inputs_struct_start=container)
	set(SpellContainer.inputs_struct_start_hidden=container)
	set(SpellContainer.inputs_struct_start.Objects="General")

	set(SpellContainer.inputs_struct_start_hidden.Objects=eval("SpellContainer2.inputs_struct_start_hidden.Objects",0))
	set(i2=0, i3=1)

	set(list=SpellContainer.in)
	if(defined("list.OutputObjectsName"))
		set(_next=list.OutputObjectsName._next)
		while(_next!="_last")
			if(3*floor(i2/3+epsilon)==i2)
				set(attributex=_next)
				//set(attributex2=substr(_next,1, _next.length-6))
				//set(SpellContainer.inputs_struct_start[_next]="Filter " & i3 & ", " & attributex)
				//set(SpellContainer.inputs_struct_start[_next]="Filter,   " & attributex)
				set(SpellContainer.inputs_struct_start[_next]=attributex & ", Filter " & i3)
				set(SpellContainer.inputs_struct_start_hidden[_next]=eval("""{SpellContainer2.inputs_struct_start_hidden[_next]}",1))
				set(i3=i3+1)
			end()
			set(elem=list[_next])
			set(_next=elem._next)
			set(i2=i2+1)	
		end()
	end()
}

proc ObjectFilter_WLE_MAIN(container _ inout) [hidden]
{
	ObjectFilter_wle_Control_outputNames() 
	ObjectFilter_WLE_control() 
	ObjectFilter_wle4()
	
	if(defined("HtmlViewSession") )
		
		ObjectFilter_wle_visual()
		
	
		ObjectFilter_WLE_CreatePrivatINPHP ()
		set(_spell.privateinphp=privateinphp)
		ObjectFilter_WLE_Create_inputs_struct_start(_spell)
		set(_spell=SpellContainer)
	end()
}


proc ObjectFilter_wle_html_code(container _ inout ) [hidden]
{
	if(zoom)
		set(HtMLImageWithZoom="""{
	
	<html> 
	<head>
	<style TYPE="text/css">
	
	div.button {
		background-color: #c0c0c0;
		font-family: Arial,Helvetica;
		cursor: pointer;
	}
	</style>
	</head>
	
	<body style="background-color:#ddd">
	<table>
	<tr>
	<td>
	<div class=button onClick="var elem=document.getElementById('__zoomHIDE'); if(elem.style.display=='none'){elem.style.display=''}else{elem.style.display='none'} ">
	&nbsp ShowHide &nbsp Zoom &nbsp</div></table>
	<table>
	<tr>
	<td align=center valign=top >
	
	<table id=__zoomHIDE>
	
	<td>
	<center><b>Zoomed image with object borders</b><br></center>
	<tr><td valign=center>
	}" & ZoomBox & " <tr><td valign=center> " & ZoomBox2 & """{
	<center><b>Zoomed Visual Image</b></center>
	
	</table>
	
	<td align=left valign=top >
	<table>
	<td>
	<left><b>Detected Nuclei</b><br></left>
	<left> }" & HintMap & Figuretext  & "</left></table></table>")

	else()
		set(HtMLImageWithZoom="""{
			
			<html> 

			<body style="background-color:#ddd">
			<table>
			<tr>
			<td>
			<table style="display:none">
			
			<td>
			<center><b>Zoomed image with object borders</b><br></center>
			<tr><td valign=center>
			}" & ZoomBox & " <tr><td valign=center> " & ZoomBox2 & """{
			<center><b>Zoomed Visual Image</b></center>
			
			</table>
			
			<td align=left valign=top >
			<table>
			<tr>
			<td>
			<left> }" & HintMap & """{
			<tr>
			<table>
			<tr>
			<td>
			<left>}" & Figuretext  & "</left></table></table></table>")
	end()
}


proc ObjectFilter_wle_html(container _ inout) [hidden]
{
	set(Htmlviewfactor=1)
	set(zoom=1)
	set(MainResultImageName="_results." & _spell.name & ".FilterImage_hidden")
	if(defined("VisualImage"))
		gamma(2.6,image=VisualImage)
		set(VisualImage_hidden=image)
		delete(image)
		set(MainResultImageName2="_results." & _spell.name & ".VisualImage_hidden")
	else()
		set(MainResultImageName2="_results." & _spell.name & ".FilterImage_hidden")
	end()
	
	CreateHintMap2Zooms_WLE(AttrTableTech,MainResultImageName,MainResultImageName,MainResultImageName2, zoom=zoom, width=HtmlviewFactor*FilterImage_hidden.width,bgcolor="#FFFFAA",zoomwfactor=3,zoomfactor=3, HTMLView_URL=HTMLView_URL,OrigImageWidth=FilterImage_hidden.width,OrigImageheight=FilterImage_hidden.height)
	if(!defined("VisualImage"))
		set(zoom=0)
	end()
}

proc ObjectFilter_wle_visual(container _ inout) [hidden]
{
	set(MaxObjectToTable=500)
	set(FigureText="<table><tr><td><b>Output objects</b><br>White: <i>discarded objects</i>. <br>Red, Yellow, Green, Blue, Violet: <i>classified objects</i>.<br>Number of objects before filters:<b> " & ObjectsBeforeFilters & "</b><br>Number of objects after filters:<b> " & ObjectsAfterFilters & "</b></table>")	
	ObjectFilter_wle_html()
	ObjectFilter_wle_html_code()
	set(FilterImage=HtMLImageWithZoom)
	
	//set(FilterImage="<html> <body style=\"background-color:#ddd\"> <img src=" & HTMLView_URL & "/image/png/_results." & _spell.name & ".FilterImage_hidden> " & text1 & "</html>")  
	delete(list)
	
	WizardPushVar("FilterImage","visual","", Title="With white are marked the discarded objects, with red, blue,green, yellow and violet ones which passed the filters")
	
	if(objects.count>MaxObjectToTable)
		tablefilter(objectno<MaxObjectToTable,table=AttributeTableBeforeFilters)
		set(AttributeTableBeforeFilters=table)
		tablefilter(objectno<MaxObjectToTable,table=AttributeTableAfterFilters)
		set(AttributeTableAfterFilters=table)
	end()
	WizardPushVar("AttributeTableBeforeFilters","table", title="Attributes before filters")
	WizardPushVar("AttributeTableAfterFilters","table", title="Attributes after filters")
	WizardPushVar(OutputObjectsName2,"objects","","Output objects.\nWhite: discarded objects. \nRed, Yellow, Green, Blue, Violet: classified objects.\nNumber of objects before filters: " & ObjectsBeforeFilters & "\nNumber of objects after filters: " & ObjectsAfterFilters)
			
	WizardPushVar("ObjectsBeforeFilters","scalar", Title="Number of Objects Before Filters")
	WizardPushVar("ObjectsAfterFilters","scalar", Title="Number of Objects After Filters")
			
	WizardPushVar("FilterImage_hidden","hidden", title="FilterImage")
				
	if(defined("VisualImage"))
		WizardPushVar("VisualImage_hidden","hidden", title="Visual image for html interface. Gamma is set to 2.6.")
		set(image=VisualImage)
	end()
	set(_spell.out=list)
}
