# Supplementary material for: Improving drug discovery using image-based multiparametric analysis of the epigenetic landscape
Source: eLife. 2019 Oct 22;8:e49683. doi: 10.7554/eLife.49683 (PMC6908434; doi:10.7554/eLife.49683)
Supplement: Supplementary file 1. [file elife-49683-supp1.xlsx]

## Sheet: Table S1
Table S1: Primary antibodies.
Antigen	Host	Dilution	Brand	Catalogue Number
H3K9me3	rb	1:500	Active Motif	39765
H3K4me1	ms	1:250	Active Motif	39635
H3K27me3	ms	1:250	Active Motif	61017
H3K27ac	rb	1:500	Active Motif	39133
H3K27ac	ms	1:250	Active Motif	39685
Sox2	ms	1:400	R&D Systems	MAB2018
Sox2	gt	1:250	R&D Systems	AF2018
Sall2	Rb	1:250	Bethyl	A303-208A
Brn2	gt	1:250	Santa Cruz	sc-6029
Olig2	rb	1:500	Millipore	AB9610
GFAP	rb	1:500	Millipore	AB5804
Oct4	rb	1:200	Cell Signaling	2840P

## Sheet: Table S2
Table S2: Epigenetic drug library - SBP.
Molecule Name	CAS Number	Functional Category
TAK-901	934541-31-8	Aurora
AMG-900	945595-80-2	Aurora
MLN8054	869363-13-3	Aurora
MK-5108 (VX-689)	1010085-13-8	Aurora
CCT137690	1095382-05-0	Aurora
Phthalazinone pyrazole	88048-62-7	Aurora
JNJ-7706621	443797-96-4	Aurora
Alisertib (MLN8237)	1028486-01-2	Aurora
ZM 447439	331771-20-1	Aurora
VX-680 (Tozasertib, MK-0457)	639089-54-6	Aurora
Danusertib (PHA-739358)	827318-97-8	Aurora
Barasertib (AZD1152-HQPA)	722544-51-6	Aurora
SNS-314 Mesylate	1146618-41-8	Aurora
CYC116	693228-63-6	Aurora
ENMD-2076	1291074-87-7	Aurora
Aurora A Inhibitor I	1158838-45-9	Aurora
PHA-680632	398493-79-3	Aurora
CCT129202	942947-93-5	Aurora
Hesperadin	422513-13-1	Aurora
GSK1324726A (I-BET726)	1300031-52-0	BET
I-BRD9	1714146-59-4	BET
(+/-)-JQ1	1268524-69-1	BET
PFI-1 (PF-6405761)	1403764-72-6	BET
I-BET151 (GSK1210151A)	1300031-49-5	BET
(+)-JQ1	1268524-70-4	BET
Bromosporine	1619994-69-2	BET
I-BET-762	1260907-17-2	BET
RVX-208	1044870-39-4	BET
OTX015	202590-98-5	BET
MS-436	1395084-25-9	BET
CPI-203	1446144-04-2	BET
OF-1	919973-83-4	BRPF
NI-57	1883548-89-7	BRPF
PFI-4	900305-37-5	BRPF
Gemcitabine	95058-81-4	DNMT
5-Aza-2'-deoxycytidine	2353-33-5	DNMT
Zebularine	654065	DNMT
Azacitidine	320-67-2	DNMT
Procainamide HCl	614-39-1	DNMT
2',3',5'-triacetyl-5-Azacytidine	10302-78-0	DNMT
RG108	48208-26-0	DNMT
SGI-1027	1020149-73-8	DNMT
5-Methylcytidine	2140-61-6	DNMT
5-Methyl-2'-deoxycytidine	838-07-3	DNMT
MG149	1243583-85-8	HAT
Anacardic acid	16611-84-0	HAT
CAY10669	1243583-88-1	HAT
Garcinol	78824-30-3	HAT
Butyrolactone 3	778649-18-6	HAT
CTPB	586976-24-1	HAT
I-CBP112 (hydrochloride)	1640282-31-0	HAT
SGC-CBP30	1613695-14-9	HAT
C646	328968-36-1	HAT
Remodelin	1622921-15-6	HAT
Tubastatin A HCl	1310693-92-5	HDAC6
Tubacin	537049-40-4	HDAC6
BRD73954	1440209-96-0	HDAC6
PCI-34051	950762-95-5	HDAC8
RGFP966	1396841-57-8	HDAC-Class I
Entinostat (MS-275)	209783-80-2	HDAC-Class I
Mocetinostat (MGCD0103)	726169-73-9	HDAC-Class I
RG2833 (RGFP109)	1215493-56-3	HDAC-Class I
Romidepsin (FK228, Depsipeptide)	128517-07-7	HDAC-Class I
CBHA	174664-65-4	HDAC-Class I
Pimelic Diphenylamide 106	937039-45-7	HDAC-Class I
Sodium Butyrate	156-54-7	HDAC-Pan
4SC-202	910462-43-0	HDAC-Pan
HPOB	1429651-50-2	HDAC-Pan
Valproic acid	99-66-1	HDAC-Pan
Phenylbutyrate·Na	1716-12-7	HDAC-Pan
NSC-3852	3565-26-2	HDAC-Pan
4-iodo-SAHA	1219807-87-0	HDAC-Pan
SAHA	149647-78-9	HDAC-Pan
M-344	251456-60-7	HDAC-Pan
AR-42	935881-37-1	HDAC-Pan
Scriptaid	287383-59-9	HDAC-Pan
PCI-24781 (Abexinostat)	783355-60-2	HDAC-Pan
LAQ824 (Dacinostat)	404951-53-7	HDAC-Pan
CI-994	112522-64-2	HDAC-Pan
Quisinostat (JNJ-26481585)	875320-29-9	HDAC-Pan
BML-210	537034-17-6	HDAC-Pan
Trichostatin A	58880-19-6	HDAC-Pan
CUDC-101	1012054-59-9	HDAC-Pan
MC1568	852475-26-4	HDAC-Pan
Pracinostat (SB939)	929016-96-6	HDAC-Pan
Givinostat (ITF2357)	732302-99-7	HDAC-Pan
Apicidin	183506-66-3	HDAC-Pan
Suberoyl bis-hydroxamic acid	38937-66-5	HDAC-Pan
Nullscript	300816-11-9	HDAC-Pan
HC Toxin	83209-65-8	HDAC-Pan
coumarin-SAHA	1260635-77-5	HDAC-Pan
SAHA-BPyne	930772-88-6	HDAC-Pan
Fluoro-SAHA	149648-08-8	HDAC-Pan
Sodium Phenylbutyrate	1716-12-7	HDAC-Pan
Valproic acid hydroxamate	106132-78-9	HDAC-Pan
MC-1293	117378-93-5	HDAC-Pan
Oxamflatin	151720-43-3	HDAC-Pan
HNHA	926908-04-5	HDAC-Pan
NCH-51	848354-66-5	HDAC-Pan
Pyroxamide	382180-17-8	HDAC-Pan
Belinostat (PXD101)	414864-00-9	HDAC-Pan
Panobinostat (LBH589)	404950-80-7	HDAC-Pan
CAY10398	193551-00-7	HDAC-Pan
Chidamide	743420-02-2	HDAC-Pan
2-hexyl-4-Pentynoic Acid	96017-59-3	HDAC-Pan
Resminostat	864814-88-0	HDAC-Pan (Class I + HDAC6)
CAY10683	1477949-42-0	HDAC-Pan (Class I + HDAC6)
BML-281	1045792-66-2	HDAC-Pan (Class I + HDAC6)
Droxinostat	99873-43-5	HDAC-Pan (Class I + HDAC6)
Rocilinostat (ACY-1215)	1316214-52-4	HDAC-Pan (Class I + HDAC6)
Nexturastat A	1403783-31-2	HDAC-Pan (Class I + HDAC6)
CUDC-907	1339928-25-4	HDAC-Pan (Class I + HDAC6)
CYT387	1056634-68-4	JAK
Tofacitinib (CP-690550,Tasocitinib)	540737-29-9	JAK
TG101209	936091-14-4	JAK
Baricitinib (LY3009104, INCB028050)	1187594-09-7	JAK
TG101348 (SAR302503)	936091-26-8	JAK
CEP-33779	1257704-57-6	JAK
Lestaurtinib	111358-88-4	JAK
AZD1480	935666-88-9	JAK
XL019	945755-56-6	JAK
ZM 39923 HCl	1021868-92-7	JAK
Pacritinib (SB1518)	937272-79-2	JAK
WHI-P154	211555-04-3	JAK
WP1066	857064-38-1	JAK
S-Ruxolitinib (INCB018424)	941678-49-5	JAK
AT9283	896466-04-9	JAK
Filgotinib (GLPG0634)	1206161-97-8	JAK
NVP-BSK805 2HCl	1092499-93-8 (free base)	JAK
LY2784544	1229236-86-5	JAK
AZ 960	905586-69-8	JAK
ML324	1222800-79-4	KDM-JMJC/D
Daminozide	1596-84-5	KDM-JMJC/D
GSK-J1 (sodium salt)	1373422-53-7	KDM-JMJC/D
GSK-J5 (hydrochloride)	1797983-32-4	KDM-JMJC/D
GSK J4 HCl	1797983-09-5	KDM-JMJC/D
N-Oxalylglycine	5262-39-5	KDM-JMJC/D
IOX1	5852-78-8	KDM-JMJC/D
JIB-04	199596-05-9	KDM-JMJC/D
ORY-1001 (RG-6016)	1431326-61-2	KDM-LSD1
SP2509	1423715-09-6	KDM-LSD1
OG-L002	1357302-64-7	KDM-LSD1
GSK-LSD1 (hydrochloride)	1431368-48-7	KDM-LSD1
IOX2	931398-72-0	KDM-Misc
Tranylcypromine hemisulfate	13492-01-8 (H2SO4)	KDM-Misc
2,4-Pyridinedicarboxylic Acid	499-80-9	KDM-Misc
2-Hydroxyglutaric Acid (sodium salt)	40951-21-1	KDM-Misc
EPZ5676	1380288-87-8	KMT-DotL1
EPZ004777	1338466-77-5	KMT-DotL1
SGC 0946	1561178-17-3	KMT-DotL1
EI1	1418308-27-6	KMT-EZH1/2
GSK503	1346572-63-1	KMT-EZH1/2
3-Deazaneplanocin A (DZNeP)	120964-45-6	KMT-EZH1/2
GSK343	1346704-33-3	KMT-EZH1/2
EPZ-6438	1403254-99-8	KMT-EZH1/2
UNC1999	1431612-23-5	KMT-EZH1/2
EPZ005687	1396772-26-1	KMT-EZH1/2
GSK 126	1346574-57-9	KMT-EZH1/2
CPI-360	1802175-06-9	KMT-EZH1/2
CPI-169	1450655-76-1	KMT-EZH1/2
UNC0638	1255580-76-7	KMT-G9a/GLP
BRD4770	1374601-40-7	KMT-G9a/GLP
UNC0321 (trifluoroacetate salt)	1238673-32-9	KMT-G9a/GLP
BIX-01294	935693-62-2	KMT-G9a/GLP
A-366	1527503-11-2	KMT-G9a/GLP
UNC0631	1320288-19-4	KMT-G9a/GLP
UNC0646	1320288-17-2	KMT-G9a/GLP
UNC0224	1197196-48-7	KMT-G9a/GLP
UNC0642	1481677-78-4	KMT-G9a/GLP
LLY-507	1793053-37-8	KMT-Misc
A-196	1982372-88-2	KMT-Misc
Chaetocin	28097-03-2	KMT-Misc
AZ 505	1035227-43-0	KMT-Misc
Sinefungin	58944-73-3	KMT-Misc
(R)-PFI-2 (hydrochloride)	1627607-87-7	KMT-Misc
UNC0379	1620401-82-2	KMT-Misc
UPF 1069	1048371-03-4	L3MBTL
UNC669	1314241-44-5	L3MBTL
UNC1215	1415800-43-9	L3MBTL
MI-3 (Menin-MLL Inhibitor)	1271738-59-0	MLL
MI-2 (hydrochloride)	1271738-62-5	MLL
MI-nc (hydrochloride)	1359873-45-2	MLL
WDR5-0103	890190-22-4	MLL
MM-102	1417329-24-8	MLL
Olaparib (AZD2281, Ku-0059436)	763113-22-0	PARP
Veliparib (ABT-888)	912444-00-9	PARP
Iniparib (BSI-201)	160003-66-7	PARP
Rucaparib (AG-014699,PF-01367338)	459868-92-9	PARP
AG-14361	328543-09-5	PARP
AZD2461	1174043-16-3	PARP
BMN 673	1207456-01-6	PARP
INO-1001 (3-Aminobenzamide)	3544-24-9	PARP
PJ34	344458-19-1	PARP
ME0328	1445251-22-8	PARP
SGI-1776 free base	1025065-69-3	PIM
SMI-4a	438190-29-5	PIM
AZD1208	1204144-28-4	PIM
CX-6258 HCl	1353859-00-3	PIM
MS023 hydrochloride	1831110-54-3	PRMT
SGC707	1687736-54-4	PRMT
MS049 hydrochloride	1502816-23-0	PRMT
AMI-1 (sodium salt)	20324-87-2	PRMT
Ellagic Acid	476-66-4	PRMT
Piceatannol	10083-24-6	SIRTa
Resveratrol	501-36-0	SIRTa
Triacetylresveratrol	42206-94-0	SIRTa
SRT1720	1001645-58-4	SIRTa
BML-278	120533-76-8	SIRTa
CAY10591	839699-72-8	SIRTa
Aminoresveratrol sulfate	1224713-76-1	SIRTa
B2	115687-05-3	SIRTi
Suramin·6Na	129-46-4	SIRTi
Nicotinamide	98-92-0	SIRTi
BML-266	96969-83-4	SIRTi
JGB1741	1256375-38-8	SIRTi
AGK2	304896-28-4	SIRTi
EX-527	49843-98-3	SIRTi
Salermide	1105698-15-4	SIRTi
Splitomicin	1384339	SIRTi
Sirtinol	410536-97-9	SIRTi
SIRT1/2 Inhibitor IV	14513-15-6	SIRTi
AK-7	420831-40-9	SIRTi

## Sheet: Table S3
Table S3: Epigenetic drug used for concentration curve
Molecule Name	CAS Number	Functional Category
TAK-901	934541-31-8	Aurora
MLN8054	869363-13-3	Aurora
MK-5108 (VX-689)	1010085-13-8	Aurora
Phthalazinone pyrazole	88048-62-7	Aurora
Alisertib (MLN8237)	1028486-01-2	Aurora
ZM 447439	331771-20-1	Aurora
VX-680 (Tozasertib, MK-0457)	639089-54-6	Aurora
Barasertib (AZD1152-HQPA)	722544-51-6	Aurora
SNS-314 Mesylate	1146618-41-8	Aurora
Aurora A Inhibitor I	1158838-45-9	Aurora
Hesperadin	422513-13-1	Aurora
Entinostat (MS-275)	209783-80-2	HDAC-Class I
Mocetinostat (MGCD0103)	726169-73-9	HDAC-Class I
Romidepsin (FK228, Depsipeptide)	128517-07-7	HDAC-Class I
RGFP966	1396841-57-8	HDAC-Class I
RG2833 (RGFP109)	1215493-56-3	HDAC-Class I
CBHA	174664-65-4	HDAC-Class I
Pimelic Diphenylamide 106	937039-45-7	HDAC-Class I
Valproic acid	99-66-1	HDAC-Pan
NSC-3852	3565-26-2	HDAC-Pan
Sodium Butyrate	156-54-7	HDAC-Pan
SAHA	149647-78-9	HDAC-Pan
HNHA	926908-04-5	HDAC-Pan
M-344	251456-60-7	HDAC-Pan
Scriptaid	287383-59-9	HDAC-Pan
CI-994	112522-64-2	HDAC-Pan
BML-210	537034-17-6	HDAC-Pan
Belinostat (PXD101)	414864-00-9	HDAC-Pan
Panobinostat (LBH589)	404950-80-7	HDAC-Pan
Trichostatin A	58880-19-6	HDAC-Pan
Apicidin	183506-66-3	HDAC-Pan
Suberoyl bis-hydroxamic acid	38937-66-5	HDAC-Pan
Nullscript	300816-11-9	HDAC-Pan
Fluoro-SAHA	149648-08-8	HDAC-Pan
Valproic acid hydroxamate	106132-78-9	HDAC-Pan
MC-1293	117378-93-5	HDAC-Pan
Oxamflatin	151720-43-3	HDAC-Pan
NCH-51	848354-66-5	HDAC-Pan
AR-42	935881-37-1	HDAC-Pan
PCI-24781 (Abexinostat)	783355-60-2	HDAC-Pan
LAQ824 (Dacinostat)	404951-53-7	HDAC-Pan
Quisinostat (JNJ-26481585)	875320-29-9	HDAC-Pan
CUDC-101	1012054-59-9	HDAC-Pan
MC1568	852475-26-4	HDAC-Pan
Pracinostat (SB939)	929016-96-6	HDAC-Pan
Sodium Phenylbutyrate	1716-12-7	HDAC-Pan
4-iodo-SAHA	1219807-87-0	HDAC-Pan
HC Toxin	83209-65-8	HDAC-Pan
coumarin-SAHA	1260635-77-5	HDAC-Pan
SAHA-BPyne	930772-88-6	HDAC-Pan
Pyroxamide	382180-17-8	HDAC-Pan
CAY10398	193551-00-7	HDAC-Pan
Chidamide	743420-02-2	HDAC-Pan
HPOB	1429651-50-2	HDAC-Pan
2-hexyl-4-Pentynoic Acid	96017-59-3	HDAC-Pan
4SC-202	910462-43-0	HDAC-Pan
Droxinostat	99873-43-5	HDAC-Pan (Class I + HDAC6)
BML-281	1045792-66-2	HDAC-Pan (Class I + HDAC6)
CUDC-907	1339928-25-4	HDAC-Pan (Class I + HDAC6)
Rocilinostat (ACY-1215)	1316214-52-4	HDAC-Pan (Class I + HDAC6)
Resminostat	864814-88-0	HDAC-Pan (Class I + HDAC6)
Nexturastat A	1403783-31-2	HDAC-Pan (Class I + HDAC6)
CAY10683	1477949-42-0	HDAC-Pan (Class I + HDAC6)
CYT387	1056634-68-4	JAK
Tofacitinib (CP-690550,Tasocitinib)	540737-29-9	JAK
TG101209	936091-14-4	JAK
TG101348 (SAR302503)	936091-26-8	JAK
CEP-33779	1257704-57-6	JAK
Lestaurtinib	111358-88-4	JAK
AZD1480	935666-88-9	JAK
XL019	945755-56-6	JAK
ZM 39923 HCl	1021868-92-7	JAK
Pacritinib (SB1518)	937272-79-2	JAK
WP1066	857064-38-1	JAK
AT9283	896466-04-9	JAK
NVP-BSK805 2HCl	1092499-93-8 (free base)	JAK
LY2784544	1229236-86-5	JAK
AZ 960	905586-69-8	JAK
EI1	1418308-27-6	KMT-EZH1/2
GSK343	1346704-33-3	KMT-EZH1/2
UNC1999	1431612-23-5	KMT-EZH1/2
GSK 126	1346574-57-9	KMT-EZH1/2
CPI-360	1802175-06-9	KMT-EZH1/2
CPI-169	1450655-76-1	KMT-EZH1/2
B2	115687-05-3	SIRTi
Suramin·6Na	129-46-4	SIRTi
BML-266	96969-83-4	SIRTi
Splitomicin	1384339	SIRTi
Sirtinol	410536-97-9	SIRTi
SIRT1/2 Inhibitor IV	14513-15-6	SIRTi
AK-7	420831-40-9	SIRTi

## Sheet: Table S4
Table S4: Epigenetic drug used for comparing activity across GBM lines
Molecule Name	CAS Number	Functional Category	Concentration (uM)
Tubastatin A HCl	1310693-92-5	HDAC6	10
Tubacin	537049-40-4	HDAC6	10
BRD73954	1440209-96-0	HDAC6	10
PCI-34051	950762-95-5	HDAC8	10
Entinostat (MS-275)	209783-80-2	HDAC-Class I	1
Mocetinostat (MGCD0103)	726169-73-9	HDAC-Class I	1
RGFP966	1396841-57-8	HDAC-Class I	3
RG2833 (RGFP109)	1215493-56-3	HDAC-Class I	1
CBHA	174664-65-4	HDAC-Class I	1
Pimelic Diphenylamide 106	937039-45-7	HDAC-Class I	1
Valproic acid	99-66-1	HDAC-Pan	10
NSC-3852	3565-26-2	HDAC-Pan	1
SAHA	149647-78-9	HDAC-Pan	1
Scriptaid	287383-59-9	HDAC-Pan	1
CI-994	112522-64-2	HDAC-Pan	3
BML-210	537034-17-6	HDAC-Pan	10
Trichostatin A	58880-19-6	HDAC-Pan	1
Suberoyl bis-hydroxamic acid	38937-66-5	HDAC-Pan	10
Nullscript	300816-11-9	HDAC-Pan	3
SAHA-BPyne	930772-88-6	HDAC-Pan	10
Pyroxamide	382180-17-8	HDAC-Pan	3
CAY10398	193551-00-7	HDAC-Pan	1
Chidamide	743420-02-2	HDAC-Pan	3
HPOB	1429651-50-2	HDAC-Pan	10
4SC-202	910462-43-0	HDAC-Pan	1
Droxinostat	99873-43-5	HDAC-Pan (Class I + HDAC6)	1
BML-281	1045792-66-2	HDAC-Pan (Class I + HDAC6)	1
Rocilinostat (ACY-1215)	1316214-52-4	HDAC-Pan (Class I + HDAC6)	1
Resminostat	864814-88-0	HDAC-Pan (Class I + HDAC6)	1
Nexturastat A	1403783-31-2	HDAC-Pan (Class I + HDAC6)	1
3-Deazaneplanocin A (DZNeP)	120964-45-6	KMT-EZH1/2	1
EPZ-6438	1403254-99-8	KMT-EZH1/2	1
GSK343	1346704-33-3	KMT-EZH1/2	1
UNC1999	1431612-23-5	KMT-EZH1/2	1
GSK 126	1346574-57-9	KMT-EZH1/2	1
CPI-360	1802175-06-9	KMT-EZH1/2	1
CPI-169	1450655-76-1	KMT-EZH1/2	1
EI1	1418308-27-6	KMT-EZH1/2	1
GSK503	1346572-63-1	KMT-EZH1/2	1
BIX-01294	935693-62-2	KMT-G9a/GLP	3
UNC0638	1255580-76-7	KMT-G9a/GLP	3
UNC0631	1320288-19-4	KMT-G9a/GLP	3
UNC0646	1320288-17-2	KMT-G9a/GLP	3
UNC0224	1197196-48-7	KMT-G9a/GLP	3
UNC0642	1481677-78-4	KMT-G9a/GLP	3
Sinefungin	58944-73-3	KMT-Misc	10
(R)-PFI-2 (hydrochloride)	1627607-87-7	KMT-Misc	10
UNC0379	1620401-82-2	KMT-Misc	1
AZ 505	1035227-43-0	KMT-Misc	10
LLY-507	1793053-37-8	KMT-Misc	1
B2	115687-05-3	SIRTi	1
Suramin·6Na	129-46-4	SIRTi	3
SIRT1/2 Inhibitor IV	14513-15-6	SIRTi	10
BML-266	96969-83-4	SIRTi	3
Sirtinol	410536-97-9	SIRTi	3
AK-7	420831-40-9	SIRTi	10

## Sheet: Table S5
Table S5: Epigenetic drug screened for sensitization to cytotoxic treatment
Molecule Name	CAS Number	Functional Category	Concentration (uM)
PHA-680632	398493-79-3	Aurora	0.1
MLN8054	869363-13-3	Aurora	0.1
Danusertib (PHA-739358)	827318-97-8	Aurora	0.1
SNS-314 Mesylate	1146618-41-8	Aurora	0.1
CCT129202	942947-93-5	Aurora	0.1
VX-680 (Tozasertib, MK-0457)	639089-54-6	Aurora	0.1
AMG-900	945595-80-2	Aurora	0.1
ENMD-2076	1291074-87-7	Aurora	0.1
Aurora A Inhibitor I	1158838-45-9	Aurora	0.1
Alisertib (MLN8237)	1028486-01-2	Aurora	0.1
TAK-901	934541-31-8	Aurora	0.1
Barasertib (AZD1152-HQPA)	722544-51-6	Aurora	0.1
JNJ-7706621	443797-96-4	Aurora	0.1
MK-5108 (VX-689)	1010085-13-8	Aurora	0.1
CYC116	693228-63-6	Aurora	0.1
Hesperadin	422513-13-1	Aurora	0.1
CCT137690	1095382-05-0	Aurora	1
ZM 447439	331771-20-1	Aurora	1
Phthalazinone pyrazole	88048-62-7	Aurora	3
OTX015	202590-98-5	BET	0.3
I-BET151 (GSK1210151A)	1300031-49-5	BET	0.3
(+)-JQ1	1268524-70-4	BET	0.3
GSK1324726A (I-BET726)	1300031-52-0	BET	0.3
CPI-203	1446144-04-2	BET	0.3
MS-436	1395084-25-9	BET	10
PFI-1 (PF-6405761)	1403764-72-6	BET	10
I-BET-762	1260907-17-2	BET	1
I-BRD9	1714146-59-4	BET	3
(+/-)-JQ1	1268524-69-1	BET	3
RVX-208	1044870-39-4	BET	10
Bromosporine	1619994-69-2	BET	3
PFI-4	900305-37-5	BRPF	10
NI-57	1883548-89-7	BRPF	10
OF-1	919973-83-4	BRPF	10
5-Aza-2'-deoxycytidine	2353-33-5	DNMT	0.3
5-Methyl-2'-deoxycytidine	838-07-3	DNMT	0.3
Gemcitabine	95058-81-4	DNMT	0.1
Zebularine	654065	DNMT	10
SGI-1027	1020149-73-8	DNMT	1
Azacitidine	320-67-2	DNMT	10
5-Methylcytidine	2140-61-6	DNMT	3
RG108	48208-26-0	DNMT	10
Procainamide HCl	614-39-1	DNMT	10
2',3',5'-triacetyl-5-Azacytidine	10302-78-0	DNMT	10
Remodelin	1622921-15-6	HAT	3
SGC-CBP30	1613695-14-9	HAT	10
MG149	1243583-85-8	HAT	10
Butyrolactone 3	778649-18-6	HAT	10
CAY10669	1243583-88-1	HAT	10
C646	328968-36-1	HAT	10
Anacardic acid	16611-84-0	HAT	10
I-CBP112 (hydrochloride)	1640282-31-0	HAT	10
CTPB	586976-24-1	HAT	10
Garcinol	78824-30-3	HAT	10
Tubastatin A HCl	1310693-92-5	HDAC6	1
BRD73954	1440209-96-0	HDAC6	3
Tubacin	537049-40-4	HDAC6	1
PCI-34051	950762-95-5	HDAC8	10
Mocetinostat (MGCD0103)	726169-73-9	HDAC-Class I	0.3
Romidepsin (FK228, Depsipeptide)	128517-07-7	HDAC-Class I	0.1
CBHA	174664-65-4	HDAC-Class I	0.3
Entinostat (MS-275)	209783-80-2	HDAC-Class I	0.3
RG2833 (RGFP109)	1215493-56-3	HDAC-Class I	3
RGFP966	1396841-57-8	HDAC-Class I	1
Pimelic Diphenylamide 106	937039-45-7	HDAC-Class I	3
coumarin-SAHA	1260635-77-5	HDAC-Pan	0.1
AR-42	935881-37-1	HDAC-Pan	0.1
Scriptaid	287383-59-9	HDAC-Pan	0.3
Chidamide	743420-02-2	HDAC-Pan	0.3
Panobinostat (LBH589)	404950-80-7	HDAC-Pan	0.1
SAHA	149647-78-9	HDAC-Pan	0.3
LAQ824 (Dacinostat)	404951-53-7	HDAC-Pan	0.1
CUDC-101	1012054-59-9	HDAC-Pan	0.1
CAY10398	193551-00-7	HDAC-Pan	0.3
4-iodo-SAHA	1219807-87-0	HDAC-Pan	0.1
Quisinostat (JNJ-26481585)	875320-29-9	HDAC-Pan	0.1
Pracinostat (SB939)	929016-96-6	HDAC-Pan	0.1
4SC-202	910462-43-0	HDAC-Pan	0.3
Oxamflatin	151720-43-3	HDAC-Pan	0.1
NSC-3852	3565-26-2	HDAC-Pan	0.1
PCI-24781 (Abexinostat)	783355-60-2	HDAC-Pan	0.1
Belinostat (PXD101)	414864-00-9	HDAC-Pan	0.1
Apicidin	183506-66-3	HDAC-Pan	0.1
Pyroxamide	382180-17-8	HDAC-Pan	0.3
M-344	251456-60-7	HDAC-Pan	0.1
Trichostatin A	58880-19-6	HDAC-Pan	0.1
Givinostat (ITF2357)	732302-99-7	HDAC-Pan	0.3
HC Toxin	83209-65-8	HDAC-Pan	0.1
Fluoro-SAHA	149648-08-8	HDAC-Pan	0.3
HPOB	1429651-50-2	HDAC-Pan	10
Sodium Phenylbutyrate	1716-12-7	HDAC-Pan	10
Suberoyl bis-hydroxamic acid	38937-66-5	HDAC-Pan	3
Nullscript	300816-11-9	HDAC-Pan	1
NCH-51	848354-66-5	HDAC-Pan	3
Valproic acid	99-66-1	HDAC-Pan	3
Phenylbutyrate·Na	1716-12-7	HDAC-Pan	10
MC1568	852475-26-4	HDAC-Pan	10
BML-210	537034-17-6	HDAC-Pan	3
HNHA	926908-04-5	HDAC-Pan	10
Sodium Butyrate	156-54-7	HDAC-Pan	10
2-hexyl-4-Pentynoic Acid	96017-59-3	HDAC-Pan	10
SAHA-BPyne	930772-88-6	HDAC-Pan	3
CI-994	112522-64-2	HDAC-Pan	1
Valproic acid hydroxamate	106132-78-9	HDAC-Pan	10
MC-1293	117378-93-5	HDAC-Pan	1
Droxinostat	99873-43-5	HDAC-Pan (Class I + HDAC6)	0.3
Rocilinostat (ACY-1215)	1316214-52-4	HDAC-Pan (Class I + HDAC6)	0.3
CUDC-907	1339928-25-4	HDAC-Pan (Class I + HDAC6)	0.1
BML-281	1045792-66-2	HDAC-Pan (Class I + HDAC6)	0.3
Resminostat	864814-88-0	HDAC-Pan (Class I + HDAC6)	0.3
Nexturastat A	1403783-31-2	HDAC-Pan (Class I + HDAC6)	3
CAY10683	1477949-42-0	HDAC-Pan (Class I + HDAC6)	10
Lestaurtinib	111358-88-4	JAK	0.1
AT9283	896466-04-9	JAK	0.1
LY2784544	1229236-86-5	JAK	0.3
TG101209	936091-14-4	JAK	0.1
Pacritinib (SB1518)	937272-79-2	JAK	0.3
TG101348 (SAR302503)	936091-26-8	JAK	0.3
CYT387	1056634-68-4	JAK	0.3
AZ 960	905586-69-8	JAK	0.1
AZD1480	935666-88-9	JAK	0.3
WP1066	857064-38-1	JAK	3
ZM 39923 HCl	1021868-92-7	JAK	1
Filgotinib (GLPG0634)	1206161-97-8	JAK	1
S-Ruxolitinib (INCB018424)	941678-49-5	JAK	10
CEP-33779	1257704-57-6	JAK	10
Tofacitinib (CP-690550,Tasocitinib)	540737-29-9	JAK	10
XL019	945755-56-6	JAK	1
WHI-P154	211555-04-3	JAK	3
NVP-BSK805 2HCl	1092499-93-8 (free base)	JAK	3
Baricitinib (LY3009104, INCB028050)	1187594-09-7	JAK	3
GSK-J5 (hydrochloride)	1797983-32-4	KDM-JMJC/D	10
GSK-J1 (sodium salt)	1373422-53-7	KDM-JMJC/D	3
Daminozide	1596-84-5	KDM-JMJC/D	10
IOX1	5852-78-8	KDM-JMJC/D	10
GSK J4 HCl	1797983-09-5	KDM-JMJC/D	10
N-Oxalylglycine	5262-39-5	KDM-JMJC/D	10
ML324	1222800-79-4	KDM-JMJC/D	10
JIB-04	199596-05-9	KDM-JMJC/D	10
SP2509	1423715-09-6	KDM-LSD1	3
GSK-LSD1 (hydrochloride)	1431368-48-7	KDM-LSD1	3
ORY-1001 (RG-6016)	1431326-61-2	KDM-LSD1	10
OG-L002	1357302-64-7	KDM-LSD1	10
2-Hydroxyglutaric Acid (sodium salt)	40951-21-1	KDM-Misc	10
IOX2	931398-72-0	KDM-Misc	3
Tranylcypromine hemisulfate	13492-01-8 (H2SO4)	KDM-Misc	1
2,4-Pyridinedicarboxylic Acid	499-80-9	KDM-Misc	10
EPZ5676	1380288-87-8	KMT-DotL1	10
SGC 0946	1561178-17-3	KMT-DotL1	10
EPZ004777	1338466-77-5	KMT-DotL1	10
CPI-169	1450655-76-1	KMT-EZH1/2	0.3
3-Deazaneplanocin A (DZNeP)	120964-45-6	KMT-EZH1/2	0.3
CPI-360	1802175-06-9	KMT-EZH1/2	0.3
UNC1999	1431612-23-5	KMT-EZH1/2	3
EPZ-6438	1403254-99-8	KMT-EZH1/2	3
EPZ005687	1396772-26-1	KMT-EZH1/2	3
EI1	1418308-27-6	KMT-EZH1/2	1
GSK 126	1346574-57-9	KMT-EZH1/2	3
GSK503	1346572-63-1	KMT-EZH1/2	3
GSK343	1346704-33-3	KMT-EZH1/2	3
UNC0638	1255580-76-7	KMT-G9a/GLP	0.3
BIX-01294	935693-62-2	KMT-G9a/GLP	0.3
UNC0646	1320288-17-2	KMT-G9a/GLP	0.3
UNC0642	1481677-78-4	KMT-G9a/GLP	0.3
BRD4770	1374601-40-7	KMT-G9a/GLP	3
UNC0631	1320288-19-4	KMT-G9a/GLP	1
UNC0321 (trifluoroacetate salt)	1238673-32-9	KMT-G9a/GLP	3
UNC0224	1197196-48-7	KMT-G9a/GLP	3
A-366	1527503-11-2	KMT-G9a/GLP	1
Chaetocin	28097-03-2	KMT-Misc	0.1
UNC0379	1620401-82-2	KMT-Misc	0.3
Sinefungin	58944-73-3	KMT-Misc	10
LLY-507	1793053-37-8	KMT-Misc	1
(R)-PFI-2 (hydrochloride)	1627607-87-7	KMT-Misc	10
A-196	1982372-88-2	KMT-Misc	3
AZ 505	1035227-43-0	KMT-Misc	1
UNC1215	1415800-43-9	L3MBTL	10
UNC669	1314241-44-5	L3MBTL	10
UPF 1069	1048371-03-4	L3MBTL	10
Lomeguatrib	192441-08-0	MGMT	10
MI-2 (hydrochloride)	1271738-62-5	MLL	0.3
MI-3 (Menin-MLL Inhibitor)	1271738-59-0	MLL	0.3
MM-102	1417329-24-8	MLL	10
MI-nc (hydrochloride)	1359873-45-2	MLL	10
WDR5-0103	890190-22-4	MLL	10
Olaparib (AZD2281, Ku-0059436)	763113-22-0	PARP	0.3
BMN 673	1207456-01-6	PARP	0.1
INO-1001 (3-Aminobenzamide)	3544-24-9	PARP	10
Iniparib (BSI-201)	160003-66-7	PARP	10
PJ34	344458-19-1	PARP	3
AZD2461	1174043-16-3	PARP	1
ME0328	1445251-22-8	PARP	10
Veliparib (ABT-888)	912444-00-9	PARP	1
AG-14361	328543-09-5	PARP	1
Rucaparib (AG-014699,PF-01367338)	459868-92-9	PARP	1
SGI-1776 free base	1025065-69-3	PIM	0.3
CX-6258 HCl	1353859-00-3	PIM	0.1
SMI-4a	438190-29-5	PIM	10
AZD1208	1204144-28-4	PIM	1
Ellagic Acid	476-66-4	PRMT	10
AMI-1 (sodium salt)	20324-87-2	PRMT	10
MS023 hydrochloride	1831110-54-3	PRMT	3
MS049 hydrochloride	1502816-23-0	PRMT	10
SGC707	1687736-54-4	PRMT	1
Resveratrol	501-36-0	SIRTa	0.3
SRT1720	1001645-58-4	SIRTa	0.3
Aminoresveratrol sulfate	1224713-76-1	SIRTa	10
CAY10591	839699-72-8	SIRTa	1
BML-278	120533-76-8	SIRTa	1
Triacetylresveratrol	42206-94-0	SIRTa	10
Piceatannol	10083-24-6	SIRTa	3
B2	115687-05-3	SIRTi	0.3
AK-7	420831-40-9	SIRTi	1
Suramin·6Na	129-46-4	SIRTi	1
Splitomicin	1384339	SIRTi	1
Sirtinol	410536-97-9	SIRTi	1
BML-266	96969-83-4	SIRTi	1
Salermide	1105698-15-4	SIRTi	10
SIRT1/2 Inhibitor IV	14513-15-6	SIRTi	10
EX-527	49843-98-3	SIRTi	10
Nicotinamide	98-92-0	SIRTi	3
JGB1741	1256375-38-8	SIRTi	10
AGK2	304896-28-4	SIRTi	10

## Sheet: Table S6
Table S6: Prestwick library
Vendor Compound ID	Molecule Name
Prestw-555	NIFUROXAZIDE Nifuroxazide
Prestw-978	MEMANTINE HYDROCHLORIDE Memantine HCl salt Memantine Hydrochloride Memantine hydrochloride
Prestw-262	TRIPROLIDINE HYDROCHLORIDE Triprolidine hydrochloride
Prestw-353	4-Chloro-N-(2-morpholin-4-yl-ethyl)-benzamide Moclobemide
Prestw-113	CIPROFLOXACIN Ciprofloxacin hydrochloride hydrate Ciprofloxacin hydrochloride monohydrate
Prestw-407	AMANTADINE HYDROCHLORIDE Adamantamine fumarate Amantadine Amantadine hydrochloride
Prestw-820	Aminophylline Aminophylline ethylenediamine THEOPHYLLINE Theophylline monohydrate
Prestw-873	Aminophylline Aminophylline ethylenediamine THEOPHYLLINE Theophylline monohydrate
Prestw-135	L-Glutamic acid, N-[4-[[(2,4-diamino-6-pteridinyl)methyl]methylamino]benzoyl]- [CAS] METHOTREXATE Methotrexate Methotrexate hydrate
Prestw-759	Acetyl-beta-methylcholine chloride METHACHOLINE CHLORIDE Methacholine chloride
Prestw-94	AZATHIOPRINE Azathioprine
Prestw-1489	AMIFOSTINE Amifostine
Prestw-329	9-AMINO-1,2,3,4-TETRAHYDROACRIDINE HYDROCHLORIDE 9-Amino-1,2,3,4-tetrahydroacridine hydrochloride TACRINE HYDROCHLORIDE Tacrine hydrochloride Tacrine hydrochloride hydrate
Prestw-86	ACYCLOVIR Acyclovir
Prestw-1207	ASPIRIN Acetylsalicylic acid Aspirin n/a
Prestw-3	ACETAZOLAMIDE Acetazolamide n/a
Prestw-875	(-)-Isoreserpine RESERPINE Reserpine
Prestw-1206	Acetylcysteine N-Acetyl-Cysteine N-Acetyl-L-Cysteine n/a
Prestw-960	6-Aminohexanoic acid AMINOCAPROIC ACID Aminocaproic acid
Prestw-946	ALTRETAMINE Altretamine
Prestw-55	ACETOHEXAMIDE Acetohexamide
Prestw-7	AMILORIDE HYDROCHLORIDE Amiloride hydrochloride Amiloride hydrochloride dihydrate Amiloride, Hydrochloride Pyrazinecarboxamide, 3,5-diamino-N-(aminoiminomethyl)-6-chloro- [CAS]
Prestw-74	AMITRIPTYLINE HYDROCHLORIDE Amitriptyline Amitriptyline hydrochloride Amitryptiline hydrochloride n/a
Prestw-1178	ANIRACETAM Aniracetam
Prestw-102	AMOXAPINE AMOXEPINE Amoxapine
Prestw-409	AMIODARONE HYDROCHLORIDE Amiodarone hydrochloride Amiodarone·HCl
Prestw-244	(±)-p-Aminoglutethimide AMINOGLUTETHIMIDE Glutethimide, para-amino
Prestw-953	(R)-(+)-Atenolol (S)-(-)-Atenolol
Prestw-250	ALPRENOLOL Alprenolol hydrochloride
Prestw-536	(R)-(+)-Atenolol S(-)-Atenolol
Prestw-276	BUMETANIDE Bumetanide
Prestw-85	(±)-Baclofen BACLOFEN Baclofen Baclofen (R,S)
Prestw-559	BP 897 DO 897/99
Prestw-249	AMFEBUTAMONE HCl BUPROPION BUPROPION HYDROCHLORIDE Bupropion HCl salt Bupropion hydrochloride
Prestw-1076	Ciprofibrate
Prestw-121	(+)-Bromocriptine methanesulfonate Bromocriptine Bromocriptine mesylate Bromocryptine mesylate
Prestw-518	Budesonide
Prestw-382	Betaxolol Betaxolol hydrochloride CPD000058420
Prestw-1086	D-CYCLOSERINE D-cycloserine L-Cycloserine
Prestw-475	(±)-Brompheniramine maleate BROMPHENIRAMINE MALEATE Brompheniramine Brompheniramine maleate DEXBROMPHENIRAMINE MALEATE
Prestw-657	Benzamil hydrochloride
Prestw-587	CILOSTAZOL Cilostazol
Prestw-432	CORTICOSTERONE Corticosterone
Prestw-368	BEPRIDIL HYDROCHLORIDE Bepridil hydrochloride
Prestw-1283	BUSPIRONE HYDROCHLORIDE Buspirone Buspirone hydrochloride n/a
Prestw-1079	CHLORAMBUCIL Chlorambucil
Prestw-1256	CAFFEINE Caffeine n/a
Prestw-323	CHLORPROPAMIDE Chlorpropamide
Prestw-938	BENSERAZIDE HYDROCHLORIDE Benserazide hydrochloride n/a
Prestw-944	PHENOXYBENZAMINE HYDROCHLORIDE Phenoxybenzamine hydrochloride
Prestw-1481	CYCLOPHOSPHAMIDE Cyclophosphamide Cyclophosphamide monohydrate n/a
Prestw-273	CORTISONE Cortisone
Prestw-435	CYCLOSPORIN A CYCLOSPORINE Cyclosporin A Cyclosporin A, Tolypocladium inflatum
Prestw-880	CARBACHOL Carbachol
Prestw-103	CPD000058431 CYPROHEPTADINE HYDROCHLORIDE Cyproheptadine hydrochloride
Prestw-64	CHLORPROMAZINE Chlorpromazine Chlorpromazine hydrochloride
Prestw-763	Centrophenoxine hydrochloride MECLOFENOXATE HYDROCHLORIDE Meclofenoxate hydrochloride
Prestw-1444	1-(2-Chlorophenyl)-1-(4-chlorophenyl)-2,2-dichloroethane MITOTANE Mitotane n/a
Prestw-1089	(S)-(-)-Cycloserine CYCLOSERINE CYCLOSERINE (D) D-CYCLOSERINE D-Cycloserine D-cycloserine L-Cycloserine
Prestw-163	CHLORZOXAZONE Chlorzoxazone
Prestw-251	CHLOROTHIAZIDE Chlorothiazide n/a
Prestw-692	CITALOPRAM HYDROBROMIDE CPD000326936 Citalopram Citalopram Hydrobromide Citalopram hydrobromide ESCITALOPRAM OXALATE
Prestw-814	Cefsulodin sodium salt Cefsulodin sodium salt hydrate
Prestw-117	(±)-Chlorpheniramine maleate Chlorpheniramine Chlorpheniramine maleate DEXCHLORPHENIRAMINE MALEATE
Prestw-700	Cefmetazole sodium Cefmetazole sodium salt
Prestw-736	CEFAZOLIN SODIUM Cefazolin sodium Cefazolin sodium salt
Prestw-350	CLOZAPINE Clozapine
Prestw-139	Cefotaxime sodium Cefotaxime sodium salt
Prestw-719	CEPHALOTHIN SODIUM Cephalothin sodium Cephalothin sodium salt
Prestw-227	CLEMIZOLE HYDROCHLORIDE Clemizole hydrochloride
Prestw-52	CARBAMAZEPINE Carbamazepine
Prestw-26	CIMETIDINE Cimetidine
Prestw-548	CHLOROQUINE DIPHOSPHATE Chloroquine Chloroquine diphosphate
Prestw-19	CAPTOPRIL Captopril
Prestw-445	CYCLOBENZAPRINE HYDROCHLORIDE Cyclobenzaprine HCl salt Cyclobenzaprine hydrochloride
Prestw-1073	BETHANECHOL CHLORIDE Bethanechol chloride
Prestw-1383	CLOFIBRATE Clofibrate n/a
Prestw-269	CLOMIPRAMINE HYDROCHLORIDE Clomipramine HCl salt Clomipramine hydrochloride
Prestw-780	CINOXACIN Cinoxacin
Prestw-363	COLCHICINE Colchicine Colchicine, Colchicum autumnale
Prestw-387	CARBETAPENTANE CITRATE Carbetapentane citrate
Prestw-278	Cinnarizine Cinnarizine, Abitrate
Prestw-267	CLOTRIMAZOLE Clotrimazole
Prestw-1134	2(1H)-Pyrimidinone, 4-amino-1-D-arabinofuranosyl- [CAS] Cytarabine Cytosine-1-beta-D-arabinofuranoside hydrochloride
Prestw-423	CARISOPRODOL Carisoprodol
Prestw-134	Diltiazem hydrochloride n/a
Prestw-1279	2',3'-didehydro-3'-deoxythymidine STAVUDINE Stavudine
Prestw-388	DEQUALINIUM CHLORIDE Dequalinium chloride hydrate Dequalinium dichloride
Prestw-263	Doxepin Doxepin HCl salt Doxepin hydrochloride n/a
Prestw-200	(S)-(+)-Camptothecin CAMPTOTHECIN Camptothecine (S,+)
Prestw-27	CPD000058436 DOXYLAMINE SUCCINATE Doxylamine Doxylamine succinate
Prestw-150	DIHYDROERGOTAMINE MESYLATE Dihydroergotamine methanesulfonate Dihydroergotamine tartrate Dihydroergotoxine mesylate n/a
Prestw-343	DESIPRAMINE HYDROCHLORIDE Desipramine HCl salt, Norimipramine Desipramine hydrochloride
Prestw-1037	2',3'-DIDEOXYCYTIDINE 2',3'-dideoxycytidine Zalcitabine
Prestw-352	Dobutamine hydrochloride
Prestw-236	Dilazep dihydrochloride Dilazep hydrochloride
Prestw-65	CPD000058353 DIPHENHYDRAMINE HYDROCHLORIDE Diphenhydramine Diphenhydramine hydrochloride n/a
Prestw-1177	Carbidopa Carbidopa, MK-486
Prestw-336	CHLORMEZANONE Chlormezanone
Prestw-968	DECAMETHONIUM BROMIDE Decamethonium bromide Decamethonium dibromide
Prestw-1381	Clodronic acid n/a
Prestw-266	DISOPYRAMIDE PHOSPHATE Disopyramide
Prestw-87	DIAZOXIDE Diazoxide
Prestw-1399	DOXYCYCLINE HYDROCHLORIDE Doxycycline Doxycycline hydrochloride n/a
Prestw-753	DEMECLOCYCLINE HYDROCHLORIDE Demeclocycline hydrochloride Tigecycline
Prestw-291	DANTROLENE SODIUM Dantrolene sodium Dantrolene sodium salt
Prestw-340	DOMPERIDONE Domperidone
Prestw-941	Diethylenetriaminepentaacetic acid PENTETIC ACID Pentetic acid
Prestw-48	DICYCLOMINE HYDROCHLORIDE Dicyclomine hydrochloride
Prestw-931	Propofol
Prestw-386	GBR 12909 GBR 12909 dihydrochloride GBR-12909 dihydrochloride Vanoxerine (dihydrochloride) Vanoxerine dihydrochloride, GBR-12909
Prestw-17	L-3,4-Dihydroxyphenylalanine L-Dopa LEVODOPA Levodopa
Prestw-500	ETHAMIVAN Ethamivan Vanillic acid diethylamide
Prestw-142	DIPYRIDAMOLE Dipyridamole
Prestw-858	DOXAZOSIN MESYLATE Doxazosin mesylate
Prestw-231	ETODOLAC Etodolac
Prestw-566	(-)-Physostigmine Eserine hemisulfate salt Eserine sulfate, physostigmine sulfate PHYSOSTIGMINE SALICYLATE PHYSOSTIGMINE SULFATE Physostigmine Physostigmine, Eserine
Prestw-275	FENOFIBRATE Fenofibrate n/a
Prestw-1102	FEXOFENADINE HYDROCHLORIDE Fexofenadine hydrochloride n/a
Prestw-995	Fluvoxamine Fluvoxamine maleate
Prestw-213	FENSPIRIDE HYDROCHLORIDE Fenspiride hydrochloride n/a
Prestw-104	FAMOTIDINE Famotidine
Prestw-316	GLIBENCLAMIDE GLYBURIDE Glibenclamide Glybenclamide Glyburide
Prestw-441	17ß-Estradiol BETA-ESTRADIOL Estradiol Estradiol-17 beta beta-Estradiol n/a
Prestw-478	Felodipine felodipine
Prestw-83	EDROPHONIUM CHLORIDE Edrophonium chloride
Prestw-914	Estrone
Prestw-906	Fluspirilen Fluspirilene
Prestw-339	Guanfacine hydrochloride Guanfacine hydrochloride, Tenex, Intuniv
Prestw-1480	(±)-Epinephrine hydrochloride Racepinephrine hydrochloride n/a
Prestw-312	FLUNARIZINE HYDROCHLORIDE Flunarizine dihydrochloride
Prestw-165	ETHOSUXIMIDE Ethosuximide
Prestw-1203	5-Fluorouracil 5-fluorouracil FLUOROURACIL Fluorouracil n/a
Prestw-839	Ganciclovir
Prestw-740	EBSELEN Ebselen
Prestw-282	FENOTEROL HYDROBROMIDE Fenoterol hydrobromide
Prestw-735	Flecainide acetate
Prestw-157	GALLAMINE GALLAMINE TRIETHIODIDE Gallamine triethiodide
Prestw-320	CPD000058411 FLUFENAZINE HYDROCHLORIDE FLUPHENAZINE HYDROCHLORIDE Fluphenazine Fluphenazine dihydrochloride
Prestw-180	FLUTAMIDE Flutamide
Prestw-511	FLUOXETINE Fluoxetine HCl salt Fluoxetine hydrochloride
Prestw-393	Hemicholinium bromide Hemicholinium-3
Prestw-861	Gabapentin Gabapentin (hydrochloride)
Prestw-115	HALOPERIDOL Haloperidol
Prestw-448	HYDROXYTACRINE MALEATE Hydroxytacrine maleate Hydroxytacrine maleate (R,S)
Prestw-1398	DOPAMINE HYDROCHLORIDE Dopamine Dopamine hydrochloride n/a
Prestw-447	Hydrocortisone Hydrocortisone base
Prestw-1286	Ibudilast n/a
Prestw-96	Guanabenz acetate
Prestw-481	Serotonin Serotonin hydrochloride
Prestw-38	HEXAMETHONIUM BROMIDE Hexamethonium bromide Hexamethonium dibromide dihydrate
Prestw-9	HYDROCHLOROTHIAZIDE Hydrochlorothiazide
Prestw-131	GLIPIZIDE Glipizide
Prestw-911	(+)-Isoproterenol (+)-bitartrate salt (-)-Isoproterenol hydrochloride S(+)-Isoproterenol (+)-bitartrate
Prestw-176	IPRONIAZID SULFATE Iproniazid phosphate Iproniazide phosphate
Prestw-490	Iobenguane sulfate m-Iodobenzylguanidine hemisulfate
Prestw-772	LEFUNAMIDE Leflunomide
Prestw-926	IDAZOXAN HYDROCHLORIDE Idazoxan hydrochloride Idazoxan hydrochloride, RX 781094
Prestw-907	S(+)-Ibuprofen S-(+)-ibuprofen
Prestw-311	Ifenprodil Ifenprodil tartrate
Prestw-389	CPD000058460 Ketoconazole Ketoconazole, Nizoral
Prestw-50	LIDOCAINE LIDOCAINE HYDROCHLORIDE Lidocaine hydrochloride Lidocaïne hydrochloride
Prestw-749	ISOETHARINE MESYLATE Isoetharine mesylate salt Isotharine mesylate
Prestw-1097	(-)-Isoproterenol hydrochloride R(-)-Isoproterenol (+)-bitartrate
Prestw-929	CPD000058461 KETOROLAC TROMETHAMINE Ketorolac Ketorolac tris salt Ketorolac tromethamine
Prestw-238	LOMEFLOXACIN HYDROCHLORIDE Lomefloxacin hydrochloride
Prestw-1432	LORATADINE Loratadine
Prestw-219	KETOPROFEN Ketoprofen
Prestw-277	LABETALOL HYDROCHLORIDE Labetalol hydrochloride
Prestw-1492	LAMOTRIGINE Lamotrigine Lamotrigine, GW 273293 n/a
Prestw-182	(-)-Tetramisole hydrochloride LEVAMISOLE HYDROCHLORIDE Levamisole hydrochloride
Prestw-272	INDOMETHACIN Indomethacin
Prestw-72	IMIPRAMINE HYDROCHLORIDE Imipramine Imipramine hydrochloride
Prestw-371	KETOTIFEN FUMARATE Ketotifen fumarate
Prestw-144	LOPERAMIDE HYDROCHLORIDE Loperamide hydrochloride Loperamide·HCl
Prestw-1072	LANSOPRAZOLE Lansoprazole
Prestw-132	CPD000058470 LOXAPINE SUCCINATE Loxapine Succinate Loxapine succinate
Prestw-1499	4-Methylpyrazole hydrochloride FOMEPIZOLE HYDROCHLORIDE Fomepizole
Prestw-364	Metergoline
Prestw-206	MECLOFENAMATE SODIUM Meclofenamic acid sodium Meclofenamic acid sodium salt monohydrate SODIUM MECLOFENAMATE
Prestw-733	(±)-Metoprolol (+)-tartrate METOPROLOL TARTRATE Metoprolol Metoprolol-(+,-) (+)-tartrate salt
Prestw-915	LORGLUMIDE SODIUM Lorglumide sodium Lorglumide sodium salt
Prestw-100	Nocodazole
Prestw-505	METAPROTERENOL Metaproterenol hemisulfate Metaproterenol sulfate, orciprenaline sulfate
Prestw-1065	MILRINONE Milrinone
Prestw-99	MIANSERIN HYDROCHLORIDE Mianserin hydrochloride Mianserine hydrochloride
Prestw-344	CLORGILINE HYDROCHLORIDE Clorgyline hydrochloride
Prestw-1016	MOXONIDINE HCl Moxonidine Moxonidine hydrochloride n/a
Prestw-1441	Mevastatin mevastatin
Prestw-209	METOCLOPRAMIDE HYDROCHLORIDE Metoclopramide hydrochloride Metoclopramide monohydrochloride
Prestw-42	MOXISYLYTE HYDROCHORIDE Moxisylyte hydrochloride Moxisylyte hydrochoride
Prestw-535	METHOXAMINE HYDROCHLORIDE Methoxamine hydrochloride
Prestw-385	MITOXANTHRONE HYDROCHLORIDE MITOXANTRONE HYDROCHLORIDE Mitoxantrone Mitoxantrone dihydrochloride
Prestw-241	MEXILETINE HYDROCHLORIDE Mexiletene hydrochloride Mexiletine hydrochloride
Prestw-458	MELATONIN Melatonin
Prestw-374	METHYLERGONOVINE MALEATE Methylergometrine maleate Methylergonovine maleate
Prestw-299	MIFEPRISTONE Mifepristone
Prestw-375	METHIOTHEPIN MALEATE METITEPINE MALEATE Methiothepin maleate Methiothepin mesylate
Prestw-383	NICARDIPINE HYDROCHLORIDE Nicardipine Nicardipine hydrochloride
Prestw-346	MAPROTILINE HYDROCHLORIDE Maprotiline HCl salt, Ludiomil Maprotiline hydrochloride Maprotilline HCl
Prestw-468	NEOSTIGMINE BROMIDE Neostigmine bromide
Prestw-63	NIFEDIPINE Nifedipine
Prestw-240	PROGLUMIDE Proglumide
Prestw-1447	NALIDIXIC ACID Nalidixic acid Nalidixic acid sodium Nalidixic acid sodium salt
Prestw-1111	MECAMYLAMINE HYDROCHLORIDE Mecamylamine HCl salt Mecamylamine hydrochloride n/a
Prestw-255	NIFLUMIC ACID Niflumic acid
Prestw-342	METHAPYRILENE HYDROCHLORIDE Methapyrilene hydrochloride
Prestw-326	L-alpha-Methyl DOPA Methyldopa (L,-)
Prestw-194	NIMESULIDE Nimesulide
Prestw-1099	NIALAMIDE Nialamide
Prestw-40	NICLOSAMIDE NICOLSAMIDE Niclosamide
Prestw-254	NORTRIPTYLINE NORTRIPTYLINE HYDROCHLORIDE Nortriptyline hydrochloride
Prestw-109	(+)-MK 801 Maleate (+)-MK-801 hydrogen maleate Dizocilpine maleate MK-801, Dizocilpine
Prestw-108	NOMIFENSIN MALEATE NOMIFENSINE MALEATE Nomifensine maleate
Prestw-928	NILUTAMIDE Nilutamide
Prestw-916	NITREDIPINE NITRENDIPINE Nitrendipine
Prestw-239	ORPHENADRINE CITRATE Orphenadrine hydrochloride
Prestw-1034	Pancuronium Pancuronium bromide
Prestw-188	PENTOLINIUM DITARTRATE Pentolinium bitartrate Pentolinium di[L(+)-tartrate]
Prestw-1482	Sodium Valproate VALPROATE SODIUM Valproate, DPA Valproic Acid (sodium salt) Valproic Acid, Sodium Salt Valproic acid Valproic acid sodium Valproic acid sodium salt (Sodium valproate) n/a
Prestw-289	PYRILAMINE MALEATE Pyrilamine maleate
Prestw-918	NIMODIPINE Nimodipine
Prestw-477	PROGESTERONE Progesterone
Prestw-888	PROMETHAZINE HYDROCHLORIDE Promethazine hydrochloride Promethazine·HCl
Prestw-211	PIROXICAM Piroxicam
Prestw-910	Nisoxetine hydrochloride Nisoxetine hydrochloride, LY-94939
Prestw-224	OXYMETAZOLINE HYDROCHLORIDE Oxymetazoline hydrochloride
Prestw-237	LEVOFLOXACIN OFLOXACIN Ofloxacin
Prestw-778	PROADIFEN HYDROCHLORIDE Proadifen hydrochloride SKF-525A hydrochloride
Prestw-260	PRAZIQUANTEL Praziquantel
Prestw-1454	NYLIDRIN HYDROCHLORIDE Nylidrin Nylidrin hydrochloride
Prestw-499	PROPAFENONE HYDROCHLORIDE Propafenone hydrochloride
Prestw-287	OXYBUTYNIN CHLORIDE Oxybutynin Chloride Oxybutynin chloride
Prestw-1002	5alpha-Pregnan-3alpha-ol-11,20-dione Alfaxalone Alphaxalone
Prestw-125	PERPHENAZINE Perphenazine
Prestw-949	(+,-)-Octopamine hydrochloride (±)-Octopamine hydrochloride OCTOPAMINE HYDROCHLORIDE
Prestw-196	PENTOXIFYLLINE Pentoxifylline
Prestw-683	PEMPIDINE TARTRATE Pempidine tartrate
Prestw-162	PENTETRAZOLE PENTYLENETETRAZOL Pentylenetetrazole
Prestw-975	NAFTOPIDIL Naftopidil dihydrochloride
Prestw-1060	OXAPROZIN Oxaprozin
Prestw-308	PIMOZIDE Pimozide STAT5 Inhibitor III, Pimozide
Prestw-537	PIRACETAM Piracetam
Prestw-449	PILOCARPINE HYDROCHLORIDE PILOCARPINE NITRATE Pilocarpine Pilocarpine nitrate
Prestw-193	OXOLINIC ACID Oxolinic acid
Prestw-90	PINDOLOL Pindolol
Prestw-583	PAPAVERINE HYDROCHLORIDE Papaverine hydrochloride PapaverineÂ·HCl
Prestw-693	PROMAZINE HYDROCHLORIDE Promazine hydrochloride
Prestw-129	PIRENZEPINE HYDROCHLORIDE Pirenzepine dihydrochloride
Prestw-980	Piribedil Piribedil hydrochloride Piribedil maleate
Prestw-41	PROCAINE HYDROCHLORIDE Procaine hydrochloride
Prestw-318	QUINACRINE HYDROCHLORIDE Quinacrine dihydrochloride Quinacrine dihydrochloride dihydrate Quinacrine dihydrochloride hydrate Quinacrine hydrochloride
Prestw-170	PHENELZINE SULFATE PHENELZINE SULFATE SALT Phenelzine sulfate
Prestw-930	PROTRYPTYLINE HYDROCHLORIDE Protriptyline hydrochloride
Prestw-59	PHENIRAMINE MALEATE Pheniramine maleate
Prestw-230	PHENTOLAMINE HYDROCHLORIDE Phentolamine hydrochloride Phentolamine mesylate
Prestw-295	CPD000058504 PERGOLIDE MESYLATE Pergolide mesylate Pergolide methanesulfonate
Prestw-1310	PHENYLBUTAZONE Phenylbutazone
Prestw-337	PROCAINAMIDE HYDROCHLORIDE Procainamide HCl Procainamide hydrochloride
Prestw-119	Picotamide Picotamide monohydrate
Prestw-199	PRILOCAINE HYDROCHLORIDE Prilocaine hydrochloride
Prestw-531	PIRENPERONE Pirenperone
Prestw-280	QUINIDINE GLUCONATE Quinidine Quinidine hydrochloride monohydrate Quinidine·HCl·H2O Quinine·HCl·2H2O
Prestw-514	PYRAZINAMIDE Pyrazinamide Pyrazinecarboxamide
Prestw-827	PROPANTHELINE BROMIDE Propantheline bromide
Prestw-617	QUIPAZINE MALEATE Quipazine dimaleate salt
Prestw-933	PRIMIDONE Primidone
Prestw-183	PARGYLINE HYDROCHLORIDE Pargyline hydrochloride
Prestw-1081	(R)-Propranolol hydrochloride (S)-Propranolol hydrochloride (S)-propranolol hydrochloride DEXPROPRANOLOL HYDROCHLORIDE
Prestw-399	10H-Phenothiazine, 2-chloro-10-[3-(4-methyl-1-piperazinyl)propyl- [CAS] PROCHLORPERAZINE EDISYLATE Prochlorperazine dimaleate
Prestw-1322	PYRIDOSTIGMINE BROMIDE Pyridostigmine bromide Pyridostigmine iodid Pyridostigmine iodide
Prestw-246	PINACIDIL Pinacidil Pinacidil monohydrate
Prestw-56	(±)-Sulpiride LEVOSULPIRIDE Sulpiride
Prestw-862	RALOXIFENE HYDROCHLORIDE Raloxifene Raloxifene hydrochloride
Prestw-966	(±)-Sotalol hydrochloride CPD000326828 SOTALOL HYDROCHLORIDE Sotalol hydrochloride
Prestw-257	13-cis-Retinoic acid 9-cis-Retinoic acid All trans retinoic acid Retinoic acid Retinoic acid, all trans TRETINOIN TRETINON Tretinoin trans-Retinoic Acid
Prestw-1092	RANOLAZINE Ranolazine Ranolazine dihydrochloride
Prestw-993	RIBAVIRIN Ribavirin
Prestw-167	RILUZOLE Riluzole Riluzole hydrochloride
Prestw-288	SPIPERONE Spiperone Spiperone hydrochloride
Prestw-73	SULINDAC Sulindac
Prestw-924	ROLIPRAM Rolipram
Prestw-1029	RISPERIDONE Risperidone
Prestw-256	13-cis-Retinoic acid 13-cis-retinoic acid 9-cis-Retinoic acid All trans retinoic acid ISOTRETINON Isotretinoin Retinoic acid Retinoic acid, all trans
Prestw-1325	Raclopride S(+)-Raclopride L-tartrate
Prestw-1088	(+,-)-Synephrine (±)-Synephrine OXEDRINE SYNEPHRINE Synephrine
Prestw-198	ALBUTEROL Albuterol hemisulfate SALBUTAMOL SULFATE Salbutamol
Prestw-21	SULFAPHENAZOLE Sulfaphenazole
Prestw-945	Salmeterol
Prestw-1158	Ropinirole HCl Ropinirole hydrochloride n/a
Prestw-216	TIAPRIDE HYDROCHLORIDE Tiapride hydrochloride
Prestw-701	Benzhexol hydrochloride TRIHEXYPHENIDYL HYDROCHLORIDE Trihexyphenidyl hydrochloride Trihexyphenidyl-D,L Hydrochloride
Prestw-391	TERBUTALINE HEMISULFATE Terbutaline hemisulfate
Prestw-698	TETRAHYDROZOLINE HYDROCHLORIDE Tetrahydrozoline hydrochloride
Prestw-751	Terazosin Terazosin hydrochloride
Prestw-633	DL-Thiorphan Thiorphan
Prestw-53	TRIFLUPROMAZINE HYDROCHLORIDE Triflupromazine hydrochloride
Prestw-1352	TULOBUTEROL TULOBUTEROL HYDROCHLORIDE Tulobuterol Tulobuterol hydrochloride n/a
Prestw-443	Gabazine bromide SR-95531
Prestw-190	TOLBUTAMIDE Tolbutamide
Prestw-806	TRIMIPRAMINE MALEATE Trimipramine maleate Trimipramine maleate salt
Prestw-292	TRAZODONE HYDROCHLORIDE Trazodone hydrochloride Trazodone, Beneficat
Prestw-97	DISULFIRAM Disulfiram TETRAETHYLTHIURAM DISULFIDE Tetraethylthiuram disulfide
Prestw-120	Triamcinolone
Prestw-874	THEOBROMINE Theobromine
Prestw-948	S(-)-Timolol maleate Timolol maleate salt
Prestw-392	KETANSERIN TARTRATE Ketanserin Ketanserin tartrate Ketanserin tartrate hydrate
Prestw-1198	TRANILAST Tranilast
Prestw-545	Levamisole hydrochloride TETRAMIZOLE HYDROCHLORIDE Tetramisole hydrochloride
Prestw-554	TOLAZAMIDE Tolazamide
Prestw-34	TRIAMTERENE Triamterene
Prestw-146	TAMOXIFEN CITRATE Tamoxifen Tamoxifen Citrate Tamoxifen citrate
Prestw-303	TELENZEPINE HYDROCHLORIDE Telenzepine dihydrochloride
Prestw-584	Corynanthine Rauwolscine Yohimbine hydrochloride Yohimbine·HCl
Prestw-571	TETRACAINE HYDROCHLORIDE Tetracaine hydrochloride Tetracaïne hydrochloride
Prestw-138	TERFENADINE Terfenadine
Prestw-922	Thioperamide maleate
Prestw-228	TROPICAMIDE Tropicamide
Prestw-192	(±)-Thalidomide THALIDOMIDE Thalidomide
Prestw-313	CPD000059133 TRIFLUOPERAZINE HYDROCHLORIDE Trifluoperazine dihydrochloride Trifluoperazine·2HCl
Prestw-972	GABOXADOL HYDROCHLORIDE Gaboxadol hydrochloride, THIP THIP Hydrochloride THIP hydrochloride
Prestw-141	(±)-Verapamil hydrochloride (±)-Verapamil, Hydrochloride Benzeneacetonitrile, Alpha-[3-[[2-(3,4-dimethoxyphenyl)ethyl]methylamino]propyl]-3,4-dimethoxy-Alpha-(1-methylethyl)-, (R)- [CAS] VERAPAMIL HYDROCHLORIDE Verapamil Verapamil hydrochloride Verapamil·HCl
Prestw-335	ZAPRINAST Zaprinast
Prestw-598	XYLAZINE Xylazine Xylazine hydrochloride
Prestw-78	THIORIDAZINE HYDROCHLORIDE Thioridazine hydrochloride
Prestw-268	VINPOCETINE Vinpocetin Vinpocetine Vinpocetine, Cavinton, Intelectol
Prestw-923	Xamoterol hemifumarate
Prestw-977	3(2H)-Pyridazinone, 6-[4-(difluoromethoxy)-3-methoxyphenyl]- [CAS] Zardaverine
Prestw-976	Tracazolate Tracazolate hydrochloride
Prestw-905	URAPIDIL URAPIDIL HYDROCHLORIDE Urapidil hydrochloride
Prestw-223	XYLOMETAZOLINE HYDROCHLORIDE Xylometazoline hydrochloride
Prestw-1367	ESZOPICLONE Zopiclone
Prestw-208	TRIMETHOPRIM Trimethoprim
Prestw-501	(±)-gamma-Vinyl GABA VIGABATRIN Vigabatrin Vigabatrin hydrochloride
Prestw-868	ACETAMINOPHEN Acetaminophen
Prestw-174	ALVERINE CITRATE Alverine citrate salt
Prestw-1202	4-aminosalicylic acid AMINOSALICYLATE SODIUM MESALAMINE SODIUM p-AMINOSALICYLATE n/a
Prestw-114	AMPICILLIN SODIUM Ampicillin trihydrate
Prestw-8	AMPROLIUM Amprolium hydrochloride
Prestw-258	ANTAZOLINE PHOSPHATE Antazoline hydrochloride n/a
Prestw-1224	ANTHRALIN Anthralin n/a
Prestw-29	ANTIPYRINE Antipyrine
Prestw-708	BENZETHONIUM CHLORIDE Benzethonium chloride
Prestw-712	BENZOCAINE Benzocaine
Prestw-824	BENZTHIAZIDE Benzthiazide
Prestw-419	BISACODYL Bisacodyl
Prestw-1179	BUSULFAN Busulfan
Prestw-143	CHLORHEXIDINE CHLORHEXIDINE DIHYDROCHLORIDE Chlorhexidine
Prestw-801	CARBINOXAMINE MALEATE Carbinoxamine maleate salt
Prestw-434	CEFADROXIL Cefadroxil
Prestw-757	CHLOROTRIANISENE Chlorotrianisene
Prestw-145	AUREOMYCIN CHLORTETRACYCLINE HYDROCHLORIDE Chlortetracycline hydrochloride
Prestw-351	CHLORTHALIDONE Chlorthalidone
Prestw-822	CLIDINIUM BROMIDE Clidinium bromide
Prestw-783	CLOFIBRIC ACID Clofibric acid
Prestw-186	CLOXACILLIN SODIUM Cloxacillin sodium salt
Prestw-812	CROMOLYN SODIUM Cromolyn disodium salt
Prestw-1095	CYCLOPENTOLATE HYDROCHLORIDE Cyclopentolate hydrochloride
Prestw-574	DACARBAZINE Dacarbazine
Prestw-35	DAPSONE Dapsone
Prestw-725	DEFEROXAMINE MESYLATE Deferoxamine Mesylate Deferoxamine mesylate
Prestw-359	DEXTROMETHORPHAN HYDROBROMIDE Dextromethorphan hydrobromide monohydrate d-3-Methoxy-N-methylmorphinan hydrobromide
Prestw-76	DIBUCAINE HYDROCHLORIDE Dibucaine n/a
Prestw-594	DICLOFENAC SODIUM Diclofenac Acid Diclofenac Sodium Diclofenac sodium
Prestw-450	DICLOXACILLIN SODIUM Dicloxacillin sodium salt hydrate
Prestw-785	DICUMAROL Dicoumarol Dicumarol
Prestw-798	DIENESTROL Dienestrol
Prestw-284	DIETHYLCARBAMAZINE CITRATE Diethylcarbamazine citrate
Prestw-756	DIETHYLSTILBESTROL Diethylstilbestrol
Prestw-39	DIFLUNISAL Diflunisal n/a
Prestw-265	CPD000058353 DIMENHYDRINATE Dimenhydrinate n/a
Prestw-829	DIMETHADIONE Dimethadione n/a
Prestw-898	DIOXYBENZONE Dioxybenzone
Prestw-707	DIPHENYLPYRALINE HYDROCHLORIDE Diphenylpyraline hydrochloride
Prestw-264	DYCLONINE HYDROCHLORIDE Dyclonine hydrochloride
Prestw-33	DYPHYLLINE Diprophylline Dyphylline
Prestw-151	ERYTHROMYCIN Erythromycin
Prestw-259	ETHACRYNIC ACID Ethacrynic acid
Prestw-526	ETHIONAMIDE Ethionamide
Prestw-840	ETHOPROPAZINE HYDROCHLORIDE Ethopropazine hydrochloride n/a
Prestw-917	FLURBIPROFEN Flurbiprofen
Prestw-808	FURAZOLIDONE Furazolidone
Prestw-341	FUROSEMIDE Furosemide
Prestw-214	GEMFIBROZIL Gemfibrozil
Prestw-226	(+)-Griseofulvin GRISEOFULVIN Griseofulvin
Prestw-776	GUAIFENESIN Guaifenesin
Prestw-317	GUANETHIDINE MONOSULFATE GUANETHIDINE SULFATE Guanethidine sulfate
Prestw-1269	HALOPROGIN Haloprogin
Prestw-1472	HEXACHLOROPHENE Hexachlorophene n/a
Prestw-13	HYDROFLUMETHIAZIDE Hydroflumethiazide
Prestw-220	INDAPAMIDE Indapamide
Prestw-836	INDOPROFEN Indoprofen
Prestw-161	ISONIAZID Isoniazid
Prestw-770	ISOPROPAMIDE IODIDE Isopropamide iodide
Prestw-714	ISOSORBIDE DINITRATE Isosorbide dinitrate n/a
Prestw-394	KANAMYCIN A SULFATE Kanamycin A sulfate Kanamycin sulfate
Prestw-738	Folinic acid calcium salt LEUCOVORIN CALCIUM leucovorin
Prestw-739	LEVONORDEFRIN Levonordefrin
Prestw-166	MAFENIDE HYDROCHLORIDE Mafenide hydrochloride
Prestw-457	MECLIZINE HYDROCHLORIDE Meclozine dihydrochloride
Prestw-653	MEPENZOLATE BROMIDE Mepenzolate bromide
Prestw-1469	MERCAPTOPURINE Mercaptopurine
Prestw-1282	METHENAMINE Methenamine n/a
Prestw-184	METHOCARBAMOL Methocarbamol
Prestw-81	METRONIDAZOLE Metronidazole
Prestw-67	MICONAZOLE NITRATE Miconazole
Prestw-741	NADIDE Nadide
Prestw-111	NALOXONE HYDROCHLORIDE Naloxone hydrochloride
Prestw-46	NAPHAZOLINE HYDROCHLORIDE Naphazoline hydrochloride
Prestw-881	NIACIN Niacin Nicotinic Acid Nicotinic acid
Prestw-168	NITROFURANTOIN Nitrofurantoin
Prestw-492	NITROFURAZONE Nitrofural
Prestw-112	METOLAZONE Metolazone
Prestw-221	NORFLOXACIN Norfloxacin
Prestw-834	NOVOBIOCIN SODIUM Novobiocin sodium salt
Prestw-1475	OXACILLIN SODIUM Oxacillin sodium
Prestw-887	OXYBENZONE Oxybenzone
Prestw-1049	OXYPHENBUTAZONE Oxyphenbutazone
Prestw-307	OXYTETRACYCLINE Oxytetracycline Oxytetracycline dihydrate
Prestw-1078	Benzylpenicillin sodium PENICILLIN G POTASSIUM
Prestw-752	PHENAZOPYRIDINE HYDROCHLORIDE Phenazopyridine hydrochloride n/a
Prestw-538	PHENINDIONE Phenindione
Prestw-755	PIPERACILLIN SODIUM Piperacillin sodium salt
Prestw-947	PRAZOSIN HYDROCHLORIDE Prazosin Prazosin hydrochloride
Prestw-476	PRIMAQUINE DIPHOSPHATE PRIMAQUINE PHOSPHATE Primaquine diphosphate
Prestw-542	PROBENECID Probenecid
Prestw-844	PROCYCLIDINE HYDROCHLORIDE Procyclidine hydrochloride
Prestw-494	PROPYLTHIOURACIL Propylthiouracil
Prestw-37	PYRIMETHAMINE Pyrimethamine
Prestw-970	ROXARSONE Roxarsone
Prestw-732	STREPTOZOSIN Streptozotocin
Prestw-711	SULFABENZAMIDE Sulfabenzamide
Prestw-23	SULFADIAZINE Silver sulfadiazine Sulfadiazine
Prestw-694	SULFAMERAZINE Sulfamerazine
Prestw-775	SULFAMETHAZINE Sulfamethazine sodium salt
Prestw-742	SULFAMETHIZOLE Sulfamethizole
Prestw-177	SULFAMETHOXAZOLE Sulfamethoxazole
Prestw-762	SULFAPYRIDINE Sulfapyridine
Prestw-520	SULFASALAZINE Sulfasalazine Sulfasalazine (SASP)
Prestw-16	SULFATHIAZOLE Sulfathiazole
Prestw-290	SULFINPYRAZONE Sulfinpyrazone
Prestw-334	SULFISOXAZOLE Sulfisoxazole
Prestw-140	TETRACYCLINE HYDROCHLORIDE Tetracycline Tetracycline hydrochloride
Prestw-524	THIABENDAZOLE Tiabendazole
Prestw-1194	THIMEROSAL Thimerosal
Prestw-60	TOLAZOLINE HYDROCHLORIDE Tolazoline hydrochloride
Prestw-856	TOLMETIN SODIUM Tolmetin sodium salt dihydrate
Prestw-70	TOLNAFTATE Tolnaftate
Prestw-825	TRICHLORMETHIAZIDE Trichlormethiazide
Prestw-842	TRIMEPRAZINE TARTRATE Trimeprazine tartrate
Prestw-80	TRIMETHOBENZAMIDE HYDROCHLORIDE Trimethobenzamide hydrochloride
Prestw-709	4,5',8-Trimethylpsoralen TRIOXSALEN Trioxsalen
Prestw-1199	TRIPELENNAMINE CITRATE TRIPELENNAMINE HYDROCHLORIDE Tripelennamine hydrochloride n/a
Prestw-768	VIDARABINE Vidarabine
Prestw-1363	WARFARIN Warfarin
Prestw-779	ZOMEPIRAC SODIUM Zomepirac sodium salt
Prestw-181	AMINOPHENAZONE Ampyrone
Prestw-699	HEXESTROL Hexestrol n/a
Prestw-551	HEXETIDINE Hexetidine
Prestw-91	KHELLIN Khellin
Prestw-553	PENTAMIDINE ISETHIONATE Pentamidine isethionate
Prestw-533	PHENACETIN Phenacetin
Prestw-723	PHENETHICILLIN POTASSIUM Phenethicillin potassium salt
Prestw-729	SULFANILAMIDE Sulfanilamide
Prestw-69	ACEBUTOLOL HYDROCHLORIDE Acebutolol hydrochloride
Prestw-296	ACEMETACIN Acemetacin
Prestw-367	BENFLUOREX HYDROCHLORIDE Benfluorex Benfluorex hydrochloride
Prestw-543	BETAHISTINE HYDROCHLORIDE Betahistine mesylate
Prestw-659	6-Furfurylaminopurine KINETIN Kinetin
Prestw-485	CEFACLOR Cefaclor hydrate
Prestw-403	LEVOTHYROXINE THYROXINE Thyroxine Thyroxine (L)
Prestw-204	FLUMEQUINE Flumequine
Prestw-293	GLAFENINE Glafenine hydrochloride
Prestw-765	ETHOXYQUIN Ethoxyquin
Prestw-789	DROFENINE HYDROCHLORIDE Drofenine hydrochloride
Prestw-830	ETHAVERINE HYDROCHLORIDE Ethaverine hydrochloride
Prestw-360	DROPERIDOL Droperidol
Prestw-245	DROPROPIZINE Dropropizine (R,S)
Prestw-218	FENBUFEN Fenbufen
Prestw-754	FENOPROFEN Fenoprofen calcium salt dihydrate
Prestw-203	FLUFENAMIC ACID Flufenamic acid
Prestw-210	FENBENDAZOLE Fenbendazole
Prestw-270	FENDILINE HYDROCHLORIDE Fendiline hydrochloride
Prestw-54	MEFENAMIC ACID Mefenamic acid
Prestw-964	METHACYCLINE HYDROCHLORIDE Methacycline Methacycline hydrochloride
Prestw-215	MEFEXAMIDE MEFEXAMIDE HYDROCHLORIDE Mefexamide hydrochloride
Prestw-384	PROBUCOL Probucol
Prestw-217	MEBENDAZOLE Mebendazole
Prestw-118	NALBUPHINE HYDROCHLORIDE Nalbuphine Nalbuphine hydrochloride
Prestw-310	MEBEVERINE HYDROCHLORIDE Mebeverine hydrochloride
Prestw-456	MECLOCYCLINE SULFOSALICYLATE Meclocycline sulfosalicylate
Prestw-66	MINAPRINE HYDROCHLORIDE Minaprine Minaprine dihydrochloride
Prestw-1511	ACECLIDINE HYDROCHLORIDE Aceclidine Hydrochloride
Prestw-229	NEFOPAM Nefopam hydrochloride
Prestw-147	NICERGOLINE Nicergoline Nicergoline, Sermion
Prestw-716	PRAMOXINE HYDROCHLORIDE Pramoxine hydrochloride
Prestw-178	MEPHENESIN Mephenesin
Prestw-715	SULFACHLORPYRIDAZINE Sulfachloropyridazine
Prestw-728	SULFADIMETHOXINE Sulfadimethoxine
Prestw-731	SULFAQUINOXALINE SODIUM Sulfaquinoxaline sodium salt
Prestw-10	SULFAGUANIDINE Sulfaguanidine
Prestw-823	SULFAMONOMETHOXINE Sulfamonomethoxine
Prestw-810	SULCONAZOLE NITRATE Sulconazole nitrate
Prestw-1115	RONIDAZOLE Ronidazole n/a
Prestw-769	SULFAMETER Sulfameter
Prestw-724	SULFAMETHOXYPYRIDAZINE Sulfamethoxypyridazine
Prestw-658	SUXIBUZONE Suxibuzone
Prestw-641	SULMAZOLE Sulmazole
Prestw-816	SUPROFEN Suprofen
Prestw-71	TODRALAZINE HYDROCHLORIDE Todralazine hydrochloride
Prestw-304	ECONAZOLE NITRATE Econazole nitrate
Prestw-205	TOLFENAMIC ACID Tolfenamic acid
Prestw-588	GALANTAMINE GALANTHAMINE HYDROBROMIDE Galantamine HBr salt Galanthamine Galanthamine hydrobromide Galanthamine·HBr
Prestw-314	ENALAPRIL MALEATE Enalapril Enalapril maleate Enalapril, Vasotec, Enaladex n/a
Prestw-301	LISINOPRIL Lisinopril
Prestw-896	ACETYL-L-LEUCINE N-Acetyl-L-leucine
Prestw-243	BUFEXAMAC Bufexamac
Prestw-815	FOSFOSAL Fosfosal
Prestw-1487	MESNA Mesna n/a
Prestw-869	PHTHALYLSULFATHIAZOLE Phthalylsulfathiazole
Prestw-897	PIPEMIDIC ACID Pipemidic acid
Prestw-702	SUCCINYLSULFATHIAZOLE Succinylsulfathiazole
Prestw-171	TRANEXAMIC ACID Tranexamic acid
Prestw-805	PIROMIDIC ACID Piromidic acid
Prestw-378	BEZAFIBRATE Bezafibrate
Prestw-333	ZIDOVUDINE [AZT] Zidovudine, AZT
Prestw-790	CYCLOHEXIMIDE Cycloheximide
Prestw-1055	PIPERIDOLATE HYDROCHLORIDE Piperidolate hydrochloride
Prestw-607	(-)-Eburnamonine EBURNAMONINE Eburnamonine (-) n/a
Prestw-760	PIPENZOLATE BROMIDE Pipenzolate bromide
Prestw-2	ALLANTOIN Allantoin
Prestw-895	4-Aminohippuric acid AMINOHIPPURIC ACID Aminohippuric acid
Prestw-126	MEFLOQUINE Mefloquine hydrochloride
Prestw-75	ADIPHENINE HYDROCHLORIDE Adiphenine hydrochloride
Prestw-777	ALEXIDINE HYDROCHLORIDE Alexidine dihydrochloride
Prestw-799	PRIDINOL METHANESULFONATE Pridinol methanesulfonate salt
Prestw-366	AMBROXOL HYDROCHLORIDE Ambroxol Ambroxol hydrochloride
Prestw-800	AMRINONE Amrinone
Prestw-803	PYRITHYLDIONE Pyrithyldione
Prestw-784	BENDROFLUMETHIAZIDE BENDROFUMETHIAZIDE Bendroflumethiazide
Prestw-1246	BROMHEXINE HYDROCHLORIDE Bromhexine hydrochloride n/a
Prestw-704	BROMOPRIDE Bromopride
Prestw-25	THIAMPHENICOL Thiamphenicol
Prestw-527	TENOXICAM Tenoxicam
Prestw-1474	CHLOROXINE Chloroxine
Prestw-348	CHLORPROTHIXENE HYDROCHLORIDE Chlorprothixene hydrochloride
Prestw-1401	ENOXACIN Enoxacin n/a
Prestw-15	HEPTAMINOL HYDROCHLORIDE Heptaminol hydrochloride
Prestw-298	FIPEXIDE HYDROCHLORIDE Fipexide hydrochloride Fipexide hydrochloride, Attentil, Vigilor
Prestw-286	PERHEXILINE MALEATE PERHEXILLINE MALEATE Perhexiline maleate
Prestw-225	NIFENAZONE Nifenazone
Prestw-355	HYCANTHONE Hycanthone
Prestw-44	ISOXICAM Isoxicam
Prestw-726	MEPHENTERMINE SULFATE Mephentermine hemisulfate
Prestw-802	METHAZOLAMIDE Methazolamide Methazolamide, MZM
Prestw-705	METHYLBENZETHONIUM CHLORIDE METHYLBENZTHONIUM CHLORIDE Methyl benzethonium chloride
Prestw-818	NADOLOL Nadolol
Prestw-854	ROXITHROMYCIN Roxithromycin
Prestw-713	DIPYRONE Dipyrone
Prestw-835	TETROQUINONE Tetrahydroxy-1,4-quinone monohydrate
Prestw-58	OXETHAZAINE OXETHAZINE Oxethazaine
Prestw-1460	OXYBENDAZOLE Oxibendazol
Prestw-649	ETANIDAZOLE Etanidazole
Prestw-377	NAFRONYL OXALATE Nafronyl oxalate
Prestw-974	PRONETALOL HYDROCHLORIDE PRONETHALOL HYDROCHLORIDE Pronethalol hydrochloride
Prestw-1108	MEPHENTOIN Mephenytoin n/a
Prestw-305	BUPIVACAINE HYDROCHLORIDE Bupivacaine Bupivacaine hydrochloride
Prestw-722	Isopyrin hydrochloride RAMIFENAZONE RAMIPHENAZONE
Prestw-247	ALBENDAZOLE Albendazole
Prestw-831	BUTACAINE Butacaine
Prestw-345	CLENBUTEROL HYDROCHLORIDE Clenbuterol hydrochloride
Prestw-793	CLOPERASTINE HYDROCHLORIDE Cloperastine hydrochloride
Prestw-1052	IOPANIC ACID Iopanoic acid
Prestw-1361	VILOXAZINE HYDROCHLORIDE Viloxazine hydrochloride n/a
Prestw-61	MORANTEL CITRATE Morantel tartrate
Prestw-909	NABUMETONE Nabumetone
Prestw-1371	CELECOXIB Celecoxib n/a
Prestw-1417	FLUCONAZOLE Fluconazole n/a
Prestw-516	LOVASTATIN Lovastatin
Prestw-761	BUTAMBEN Butamben
Prestw-136	ASTEMIZOLE Astemizole
Prestw-498	ARTEMISININ Artemesinin Artemisinin artemisinin
Prestw-851	PAROXETINE HYDROCHLORIDE Paroxetine Paroxetine Hydrochloride Paroxetine hydrochloride hemihydrate (MW = 374.83)
Prestw-380	CLEBOPRIDE MALEATE Clebopride malate Clebopride maleate
Prestw-544	TOBRAMYCIN Tobramycin Tobramycin, Free Base
Prestw-1342	SILDENAFIL SILDENAFIL CITRATE Sildenafil n/a
Prestw-294	PIMETHIXENE MALEATE Pimethixene maleate
Prestw-832	CEFOXITIN SODIUM Cefoxitin sodium salt
Prestw-927	QUINAPRIL HYDROCHLORIDE Quinapril HCl Quinapril hydrochloride
Prestw-191	MIDODRINE HYDROCHLORIDE Midodrine hydrochloride
Prestw-172	7-HYDROXYETHYLTHEOPHYLLINE Etofylline
Prestw-332	PRACTOLOL Practolol
Prestw-1026	ARBUTIN Arbutin
Prestw-532	Isoquinoline, 6,7-dimethoxy-1-methyl-1,2,3,4-tetrahydro, hydrochloride SALSOLIDINE Salsolodine
Prestw-510	CYCLIZINE Cyclizine hydrochloride
Prestw-721	ALTHIAZIDE Althiazide n/a
Prestw-558	GLICLAZIDE Gliclazide
Prestw-766	TINIDAZOLE Tinidazole
Prestw-557	DIRITHROMYCIN Dirithromycin
Prestw-1252	BUTENAFINE HYDROCHLORIDE Butenafine Hydrochloride
Prestw-1491	PENTOBARBITAL Pentobarbital
Prestw-1170	VENLAFAXINE HCl VENLAFAXINE HYDROCHLORIDE Venlafaxine Venlafaxine HCl salt Venlafaxine hydrochloride
Prestw-1284	HYDROXYCHLOROQUINE HYDROXYCHLOROQUINE SULFATE Hydroxychloroquine Hydroxychloroquine sulfate
Prestw-306	CLEMASTINE CLEMASTINE FUMARATE Clemastine fumarate
Prestw-1280	MEPIVACAINE HYDROCHLORIDE Mepivacaine hydrochloride n/a
Prestw-1316	PRAMIPEXOLE DIHYDROCHLORIDE PRAMIPEXOLE HCl Pramipexole Pramipexole dihydrochloride
Prestw-1167	DIACERIN Diacerein
Prestw-999	CHLORGUANIDE HYDROCHLORIDE CHLOROGUANIDE HYDROCHLORIDE Proguanil hydrochloride
Prestw-328	ZOXAZOLAMINE Zoxazolamine
Prestw-324	1R,2S-PHENYLPROPYLAMINE Phenylpropanolamine Phenylpropanolamine hydrochloride
Prestw-98	Acetylsalicylsalicylic acid DIPLOSALSALATE
Prestw-1251	BUTALBITAL Butalbital
Prestw-1261	CARPROFEN Carprofen n/a
Prestw-534	ATOVAQUONE Atovaquone
Prestw-1419	Fluocinolone acetonide n/a
Prestw-1	Azaguanine-8
Prestw-373	Amethopterin (R,S) L-Glutamic acid, N-[4-[[(2,4-diamino-6-pteridinyl)methyl]methylamino]benzoyl]- [CAS] METHOTREXATE(+/-) Methotrexate
Prestw-782	Picropodophyllin Podophyllotoxin podophyllotoxin
Prestw-529	Mesoridazine Mesoridazine besylate
Prestw-92	Zimelidine dihydrochloride monohydrate
Prestw-796	Lithocholic acid
Prestw-370	3-[3,5-DIBROMO-4-HYDROXYBENZOYL]-2-ETHYLBENZOFURAN BENZBROMARONE Benzbromarone
Prestw-1196	TOPOTECAN HCL Topotecan Topotecan hydrochloride n/a
Prestw-156	IVERMECTIN Ivermectin
Prestw-487	DAUNORUBICIN Daunorubicin Daunorubicin hydrochloride
Prestw-706	CHLORCYCLIZINE HYDROCHLORIDE Chlorcyclizine hydrochloride
Prestw-884	MEGLUMINE Meglumine
Prestw-137	CLINDAMYCIN HYDROCHLORIDE Clindamycin hydrochloride
Prestw-541	CICLOPIROX OLAMINE Ciclopirox ethanolamine
Prestw-1234	AZITHROMYCIN Azithromycin n/a
Prestw-1505	VALACICLOVIR HYDROCHLORIDE VALACYCLOVIR HYDROCHLORIDE Valacyclovir hydrochloride
Prestw-197	METARAMINOL BITARTRATE Metaraminol bitartrate
Prestw-1378	CLARITHROMYCIN Clarithromycin n/a
Prestw-853	LIOTHYRONINE (L- isomer) SODIUM Liothyronine
Prestw-1294	ISOSORBIDE MONONITRATE Isosorbide mononitrate
Prestw-1107	RAMIPRIL Ramipril n/a
Prestw-1350	TELMISARTAN Telmisartan n/a
Prestw-1014	SERTRALINE HYDROCHLORIDE Sertraline Sertraline HCl salt Sertraline hydrochloride
Prestw-322	ALFUZOSIN ALFUZOSIN HYDROCHLORIDE Alfuzosin hydrochloride
Prestw-1101	PERINDOPRIL ERBUMINE Perindopril n/a
Prestw-1159	SIBUTRAMINE HCl SIBUTRAMINE HYDROCHLORIDE Sibutramine Sibutramine HCl Sibutramine hydrochloride
Prestw-1263	CEFDINIR Cefdinir n/a
Prestw-1190	OLMESARTAN MEDOXOMIL Olmesartan n/a
Prestw-1249	FAMCICLOVIR Famciclovir n/a
Prestw-1129	BENAZEPRIL HCl BENAZEPRIL HYDROCHLORIDE Benazepril HCl Benazepril hydrochloride
Prestw-1130	AZELASTINE HCl AZELASTINE HYDROCHLORIDE Azelastine HCl Azelastine hydrochloride
Prestw-1117	AZAPERONE Azaperone n/a
Prestw-1125	OXICONAZOLE NITRATE Oxiconazole Nitrate
Prestw-1339	SARAFLOXACIN HYDROCHLORIDE Sarafloxacin
Prestw-1353	TYLOSIN TARTRATE Tylosin
Prestw-1241	BIFONAZOLE Bifonazole n/a
Prestw-1303	PEFLOXACIN MESYLATE PEFLOXACINE MESYLATE Pefloxacine
Prestw-1459	OXFENDAZOLE Oxfendazol
Prestw-951	483-63-6 CROTAMITON Crotamiton
Prestw-1265	GATIFLOXACIN Gatifloxacin n/a
Prestw-1433	LOSARTAN Losartan n/a
Prestw-1262	CARVEDILOL Carvedilol n/a
Prestw-1156	OXCARBAZEPINE Oxcarbazepine Trileptal
Prestw-865	SIMVASTATIN Simvastatin n/a
Prestw-1336	ROFECOXIB Rofecoxib
Prestw-1323	QUETIAPINE QUETIAPINE HEMIFUMARATE Quetiapine Quetiapine fumarate Quetiapine hemifumarate
Prestw-1210	ALENDRONATE SODIUM Alendronate sodium
Prestw-1315	Clavulanate potassium salt n/a
Prestw-540	CLORSULON Clorsulon
Prestw-886	CLIOQUINOL Clioquinol
Prestw-1455	OLANZAPINE Olanzapine
Prestw-1090	HOMOSALATE Homosalate
Prestw-992	PIZOTYLINE MALATE Pizotifen Pizotifen malate Pizotyline
Prestw-1314	PIOGLITAZONE HCl PIOGLITAZONE HYDROCHLORIDE Pioglitazone Pioglitazone hydrochloride
Prestw-576	ACEPROMAZINE MALEATE Acetopromazine maleate salt n/a
Prestw-903	DILOXANIDE FUROATE Diloxanide furoate
Prestw-863	ETIDRONATE DISODIUM Etidronic acid, disodium salt
Prestw-833	IFOSFAMIDE Ifosfamide
Prestw-1479	TRICLOSAN Triclosan n/a
Prestw-1195	TOLTRAZURIL Toltrazuril n/a
Prestw-47	TICLOPIDINE HCl TICLOPIDINE HYDROCHLORIDE Ticlopidine hydrochloride
Prestw-1308	Phentermine hydrochloride n/a
Prestw-1184	TIOCONAZOLE Tioconazole
Prestw-1449	NIACINAMIDE NICOTINAMIDE Niacinamide Nicotinamide
Prestw-1390	8-Chloro-11-piperidin-4-ylidene-6,11-dihydro-5H-benzo[5,6]cyclohepta[1,2-b]pyridine DESLORATIDINE Desloratadine n/a
Prestw-666	NISOLDIPINE Nisoldipine
Prestw-1038	Methyldopate hydrochloride
Prestw-1356	VARDENAFIL CITRATE VARDENAFIL HYDROCHLORIDE Vardenafil n/a
Prestw-1346	SUMATRIPTAN SUCCINATE Sumatriptan succinate
Prestw-503	CETIRIZINE HYDROCHLORIDE Cetirizine dihydrochloride LEVOCETIRIZINE levocetirizine
Prestw-1147	MODAFINIL Modafinil
Prestw-623	PYRIDOXINE Pyridoxine Pyridoxine hydrochloride
Prestw-509	BROMPERIDOL Bromperidol
Prestw-376	CLOFAZIMINE Clofazimine
Prestw-297	BENZYDAMINE HYDROCHLORIDE Benzydamine hydrochloride
Prestw-1495	RABEPRAZOLE SODIUM Rabeprazole Rabeprazole Sodium salt
Prestw-1365	ZILEUTON Zileuton
Prestw-1229	ARIPIPRAZOLE Aripiprazole n/a
Prestw-4	1,1-Dimethylbiguanide 1,1-Dimethylbiguanide, Hydrochloride METFORMIN HYDROCHLORIDE Metformin HCl Metformin hydrochloride Metformin·HCl
Prestw-961	DENATONIUM BENZOATE Denatonium benzoate
Prestw-179	PHENFORMIN HYDROCHLORIDE Phenformin HCl Phenformin hydrochloride
Prestw-164	ORNIDAZOLE Ornidazole
Prestw-1514	DARIFENACIN HYDROBROMIDE Darifenacin hydrobromide
Prestw-1502	ACAMPROSATE CALCIUM Acamprosate Ca salt Acamprosate calcium
Prestw-330	BISOPROLOL FUMARATE Bisoprolol fumarate Bisoprolol hemifumarate salt
Prestw-493	OMEPRAZOLE Omeprazole
Prestw-959	PROPARACAINE HYDROCHLORIDE Proparacaine hydrochloride
Prestw-1197	TOREMIFENE CITRATE TOREMIPHENE CITRATE Toremifene
Prestw-1516	LEVALBUTEROL HYDROCHLORIDE Levalbuterol hydrochloride SALBUTAMOL SULFATE Salbutamol
Prestw-1493	TOPIRAMATE Topiramate Topiramate, Topamax
Prestw-300	DIPERODON HYDROCHLORIDE Diperodon hydrochloride
Prestw-936	BEPHENIUM HYDROXYNAPTHOATE Bephenium hydroxynaphthoate
Prestw-51	TRICHLORFON Trichlorfon
Prestw-786	METHIMAZOLE Methimazole
Prestw-515	TRIMETHADIONE Trimethadione
Prestw-22	DEXPANTHENOL Panthenol (D)
Prestw-1094	SULFADOXINE Sulfadoxine
Prestw-1046	REPAGLINIDE Repaglinide
Prestw-372	DEBRISOQUIN SULFATE Debrisoquin sulfate
Prestw-894	BUTYL PARABEN Butylparaben
Prestw-746	CPD000469282 GLYCOPYRROLATE Glycopyrrolate
Prestw-932	ETICLOPRIDE HYDROCHLORIDE S(-)Eticlopride hydrochloride
Prestw-202	TIRATRICOL Tiratricol, 3,3',5-triiodothyroacetic acid
Prestw-826	OXOLAMINE CITRATE Oxalamine citrate salt
Prestw-426	BUFLOMEDIL HYDROCHLORIDE Buflomedil HCl Buflomedil hydrochloride
Prestw-764	FURALTADONE Furaltadone hydrochloride
Prestw-1288	IDEBENONE Idebenone Idebenone, Catena and Sovrima
Prestw-439	CARBIMAZOLE Carbimazole
Prestw-361	BAMBUTEROL HYDROCHLORIDE Bambuterol hydrochloride
Prestw-644	CITIOLONE N-Acetyl-DL-homocysteine Thiolactone
Prestw-1340	1-(2-Methyl-5-nitro-imidazol-1-yl)-propan-2-ol SECNIDAZOLE Secnidazole
Prestw-11	METICRANE Meticrane
Prestw-1498	CAMYLOFINE DIHYDROCHLORIDE Camylofine chlorhydrate
Prestw-807	CHLOROPYRAMINE HYDROCHLORIDE Chloropyramine hydrochloride
Prestw-703	FAMPROFAZONE Famprofazone
Prestw-84	MOROXYDINE HYDROCHLORIDE Moroxidine hydrochloride
Prestw-1166	REBAMIPIDE Rebamipide
Prestw-1321	PROTIONAMIDE Prothionamide
Prestw-88	AMINOPYRINE Amidopyrine
Prestw-1008	CPD000058918 Gabexate mesilate Gabexate mesylate
Prestw-979	CPD000469164 Ozagrel hydrochloride
Prestw-405	Pepstatin A
Prestw-1228	ARGATROBAN Argatroban
Prestw-1349	Tazobactam
Prestw-804	Spectinomycin Spectinomycin dihydrochloride spectinomycin
Prestw-45	NAPROXEN SODIUM Naproxen naproxen
Prestw-627	Folic acid
Prestw-285	Chenodeoxycholic acid Chenodiol Urosiol
Prestw-356	Adenosine 5'-monophosphate monohydrate Adenosine monophosphate
Prestw-418	Biotin
Prestw-957	Deoxycorticosterone
Prestw-411	Androsterone Epiandrosterone
Prestw-440	Androsterone Epiandrosterone
Prestw-1096	Estriol
Prestw-1424	Fulvestrant
Prestw-1456	Opipramol dihydrochloride
Prestw-519	Imipenem Imipenem monohydrate
Prestw-1027	TOCAINIDE Tocainide hydrochloride
Prestw-1376	Cilnidipine n/a
Prestw-1035	Molindone hydrochloride
Prestw-1427	LEVETIRACETAM Levetiracetam Levetiracetam, Keppra
Prestw-1188	Ziprasidone Ziprasidone Hydrochloride Ziprasidone hydrochloride monohydrate n/a
Prestw-1239	BICALUTAMIDE Bicalutamide Bicalutamide (CDX)
Prestw-1233	Auranofin
Prestw-1285	Ibandronate sodium
Prestw-1182	Tizanidine HCl Tizanidine hydrochloride
Prestw-1217	Amisulpride
Prestw-1232	Atorvastatin n/a
Prestw-1405	17a-Ethynylestradiol ETHYNYLESTRADIOL Ethinylestradiol n/a
Prestw-1268	Guaiacol
Prestw-877	Benzeneacetic acid, Alpha-(hydroxymethyl)-, 9-methyl-3-oxa-9-azatricyclo[3.3.1.02,4]non-7-yl ester Scopolamine hydrochloride
Prestw-552	CPD000449328 Selegiline hydrochloride
Prestw-920	(±)-Vesamicol hydrochloride L(-)-vesamicol hydrochloride
Prestw-626	Glycine, N-[2-[(acetylthio)methyl]-1-oxo-3-phenylpropyl]-,phenylmethyl ester [CAS] Racecadotril
Prestw-1069	5-Amino-2-hydroxy-benzoic acid Mesalamine
Prestw-1338	RUFLOXACIN HCl Rufloxacin n/a
Prestw-1139	ITRACONAZOLE Itraconazole
Prestw-956	MEGESTROL ACETATE Megestrol acetate
Prestw-358	Cephalexin monohydrate
Prestw-934	5-FLUOROCYTOSINE Flucytosine
Prestw-982	CPD000058610 Nandrolone
Prestw-1464	TOSUFLOXACIN TOSYLATE Tosufloxacin hydrochloride
Prestw-1416	FLUBENDAZOLE Flubendazol
Prestw-1025	LETROZOLE Letrozole
Prestw-1183	TEMOZOLOMIDE Temozolomide
Prestw-1463	ATOMOXETINE HCl Tomoxetine hydrochloride
Prestw-1058	CPD000469179 Ondansetron Ondansetron Hydrochloride
Prestw-773	LEVONORGESTREL Norgestrel-(-)-D
Prestw-1180	DOCETAXEL Docetaxel n/a
Prestw-1106	MEROPENEM Meropenem n/a
Prestw-1337	ROSIGLITAZONE HCl ROSIGLITAZONE MALEATE Rosiglitazone Rosiglitazone Hydrochloride Rosiglitazone, Avandia n/a
Prestw-438	DOXORUBICIN HYDROCHLORIDE Doxorubicin Doxorubicin hydrochloride EPIRUBICIN HYDROCHLORIDE n/a
Prestw-1137	ESMOLOL HYDROCHLORIDE Esmolol hydrochloride
Prestw-997	FLUTICASONE PROPIONATE Fluticasone propionate
Prestw-1298	LAMIVUDINE Lamivudine
Prestw-1030	TORASEMIDE Torsemide
Prestw-1112	CPD000469151 Procarbazine hydrochloride n/a
Prestw-717	FINASTERIDE Finasteride
Prestw-1257	CALCIPOTRIOL Calcipotriene
Prestw-1152	Nefazodone Nefazodone HCl Nefazodone hydrochloride
Prestw-1446	MOXIFLOXACIN HCl Moxifloxacin n/a
Prestw-153	2',3'-DIDEOXYINOSINE Didanosine
Prestw-1173	IRSOGLADINE MALEATE Irsogladine maleate
Prestw-1319	PRAVASTATIN Sodium Pravastatin n/a
Prestw-1169	MIGLITOL Miglitol
Prestw-1500	VORICONAZOLE Voriconazole n/a
Prestw-1271	CPD000326936 Citalopram HBr salt Citalopram Hydrobromide ESCITALOPRAM OXALATE Escitalopram oxalate
Prestw-1410	EXEMESTANE Exemestane
Prestw-1364	ZAFIRLUKAST Zafirlukast n/a
Prestw-1114	SAQUINAVIR MESYLATE Saquinavir mesylate n/a
Prestw-1488	PENCICLOVIR Penciclovir
Prestw-428	ROXATIDINE ACETATE HCl Roxatidine Acetate HCl Roxatidine Acetate hydrochloride
Prestw-846	Ethynylestradiol 3-methyl ether MESTRANOL
Prestw-1295	ITOPRIDE HCl Itopride Itopride hydrochloride
Prestw-1189	MONTELUKAST Na Montelukast n/a
Prestw-1429	LINEZOLID Linezolid n/a
Prestw-248	1H-Imidazol-2-amine, N-(2,6-dichlorophenyl)-4,5-dihydro- [CAS] Clonidine hydrochloride
Prestw-1421	FORMOTEROL FUMARATE DIHYDRATE Formoterol fumarate arformoterol n/a
Prestw-1400	EFAVIRENZ Efavirenz
Prestw-106	CPD000466365 Nicorandil
Prestw-32	Epirizole MEPIRIZOLE
Prestw-730	BALSALAZIDE Balsalazide Sodium
Prestw-1307	OLOPATADINE HCl Olopatadine hydrochloride n/a
Prestw-1181	TIBOLONE Tibolone
Prestw-1187	GRANISETRON HCl Granisetron n/a
Prestw-1484	2-CHLORO-2'-DEOXYADENOSINE Cladribine n/a
Prestw-1222	ANASTROZOLE Anastrozole n/a
Prestw-1465	Tramadol Tramadol hydrochloride
Prestw-1510	DOLASETRON MESYLATE Dolasetron mesilate
Prestw-1430	LOFEXIDINE HCl Lofexidine
Prestw-1359	VECURONIUM BROMIDE Vecuronium bromide n/a
Prestw-123	DEHYDROCHOLIC ACID Dehydrocholic acid
Prestw-1161	Stanozolol
Prestw-1018	Alprostadil Prostaglandin E1
Prestw-396	CPD000112002 Etoposide
Prestw-5	ATRACURIUM BESYLATE Atracurium Atracurium Atracurium besylate Cisatracurium besylate
Prestw-688	1,3,5(10)-ESTRATRIEN-3-OL-17-ONE SULPHATE, SODIUM SALT Estropipate
Prestw-1144	MIRTAZAPINE Mirtazapine
Prestw-651	GLIMEPIRIDE Glimepiride
Prestw-1369	Zaleplon
Prestw-1290	IMATINIB MESYLATE Imatinib Imatinib (Gleevec) Imatinib (mesylate) Imatinib Mesylate Imatinib mesylate n/a
Prestw-1494	IRINOTECAN HCl )trihydrate) Irinotecan Hydrochloride Irinotecan hydrochloride Irinotecan hydrochloride trihydrate
Prestw-1213	Allopurinol
Prestw-1242	Erlotinib Erlotinib HCl Erlotinib hydrochloride
Prestw-1270	Gefitinib Gefitinib (Iressa)
Prestw-155	Paclitaxel Taxol
Prestw-1291	Imiquimod n/a
Prestw-1362	SAHA Vorinostat Vorinostat (SAHA, MK0683) Vorinostat or SAHA
Prestw-870	Luteolin Luteolin, Flacitran
Prestw-530	Trolox
Prestw-631	Thiamine Thiamine hydrochloride
Prestw-105	Danazol
Prestw-660	Avermectin B1a
Prestw-1473	Estradiol Valerate n/a
Prestw-1501	Fenipentol
Prestw-837	Carbenoxolone disodium salt
Prestw-747	Cefamandole sodium salt
Prestw-49	Amyleine hydrochloride
Prestw-781	Clobetasol propionate
Prestw-101	R(-) Apomorphine hydrochloride hemihydrate n/a
Prestw-813	Bucladesine sodium salt
Prestw-819	Moxalactam disodium salt
Prestw-737	Atractyloside potassium salt
Prestw-821	Azlocillin sodium salt
Prestw-31	Chloramphenicol
Prestw-650	Butirosin disulfate salt
Prestw-1259	Canrenone
Prestw-654	Benfotiamine
Prestw-1032	Articaine hydrochloride
Prestw-1003	Azapropazone
Prestw-93	Azacyclonol
Prestw-656	Lanatoside C
Prestw-743	Medrysone
Prestw-750	Mevalonic-D, L acid lactone
Prestw-748	Monensin sodium salt
Prestw-787	Merbromin
Prestw-843	Nafcillin sodium salt monohydrate
Prestw-745	Spiramycin
Prestw-696	Ethotoin
Prestw-1317	Pranlukast
Prestw-744	Flunixin meglumine
Prestw-652	Picrotoxinin
Prestw-130	Dexamethasone acetate n/a
Prestw-872	Iopromide
Prestw-847	(-) -Levobunolol hydrochloride n/a
Prestw-436	Digitoxigenin n/a
Prestw-437	Digoxin
Prestw-159	Dihydrostreptomycin sulfate n/a
Prestw-758	Ribostamycin sulfate salt n/a
Prestw-1374	Chlormadinone acetate n/a
Prestw-921	NIZATIDINE Nizatidine n/a
Prestw-28	Ethambutol dihydrochloride
Prestw-864	Methylhydantoin-5-(D) n/a
Prestw-860	Methylhydantoin-5-(L) n/a
Prestw-1047	Piretanide n/a
Prestw-850	Equilin
Prestw-643	Flunisolide
Prestw-718	Fluorometholone
Prestw-734	Flumethasone
Prestw-1407	Etofenamate
Prestw-160	Gentamicine sulfate
Prestw-1068	Thiethylperazine dimalate Thiethylperazine maleate
Prestw-925	Thonzonium bromide
Prestw-1022	Tiletamine hydrochloride
Prestw-958	Urosiol
Prestw-400	Hesperidin Hesperidine
Prestw-62	Homatropine hydrobromide (R,S) HomatropineÂ·HBr
Prestw-30	Antipyrine, 4-hydroxy
Prestw-133	Hydroxyzine Dihydrochloride Hydroxyzine dihydrochloride
Prestw-233	Atropine sulfate Hyoscyamine Hyoscyamine (L) atropine
Prestw-971	Remoxipride Hydrochloride Remoxipride hydrochloride
Prestw-1091	Spaglumic acid
Prestw-1192	Oxandrolone
Prestw-302	Lincomycin Lincomycin hydrochloride
Prestw-1162	Zonisamide Zonisamide, Exceglan
Prestw-1127	Acipimox
Prestw-1174	ACARBOSE Acarbose
Prestw-1165	Acitretin
Prestw-1157	RIFAPENTINE Rifapentine
Prestw-1121	Carbadox
Prestw-338	N6-methyladenosine
Prestw-116	Naltrexone hydrochloride dihydrate
Prestw-1140	Liranaftate
Prestw-1497	Ambrisentan n/a
Prestw-1490	Nalmefene hydrochloride n/a
Prestw-1477	D,L-Penicillamine L-Penicillamine Penicillamine
Prestw-274	Prednisolone
Prestw-77	Prednisone
Prestw-189	Aminopurine, 6-benzyl
Prestw-212	Pyrantel tartrate
Prestw-14	Sulfacetamide sodic hydrate
Prestw-401	Testosterone propionate
Prestw-128	Spironolactone
Prestw-321	Streptomycin sulfate
Prestw-347	Thioguanosine
Prestw-173	Tranylcypromine hemisulfate Tranylcypromine hydrochloride
Prestw-331	Tremorine dihydrochloride
Prestw-271	Vincamine
Prestw-68	Isoxsuprine hydrochloride
Prestw-158	Neomycin Neomycin sulfate
Prestw-154	Josamycin KITASAMYCIN
Prestw-20	Minoxidil
Prestw-79	Diphemanil methylsulfate
Prestw-18	Idoxuridine
Prestw-127	Isoconazole
Prestw-95	Lynestrenol
Prestw-149	Thioproperazine dimesylate
Prestw-469	Niridazole
Prestw-232	(-)-Scopolamine N-oxide Scopolamin-N-oxide hydrobromide
Prestw-433	Cyanocobalamin
Prestw-398	Oxantel pamoate
Prestw-463	Metrizamide
Prestw-283	Homochlorcyclizine dihydrochloride
Prestw-36	Troleandomycin
Prestw-455	Mebhydroline 1,5-naphtalenedisulfonate
Prestw-169	Hydralazine hydrochloride
Prestw-279	Methylprednisolone, 6-alpha
Prestw-315	Minocycline hydrochloride Minocycline·HCl
Prestw-201	Ranitidine hydrochloride
Prestw-261	Ethisterone
Prestw-253	Norethindrone
Prestw-281	Fludrocortisone acetate
Prestw-309	Amodiaquin dihydrochloride dihydrate
Prestw-319	Clofilium tosylate
Prestw-325	Ascorbic acid
Prestw-381	Lidoflazine
Prestw-362	Betamethasone
Prestw-357	Amoxicillin
Prestw-424	Cephalosporanic acid, 7-amino
Prestw-395	Amikacin hydrate
Prestw-410	Amphotericin B
Prestw-327	Cefoperazone dihydrate
Prestw-354	Clopamide
Prestw-397	Clomiphene citrate (Z,E)
Prestw-349	Ritodrine hydrochloride
Prestw-406	SR-95639A dihydrochloride
Prestw-175	Aceclofenac
Prestw-110	Acenocoumarol
Prestw-416	Bacampicillin hydrochloride
Prestw-484	Benperidol Benperidol, Anquil
Prestw-430	Cisapride
Prestw-486	Colistin sulfate
Prestw-460	Dinoprost trometamol Prostaglandin F2 Prostaglandin F2a
Prestw-488	Dosulepin hydrochloride
Prestw-512	Iohexol
Prestw-491	Metixene hydrochloride
Prestw-513	Norcyclobenzaprine
Prestw-495	Terconazole
Prestw-496	Tiaprofenic acid
Prestw-497	Vancomycin hydrochloride
Prestw-425	Chicago sky blue 6B
Prestw-390	Fusidic acid sodium salt
Prestw-525	Rifampicin
Prestw-517	Nystatine
Prestw-502	Biperiden hydrochloride
Prestw-504	Etifenin
Prestw-506	Sisomicin sulfate
Prestw-528	Triflusal
Prestw-546	Pregnenolone
Prestw-547	Molsidomine
Prestw-549	Trimetazidine dihydrochloride
Prestw-539	Thiocolchicoside
Prestw-550	Parthenolide
Prestw-560	Prenylamine lactate
Prestw-234	Chlorphensin carbamate
Prestw-24	Norethynodrel
Prestw-242	Flavoxate HCl salt Flavoxate hydrochloride
Prestw-252	Diphenidol hydrochloride
Prestw-57	Benoxinate hydrochloride
Prestw-615	Chrysene-1,4-quinone
Prestw-148	Canrenoic acid potassium salt
Prestw-185	Aztreonam
Prestw-421	Suloctidil
Prestw-222	Antimycin A Antimycin A1
Prestw-572	Mometasone furoate
Prestw-565	Atropine sulfate Atropine sulfate monohydrate Hyoscyamine Hyoscyamine (L) atropine
Prestw-866	Azacytidine-5
Prestw-845	Amiprilose hydrochloride
Prestw-855	Beclomethasone dipropionate
Prestw-720	Cefuroxime sodium salt
Prestw-797	Methotrimeprazine maleat salt
Prestw-792	Propidium iodide
Prestw-867	Paromomycin sulfate
Prestw-859	Fluvastatin sodium salt
Prestw-857	(+) -Levobunolol hydrochloride n/a
Prestw-791	(R) -Naproxen sodium salt NAPROXEN SODIUM Naproxen naproxen
Prestw-794	Eucatropine hydrochloride
Prestw-697	3-alpha-Hydroxy-5-beta-androstan-17-one Androsterone
Prestw-645	Flurandrenolide
Prestw-774	Fluocinonide
Prestw-655	Halcinonide
Prestw-809	Dichlorphenamide
Prestw-771	Alclometasone dipropionate
Prestw-12	Benzonatate
Prestw-43	Betazole hydrochloride
Prestw-365	Brinzolamide
Prestw-408	Butoconazole nitrate
Prestw-446	Carteolol hydrochloride
Prestw-1118	Cefepime hydrochloride n/a
Prestw-462	CEFIXIME TRIHYDRATE Cefixime
Prestw-470	Ceforanide
Prestw-473	Cefotetan
Prestw-482	Cefotiam hydrochloride
Prestw-489	Ceftazidime pentahydrate
Prestw-1119	Clocortolone pivalate n/a
Prestw-616	Demecarium bromide
Prestw-619	Diflorasone Diacetate
Prestw-630	Dimethisoquin hydrochloride
Prestw-632	Dipivefrin hydrochloride
Prestw-1116	Dorzolamide HCl salt, Trusopt Dorzolamide hydrochloride n/a
Prestw-671	Dydrogesterone
Prestw-767	Guanadrel sulfate
Prestw-788	Hexylcaine hydrochloride
Prestw-838	Iocetamic acid
Prestw-848	Iodixanol
Prestw-871	Iopamidol
Prestw-878	Ioversol
Prestw-795	Isocarboxazid
Prestw-6	Isoflupredone acetate
Prestw-522	Thiostrepton
Prestw-676	Beta-Escin
Prestw-1087	2-Chloropyrazine
Prestw-986	Proscillaridin A
Prestw-1075	(R)-Propranolol hydrochloride
Prestw-1082	(-)-Eseroline fumarate salt
Prestw-913	2-Aminobenzenesulfonamide
Prestw-899	Adrenosterone
Prestw-882	Bemegride Megibal
Prestw-937	Dehydroisoandosterone 3-acetate
Prestw-883	Digoxigenin
Prestw-983	Dimaprit dihydrochloride
Prestw-955	Florfenicol
Prestw-1080	Methiazole
Prestw-1036	Alcuronium chloride
Prestw-1001	Alfadolone acetate
Prestw-1005	Apramycin
Prestw-1028	Benzathine benzylpenicillin
Prestw-942	Bretylium tosylate
Prestw-994	Cyclopenthiazide
Prestw-1074	Cyproterone acetate
Prestw-1013	Deptropine citrate
Prestw-963	Enilconazole
Prestw-1006	Epitiostanol
Prestw-1015	Ethamsylate
Prestw-908	Ethynodiol diacetate
Prestw-1017	Etilefrine hydrochloride
Prestw-1041	1H-Imidazole-5-carboxylic acid, 1-(1-phenylethyl)-, ethyl ester, (R)- [CAS] Etomidate
Prestw-893	Felbinac
Prestw-1011	Flucloxacillin sodium
Prestw-1007	Fursultiamine Fursultiamine Hydrochloride
Prestw-991	Gliquidone
Prestw-901	4-Methylumbelliferone Hymecromone
Prestw-1071	Imidurea
Prestw-939	Iodipamide
Prestw-1062	Ioxaglic acid
Prestw-1023	Isometheptene mucate
Prestw-1021	Isradipine
Prestw-1039	Levocabastine hydrochloride
Prestw-1054	Levopropoxyphene napsylate
Prestw-1000	Lymecycline
Prestw-1064	Meprylcaine hydrochloride
Prestw-1004	Meptazinol hydrochloride
Prestw-1066	Methantheline bromide
Prestw-900	Methylatropine nitrate
Prestw-904	Metyrapone
Prestw-912	Monobenzone
Prestw-1051	Moricizine hydrochloride
Prestw-1063	Naftifine hydrochloride
Prestw-1024	Nifurtimox
Prestw-1033	Nomegestrol acetate
Prestw-1057	Oxprenolol hydrochloride
Prestw-1043	Penbutolol sulfate
Prestw-1061	Phensuximide
Prestw-1048	Piperacetazine
Prestw-1009	Pivampicillin
Prestw-1053	Pivmecillinam hydrochloride
Prestw-943	Pralidoxime chloride
Prestw-1044	Prednicarbate
Prestw-1059	Propoxycaine hydrochloride
Prestw-1040	Pyrvinium pamoate
Prestw-1050	Quinethazone
Prestw-1109	Rifabutin n/a
Prestw-1020	Rimexolone
Prestw-1045	Sertaconazole nitrate
Prestw-1010	Talampicillin hydrochloride
Prestw-1067	Ticarcillin sodium
Prestw-1012	Trapidil
Prestw-1019	Tribenoside
Prestw-1042	Tridihexethyl chloride
Prestw-1056	Trifluridine
Prestw-1105	Verteporfin n/a
Prestw-1113	Viomycin sulfate n/a
Prestw-998	Zuclopenthixol dihydrochloride Zuclopenthixol hydrochloride
Prestw-935	(-)-MK 801 hydrogen maleate Dizocilpine maleate
Prestw-981	Nitrocaramiphen hydrochloride
Prestw-973	Pirlindole mesylate
Prestw-954	Tyloxapol
Prestw-919	Bacitracin
Prestw-461	Tropisetron HCl Tropisetron hydrochloride
Prestw-413	Carbarsone
Prestw-1120	Nadifloxacin n/a
Prestw-451	Alizapride HCl Alizapride hydrochloride
Prestw-1104	Clonixin Lysinate n/a
Prestw-187	Catharanthine
Prestw-369	Meloxicam
Prestw-1476	Amcinonide n/a
Prestw-1211	Alfacalcidol
Prestw-1471	Amfepramone hydrochloride
Prestw-1219	Amlodipine
Prestw-1478	RIFAXIMIN Rifaximin n/a
Prestw-1223	Anethole trithione Anethole-trithione n/a
Prestw-1236	Benztropine mesylate n/a
Prestw-1244	Bosentan n/a
Prestw-1253	Butylscopolammonium (n-) bromide Scopolamine N-butylbromide
Prestw-1254	Fentiazac
Prestw-1258	Candesartan n/a
Prestw-1266	Gemcitabine n/a
Prestw-1267	Gestrinone
Prestw-1274	Emedastine
Prestw-1292	Ipsapirone
Prestw-1297	Lacidipine
Prestw-1318	Pranoprofen
Prestw-1328	Reboxetine mesylate Reboxetine methanesulfonate, Davedax
Prestw-1331	Rimantadine Hydrochloride
Prestw-1334	Rivastigmine n/a
Prestw-1341	Sertindole
Prestw-1343	Sparfloxacin n/a
Prestw-1345	Sulbactam n/a
Prestw-1351	Tenatoprazole
Prestw-1358	Vatalanib Vatalanib dihydrochloride (PTK787)
Prestw-1368	Zotepine
Prestw-1380	Clobutinol hydrochloride
Prestw-1385	Closantel
Prestw-1392	Dexfenfluramine hydrochloride
Prestw-1393	Dibenzepine hydrochloride
Prestw-1394	Diclazuril n/a
Prestw-1403	Entacapone
Prestw-1408	Etoricoxib
Prestw-1409	Etretinate
Prestw-1414	Fleroxacin n/a
Prestw-1415	Floxuridine
Prestw-1420	Formestane
Prestw-1423	Fosinopril n/a
Prestw-1435	Melengestrol acetate n/a
Prestw-1443	Misoprostol
Prestw-1452	Norgestimate
Prestw-1467	Troglitazone
Prestw-1132	Celiprolol HCl Celiprolol hydrochloride
Prestw-1136	Doxofylline
Prestw-1154	Nilvadipine
Prestw-1483	Fludarabine n/a
Prestw-1486	Cortisol acetate
Prestw-1503	Diosmin
Prestw-1507	Acefylline
Prestw-1506	Mizolastine
Prestw-1509	Deflazacort
Prestw-1231	Asenapine maleate
Prestw-1379	Clinafloxacin
Prestw-1387	Tetraethylenepentamine pentahydrochloride
Prestw-1431	Loracarbef
Prestw-1512	Abacavir Sulfate
Prestw-1508	Ibutilide fumarate
Prestw-1515	Fadrozole hydrochloride

## Sheet: Table S7
Table S6: Candidate Compound
Compound	Concentration (uM)
Fenbendazole	0.5
Mebendazole	0.5
Cytarabine	0.3
Trifluridine	3
Irinotecan	0.5
Etoposide	0.3
Digitoxigenin	0.3
Digoxin	0.3
